# Supplementary material
Source: PubMed Central journal article supplement (PMC3212731)

# Multi-Component Asymmetric Aziridination of Aldehydes

Anil K. Gupta, Munmun Mukherjee, and William D. Wulff\*

Department of Chemistry, Michigan State University, East Lansing, MI 48824

## Supporting Information\_2

### Table of Contents

|                                                              |    |
|--------------------------------------------------------------|----|
| 1. <sup>1</sup> H NMR spectrum of compound <b>19a</b> .....  | 4  |
| 2. <sup>13</sup> C NMR spectrum of compound <b>19a</b> ..... | 5  |
| 3. <sup>1</sup> H NMR spectrum of compound <b>19b</b> .....  | 6  |
| 4. <sup>13</sup> C NMR spectrum of compound <b>19b</b> ..... | 7  |
| 5. <sup>1</sup> H NMR spectrum of compound <b>19c</b> .....  | 8  |
| 6. <sup>13</sup> C NMR spectrum of compound <b>19c</b> ..... | 9  |
| 7. <sup>1</sup> H NMR spectrum of compound <b>19d</b> .....  | 10 |
| 8. <sup>13</sup> C NMR spectrum of compound <b>19d</b> ..... | 11 |
| 9. <sup>1</sup> H NMR spectrum of compound <b>19e</b> .....  | 12 |

|                                                               |    |
|---------------------------------------------------------------|----|
| 10. $^{13}\text{C}$ NMR spectrum of compound <b>19e</b> ..... | 13 |
| 11. $^1\text{H}$ NMR spectrum of compound <b>19f</b> .....    | 14 |
| 12. $^{13}\text{C}$ NMR spectrum of compound <b>19f</b> ..... | 15 |
| 13. $^1\text{H}$ NMR spectrum of compound <b>19g</b> .....    | 16 |
| 14. $^{13}\text{C}$ NMR spectrum of compound <b>19g</b> ..... | 17 |
| 15. $^1\text{H}$ NMR spectrum of compound <b>19h</b> .....    | 18 |
| 16. $^{13}\text{C}$ NMR spectrum of compound <b>19h</b> ..... | 19 |
| 17. $^1\text{H}$ NMR spectrum of compound <b>19i</b> .....    | 20 |
| 18. $^{13}\text{C}$ NMR spectrum of compound <b>19i</b> ..... | 21 |
| 19. $^1\text{H}$ NMR spectrum of compound <b>19j</b> .....    | 22 |
| 20. $^{13}\text{C}$ NMR spectrum of compound <b>19j</b> ..... | 23 |
| 21. $^1\text{H}$ NMR spectrum of compound <b>19k</b> .....    | 24 |
| 22. $^{13}\text{C}$ NMR spectrum of compound <b>19k</b> ..... | 25 |
| 23. $^1\text{H}$ NMR spectrum of compound <b>19l</b> .....    | 26 |
| 24. $^{13}\text{C}$ NMR spectrum of compound <b>19l</b> ..... | 27 |
| 25. $^1\text{H}$ NMR spectrum of compound <b>19m</b> .....    | 28 |
| 26. $^{13}\text{C}$ NMR spectrum of compound <b>19m</b> ..... | 29 |
| 27. $^1\text{H}$ NMR spectrum of compound <b>19n</b> .....    | 30 |

|                                                               |    |
|---------------------------------------------------------------|----|
| 28. $^{13}\text{C}$ NMR spectrum of compound <b>19n</b> ..... | 31 |
| 29. $^1\text{H}$ NMR spectrum of compound <b>19o</b> .....    | 32 |
| 30. $^{13}\text{C}$ NMR spectrum of compound <b>19o</b> ..... | 33 |
| 31. $^1\text{H}$ NMR spectrum of compound <b>19p</b> .....    | 34 |
| 32. $^{13}\text{C}$ NMR spectrum of compound <b>19p</b> ..... | 35 |
| 33. $^1\text{H}$ NMR spectrum of compound <b>19q</b> .....    | 36 |
| 34. $^{13}\text{C}$ NMR spectrum of compound <b>19q</b> ..... | 37 |
| 35. $^1\text{H}$ NMR spectrum of compound <b>19r</b> .....    | 38 |
| 36. $^{13}\text{C}$ NMR spectrum of compound <b>19r</b> ..... | 39 |
| 37. $^1\text{H}$ NMR spectrum of compound <b>19s</b> .....    | 40 |
| 38. $^{13}\text{C}$ NMR spectrum of compound <b>19s</b> ..... | 41 |
| 39. $^1\text{H}$ NMR spectrum of compound <b>13r</b> .....    | 42 |
| 40. $^{13}\text{C}$ NMR spectrum of compound <b>13r</b> ..... | 43 |
| 41. $^1\text{H}$ NMR spectrum of compound <b>21</b> .....     | 44 |
| 42. $^{13}\text{C}$ NMR spectrum of compound <b>21</b> .....  | 45 |
| 43. $^1\text{H}$ NMR spectrum of compound <b>22</b> .....     | 46 |
| 44. $^{13}\text{C}$ NMR spectrum of compound <b>22</b> .....  | 47 |

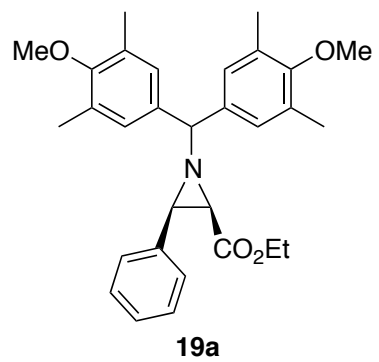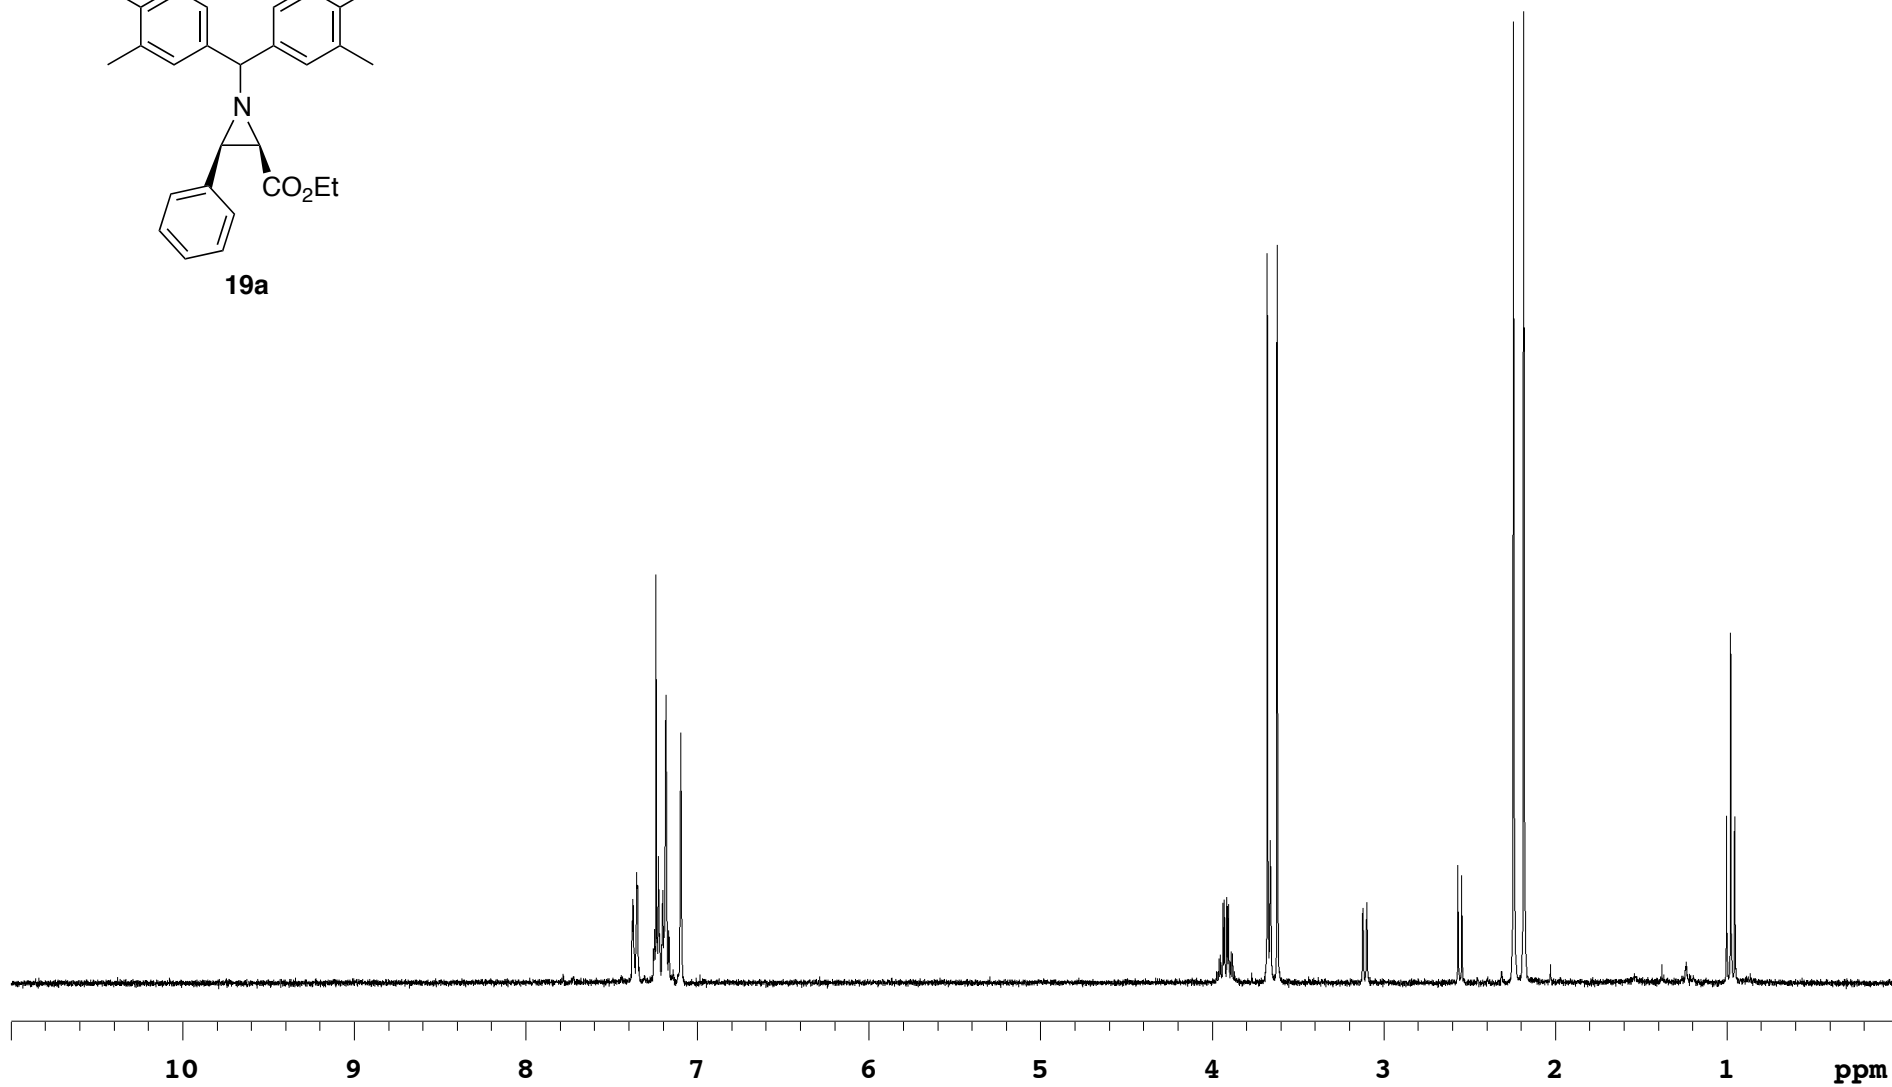

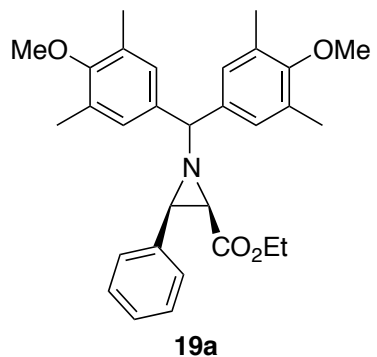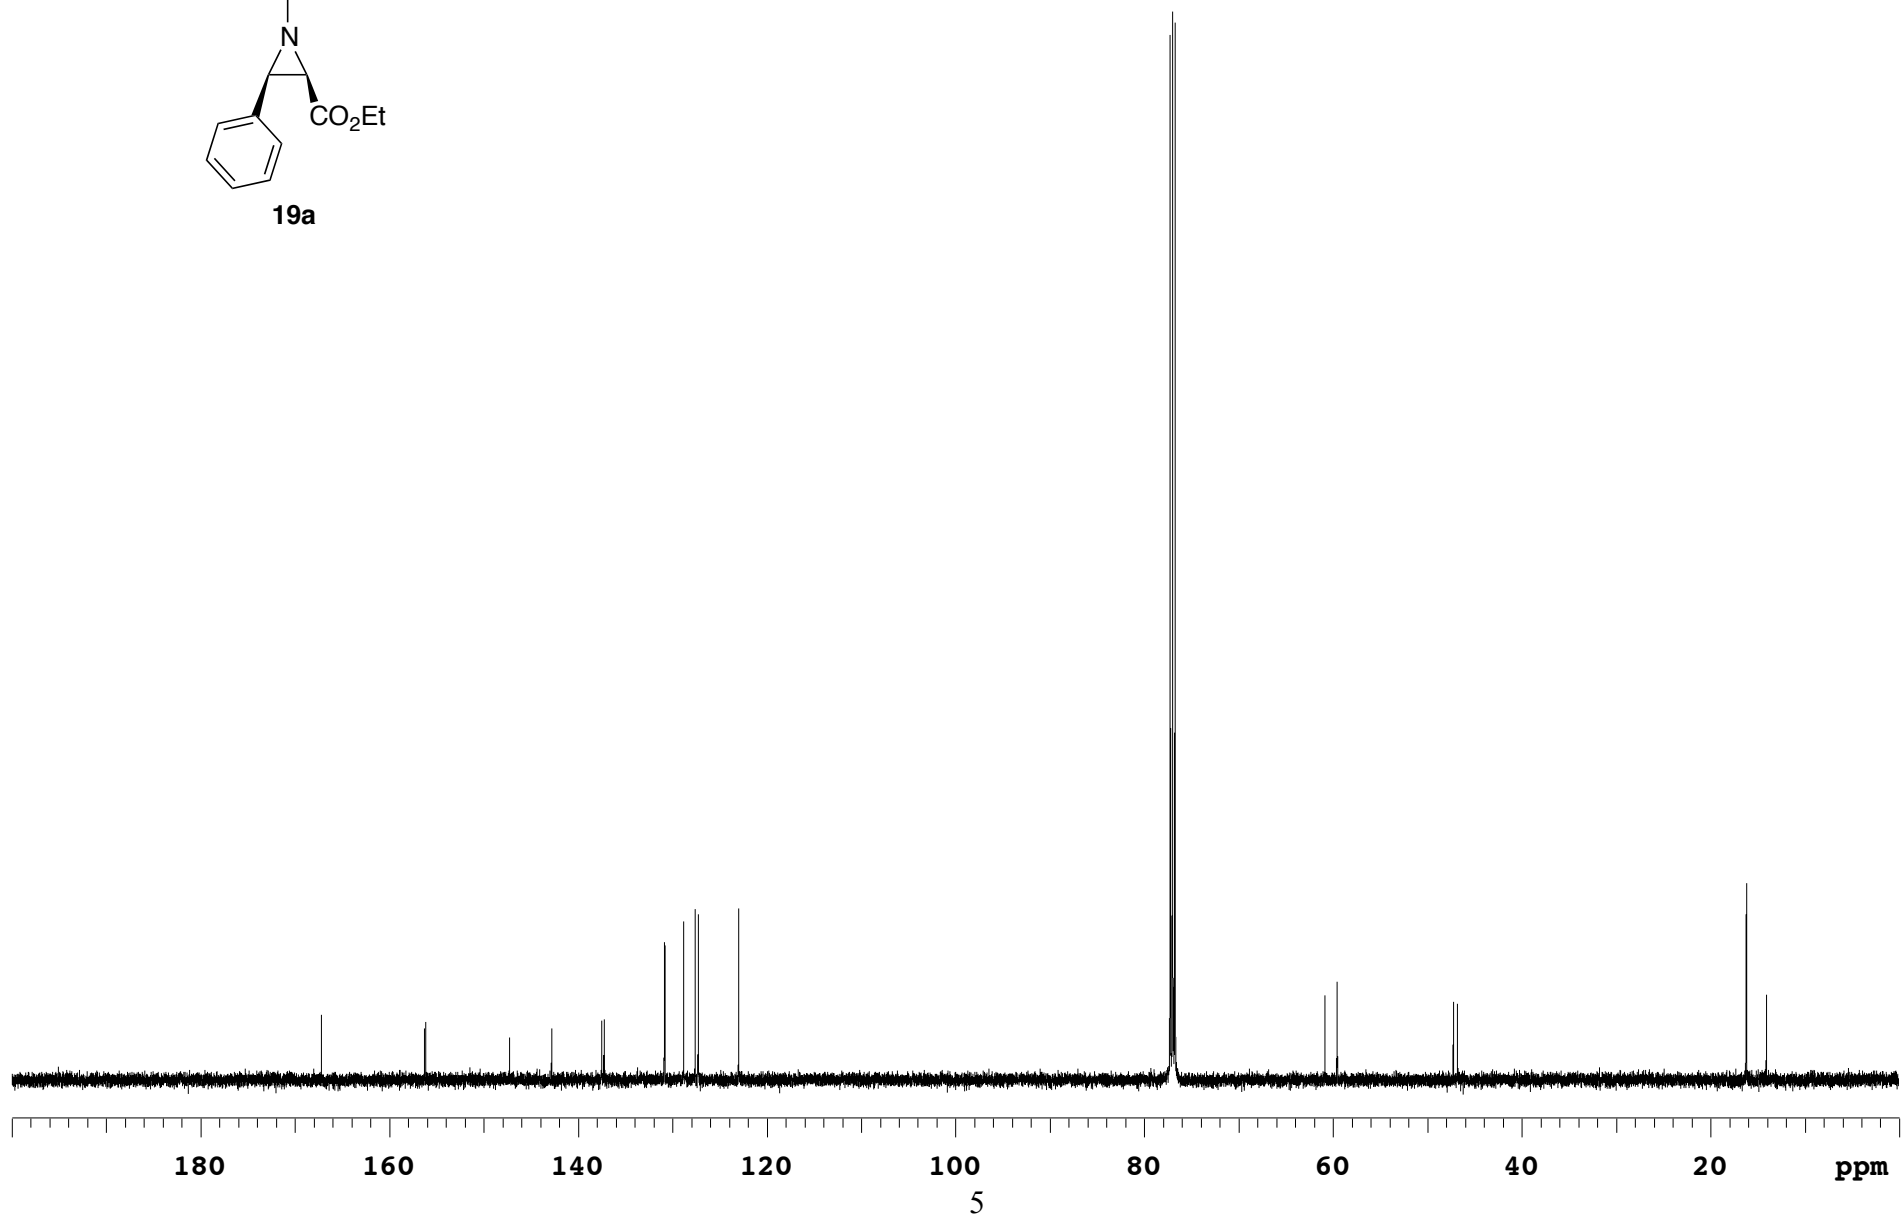

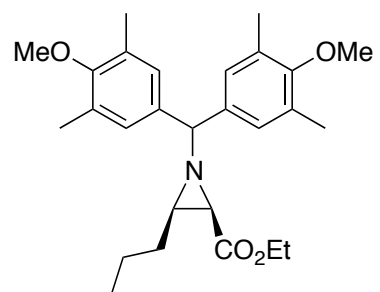

19b

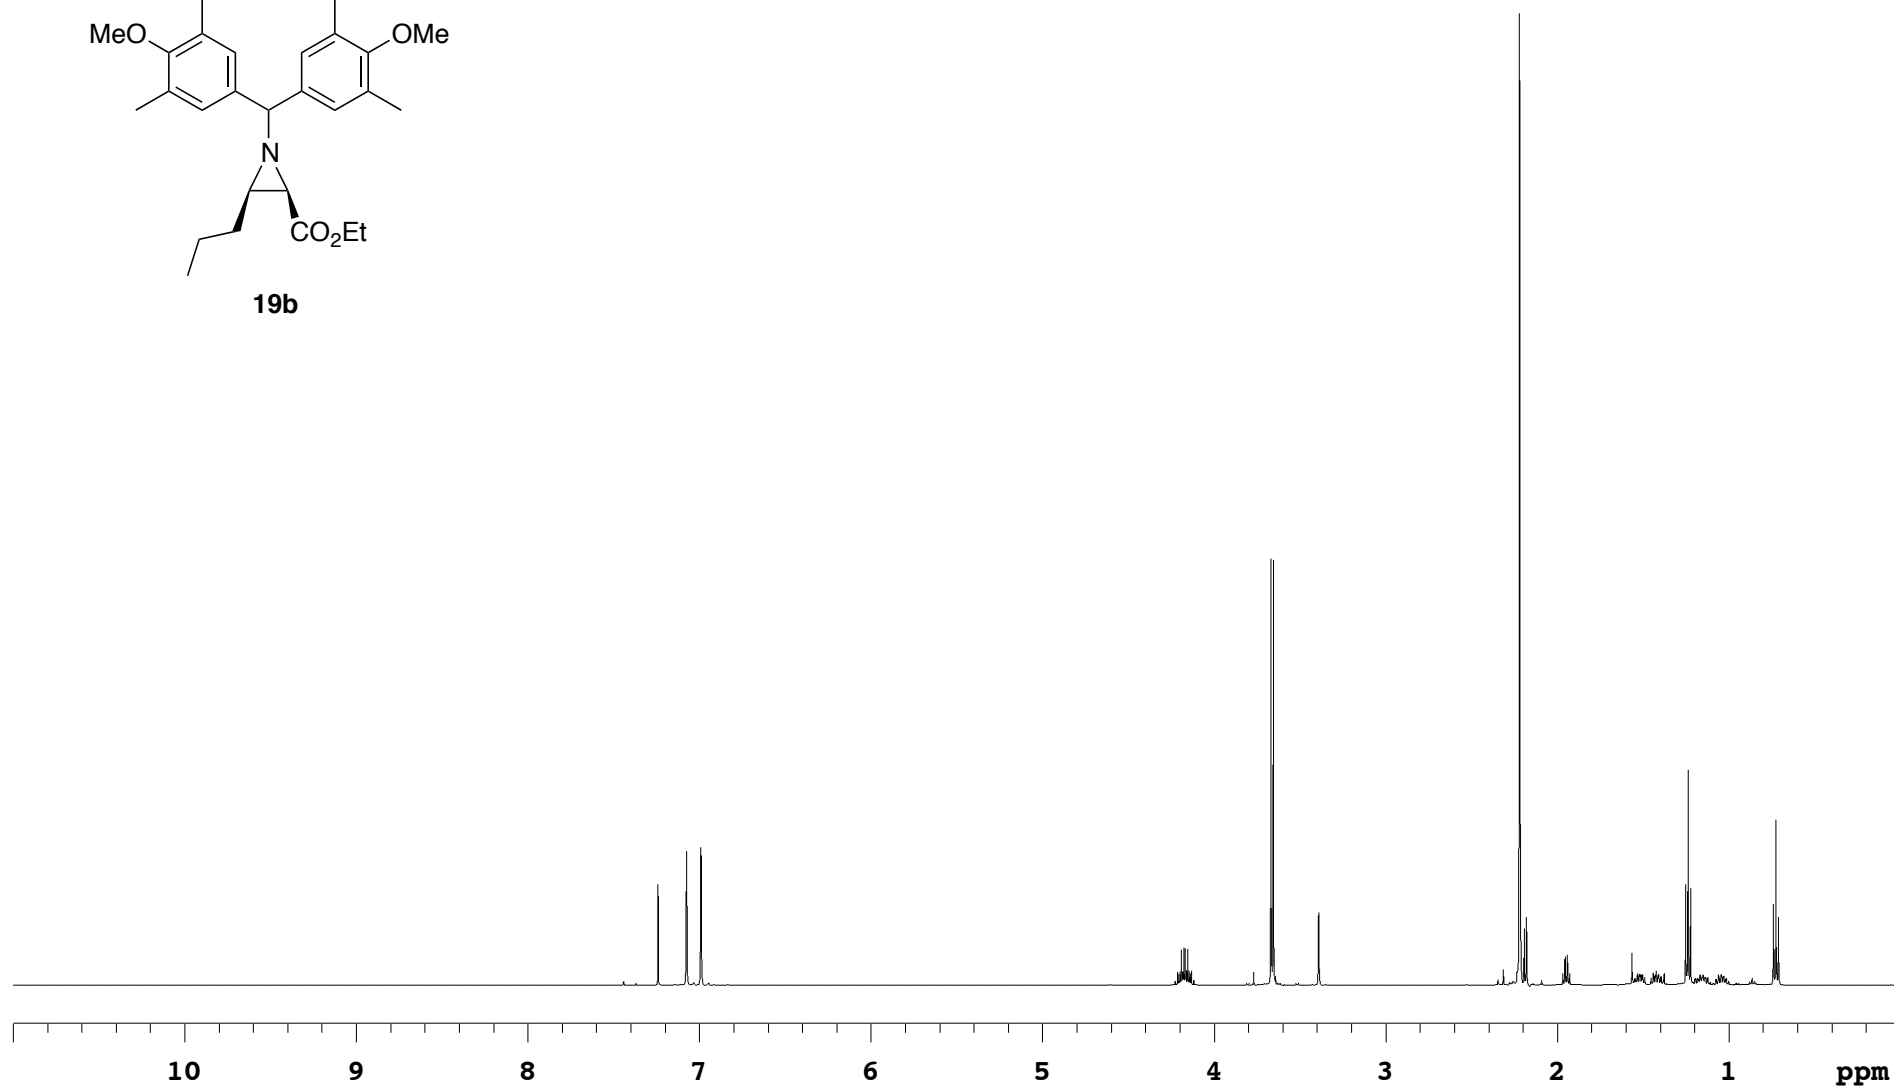

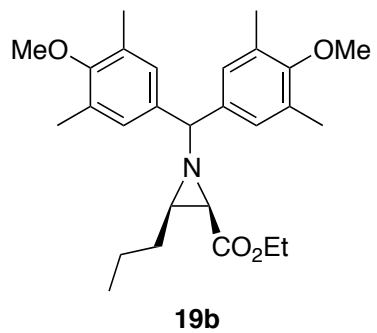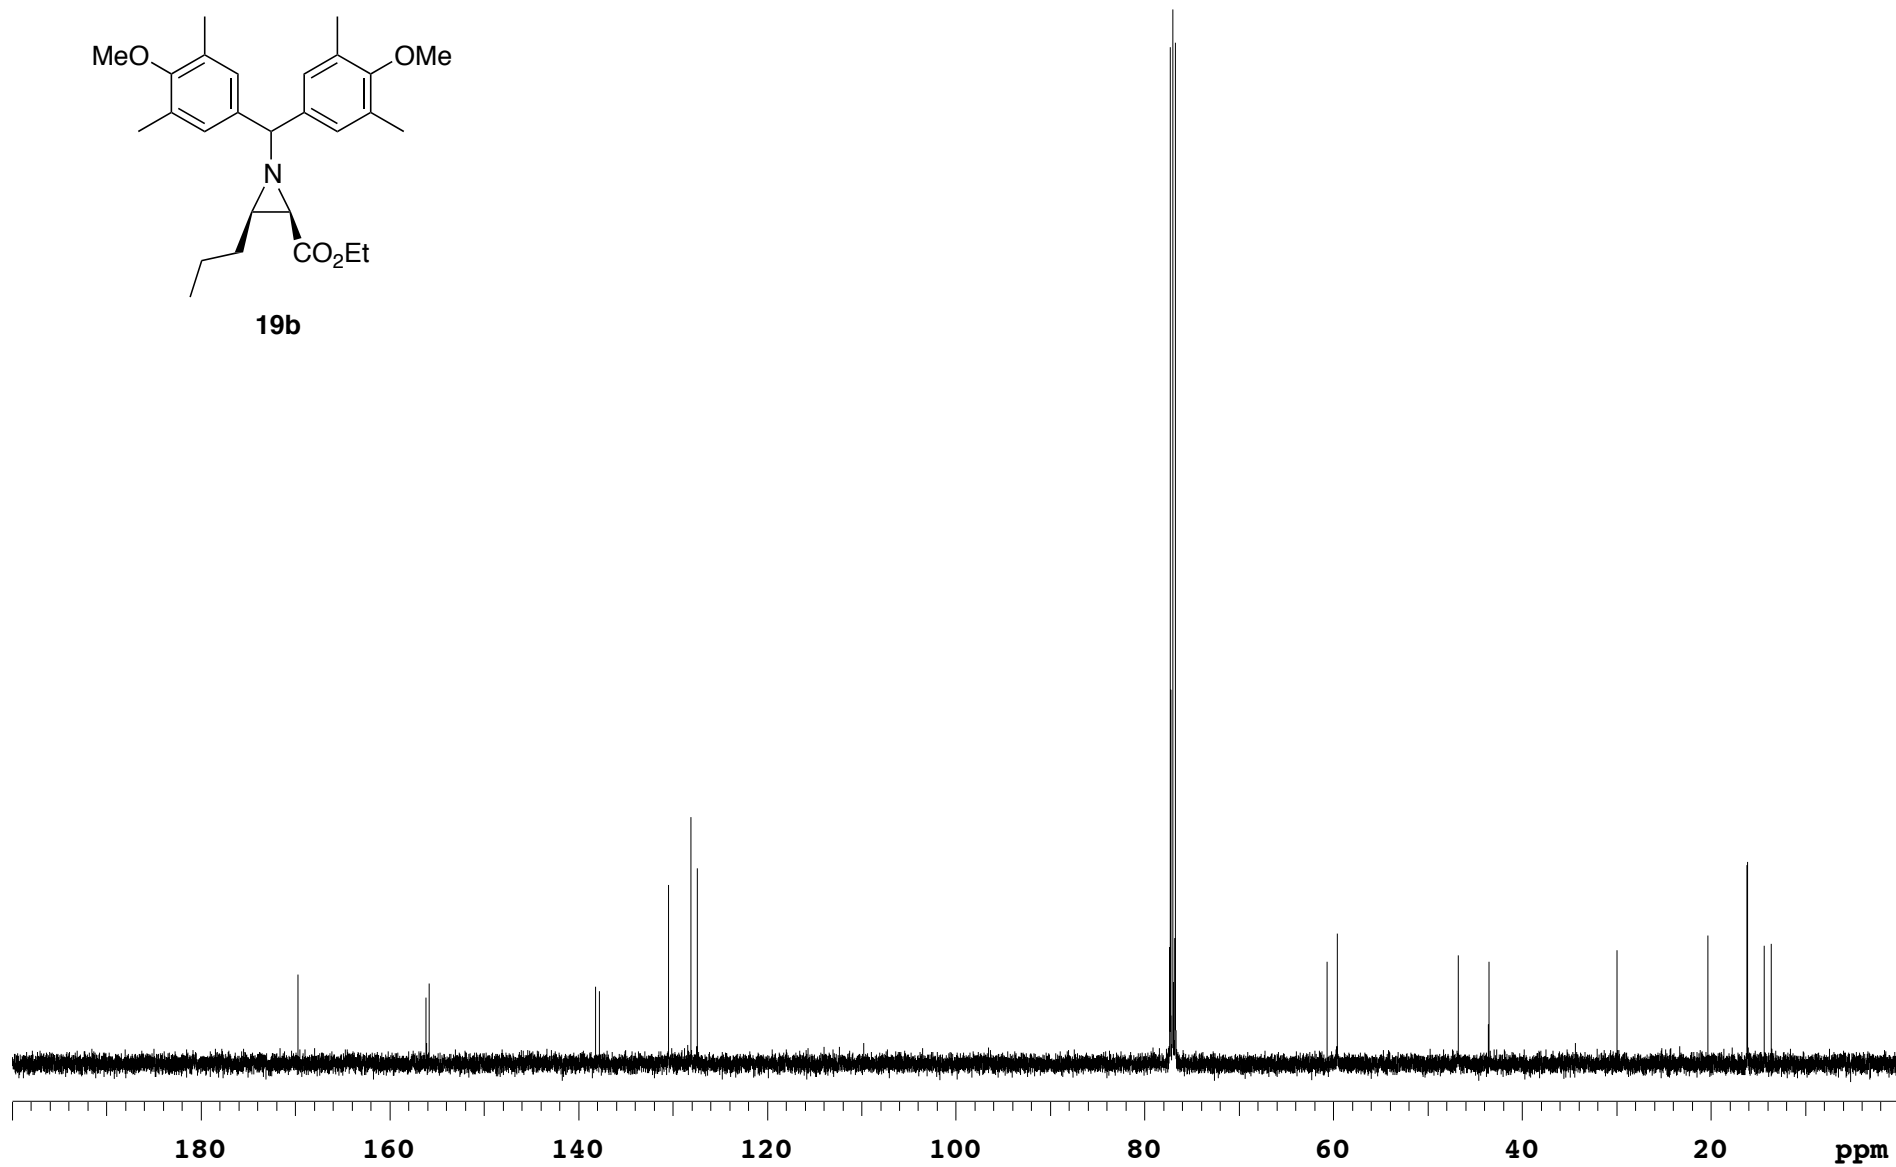

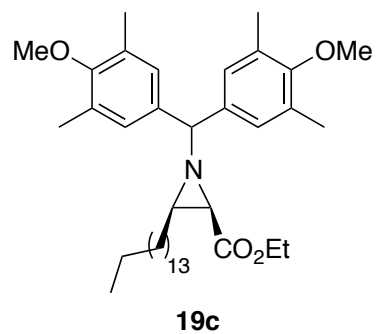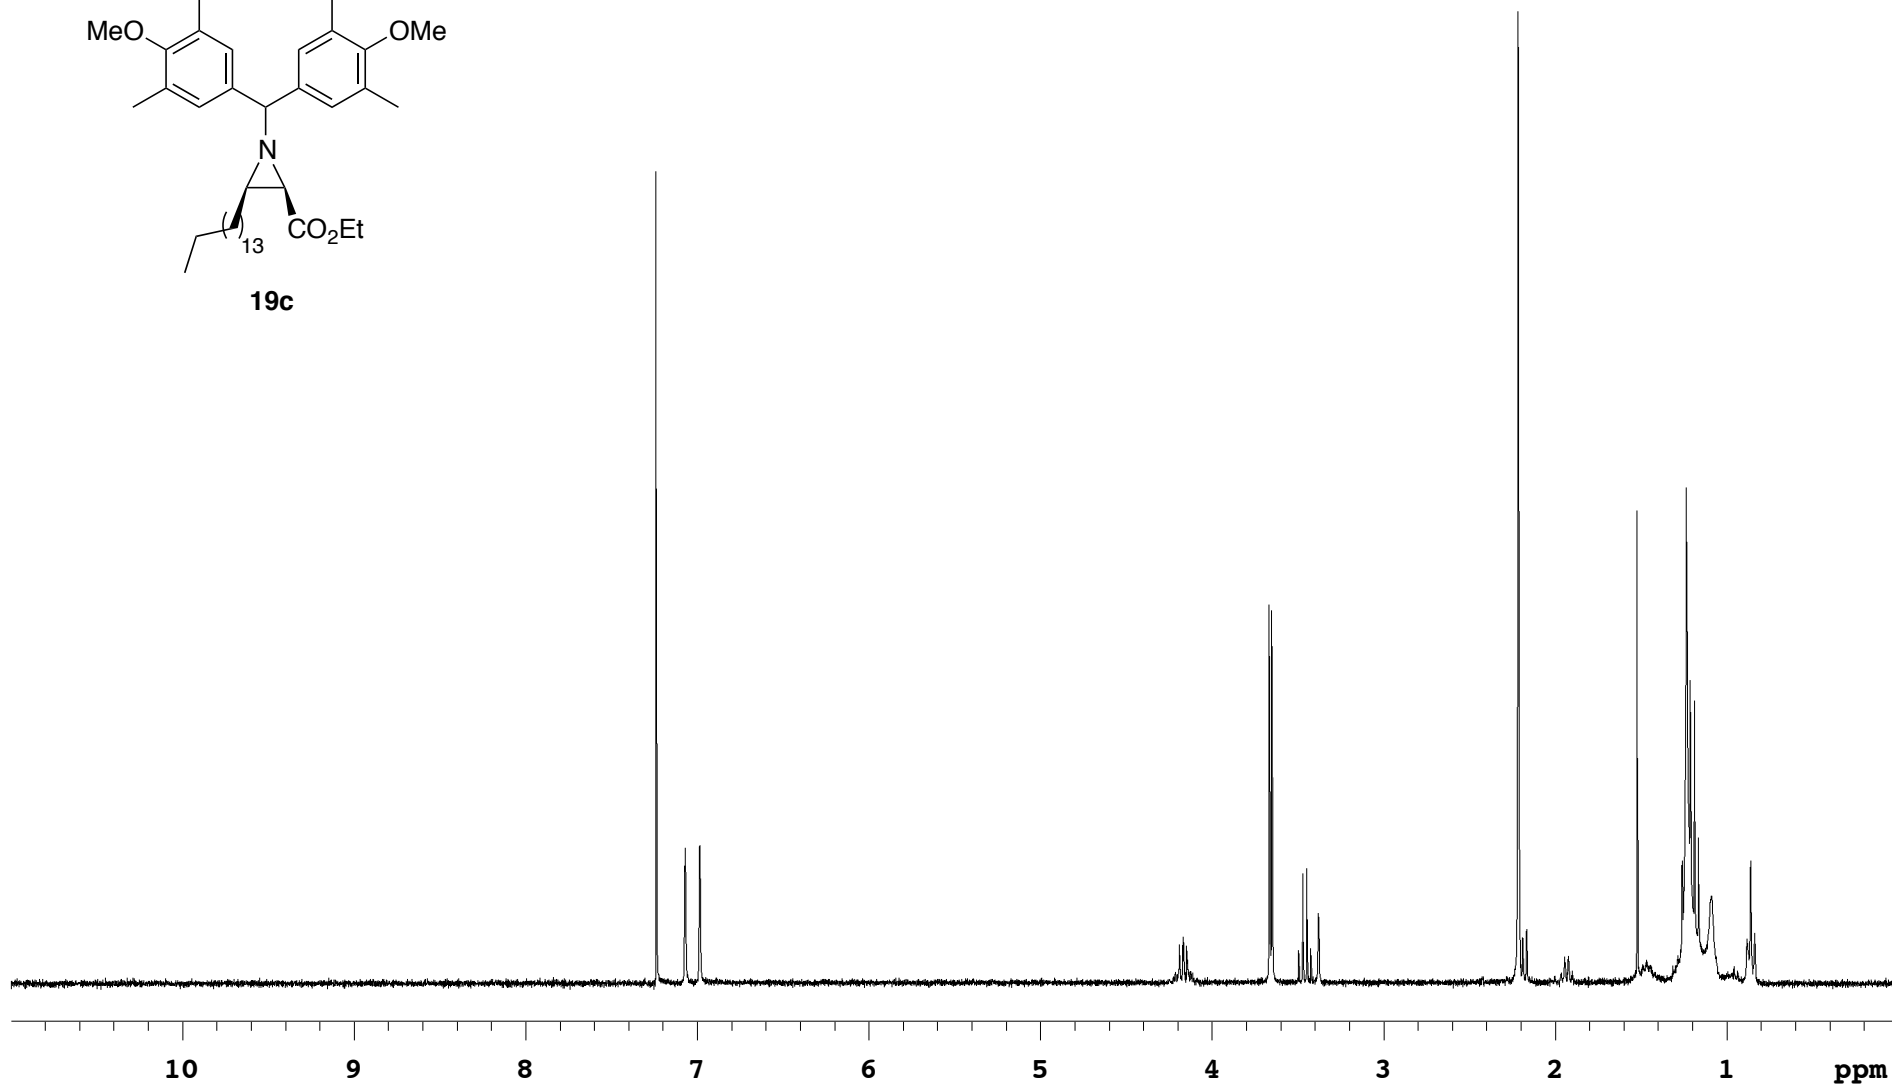



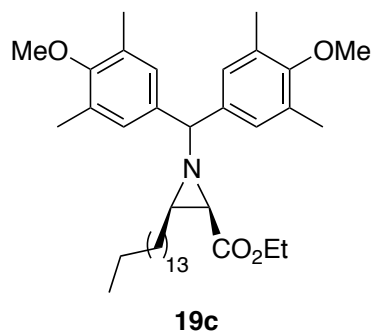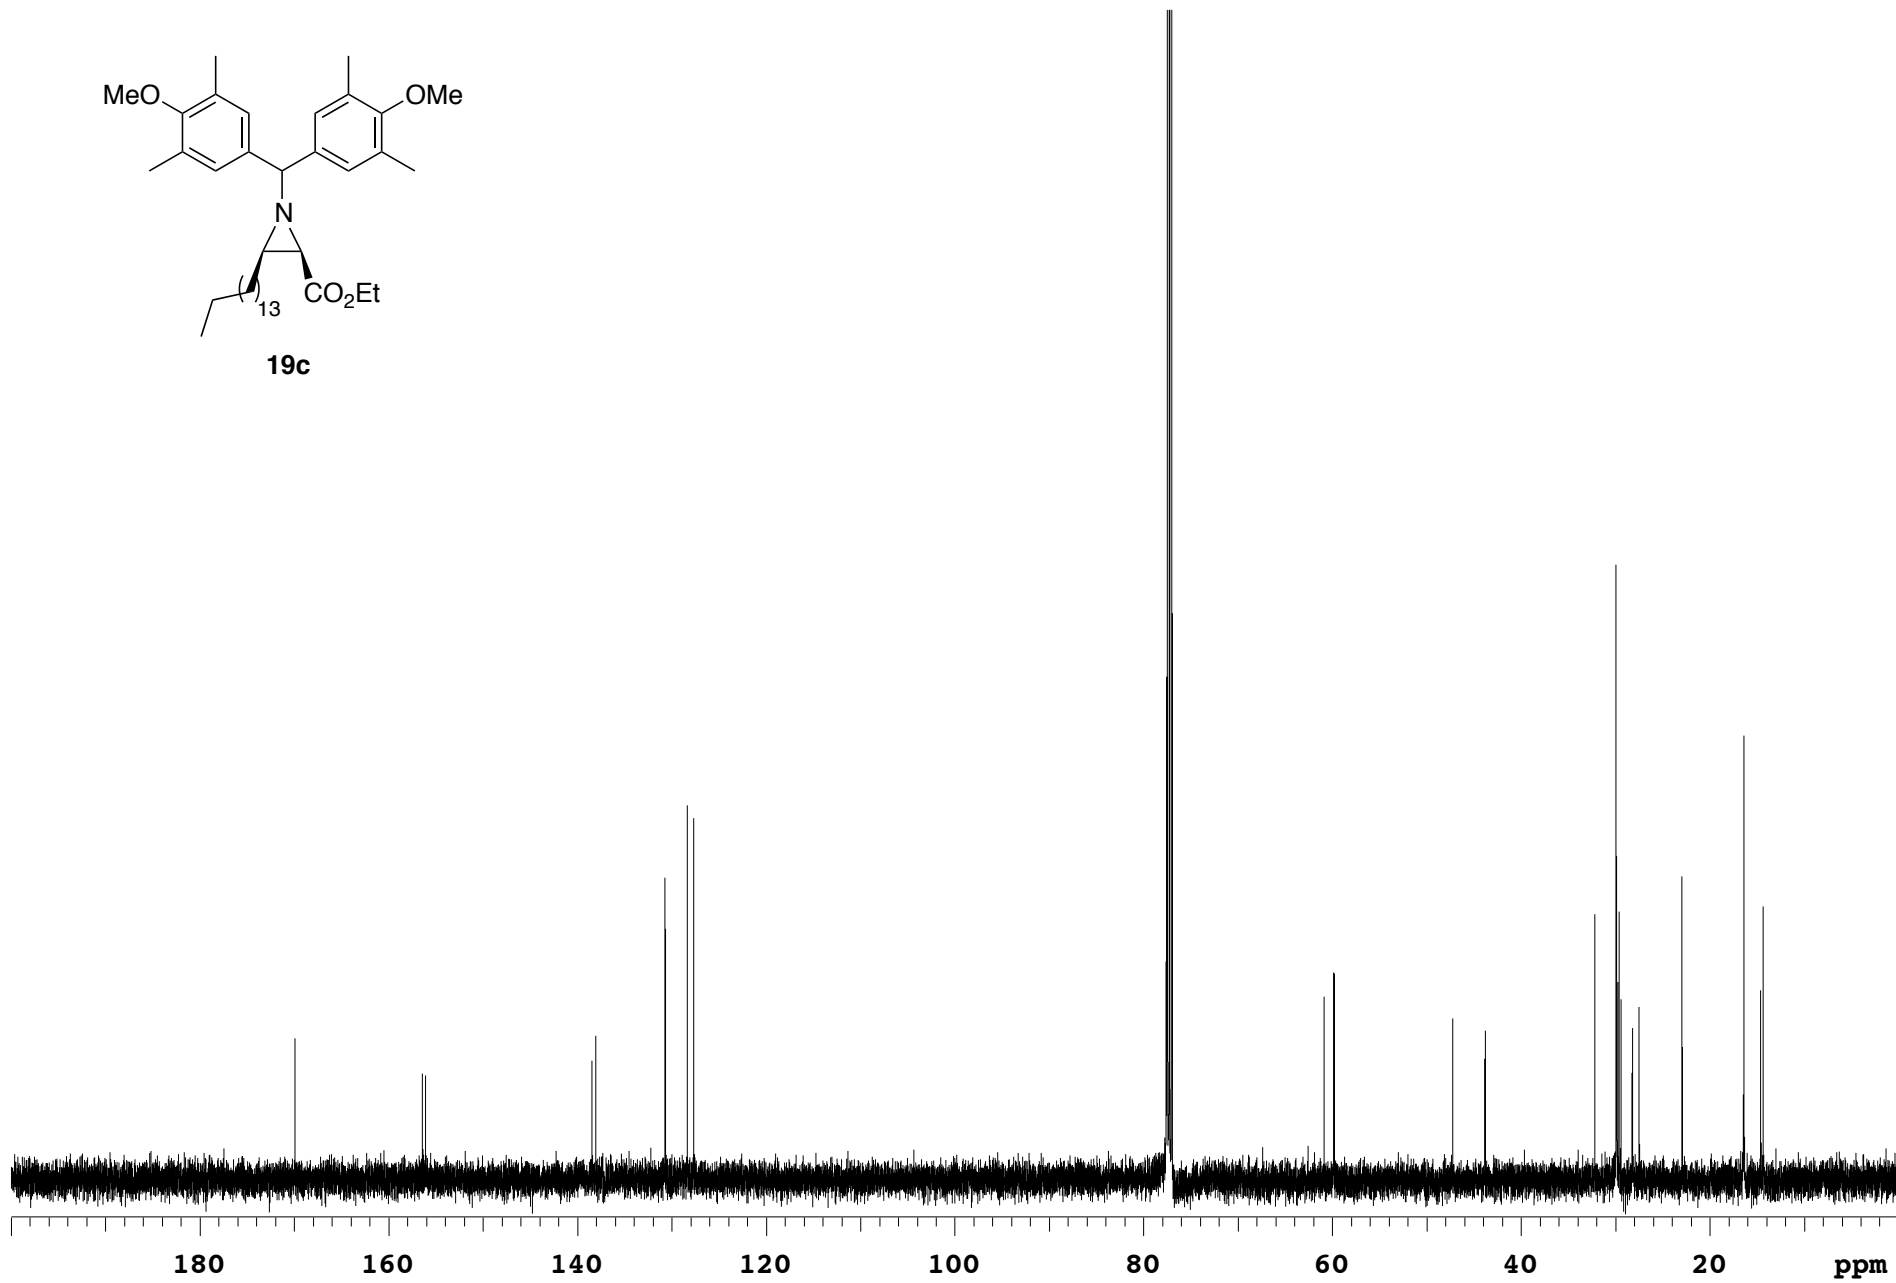

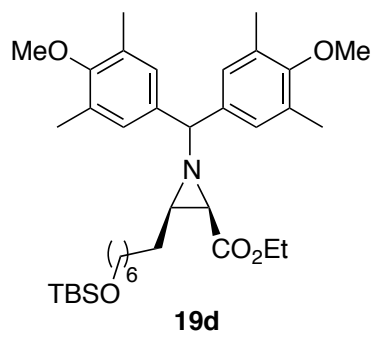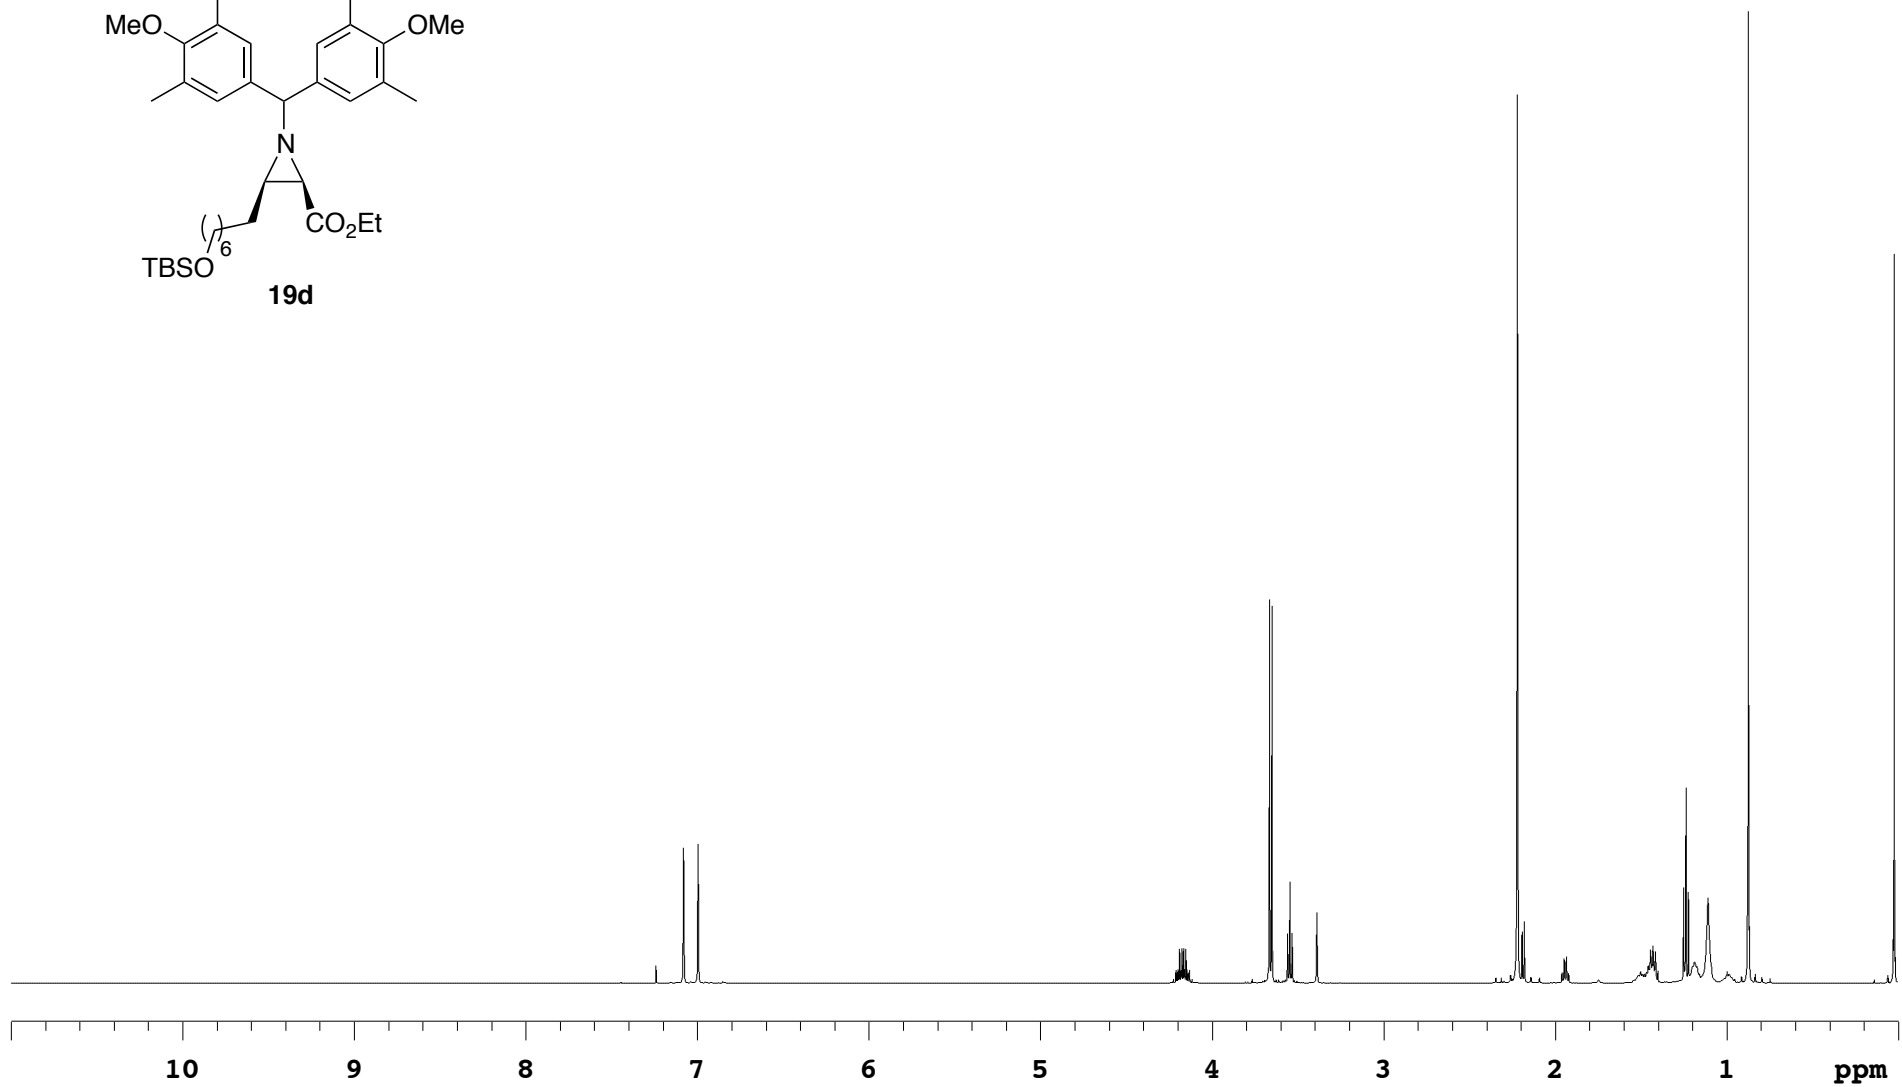

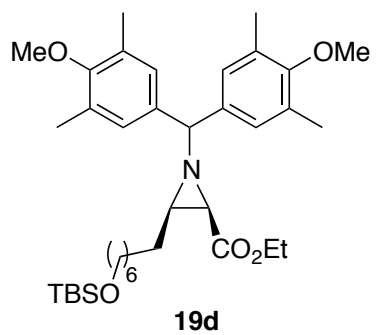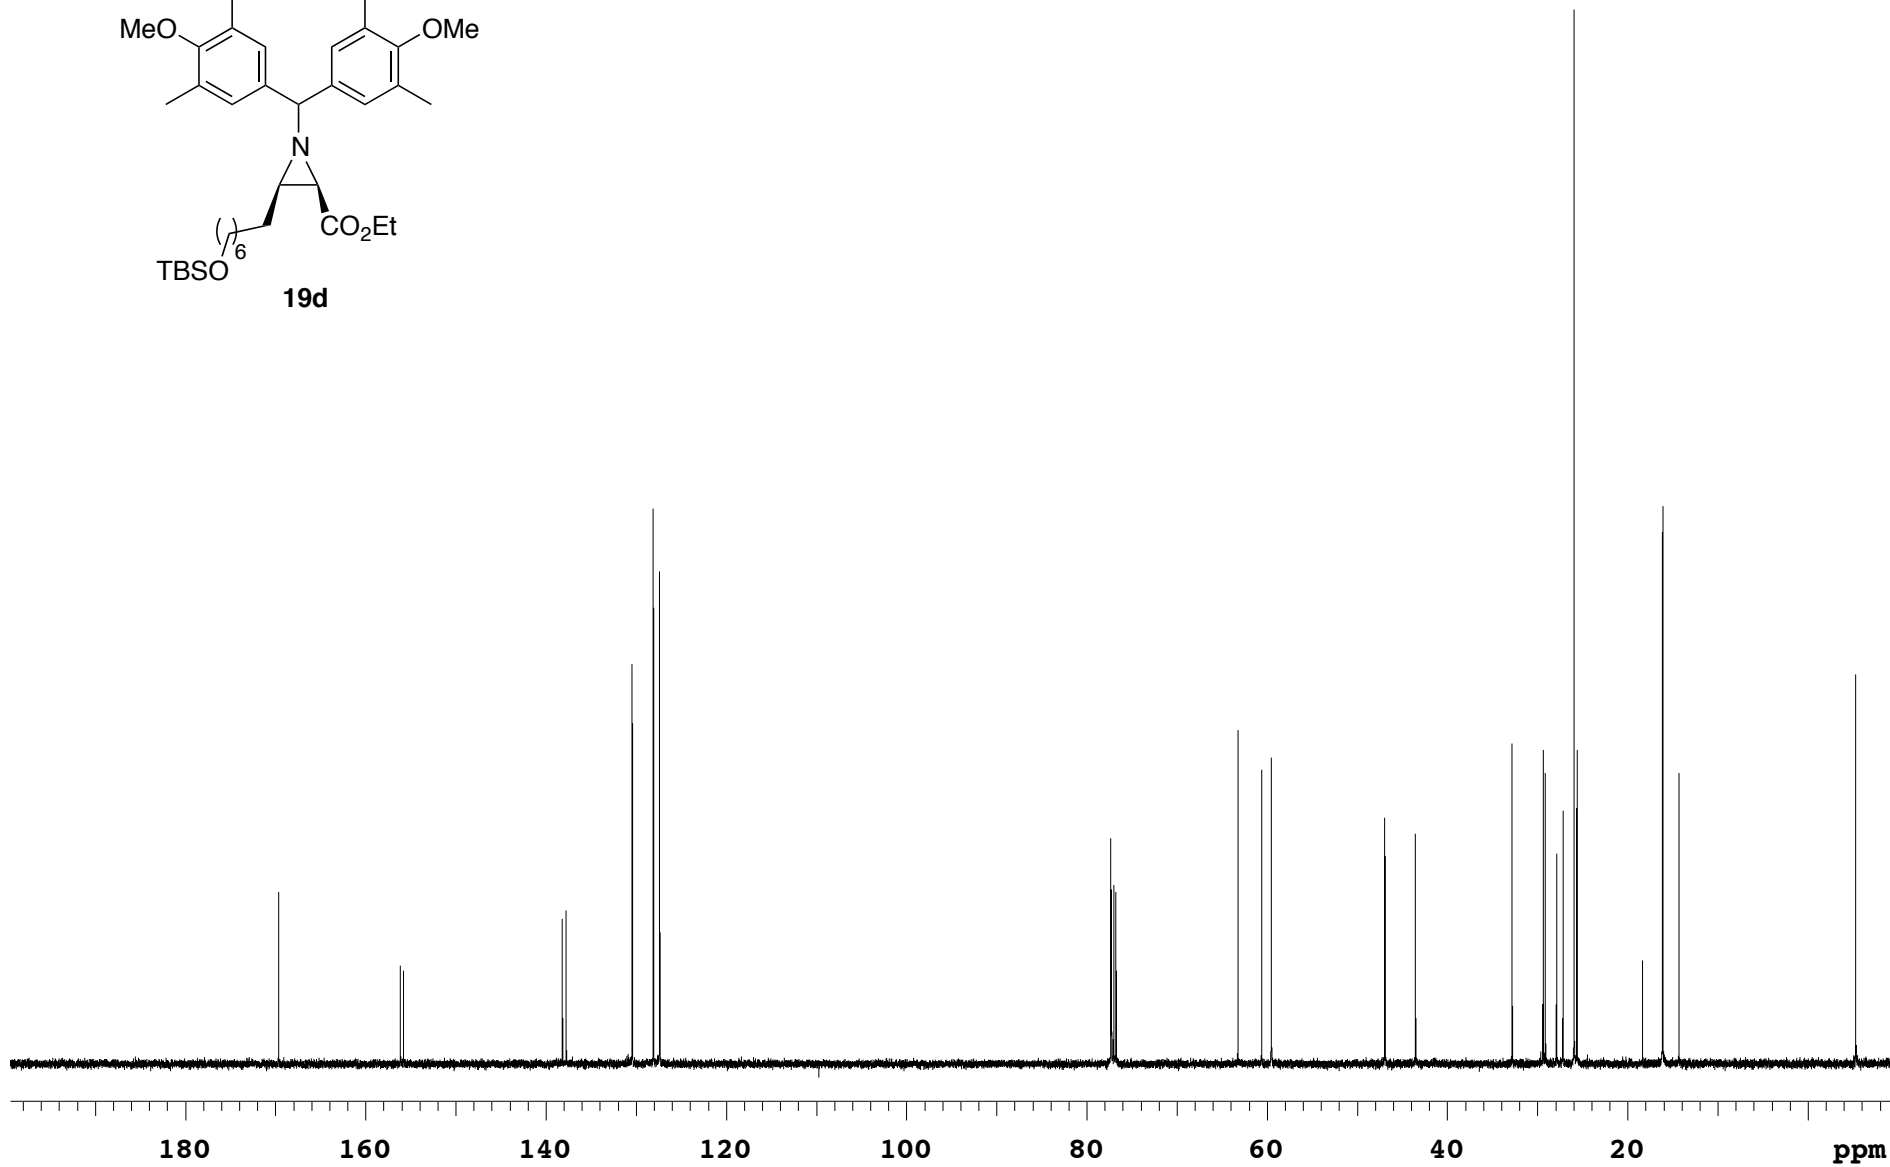

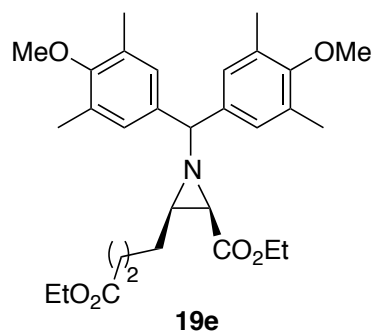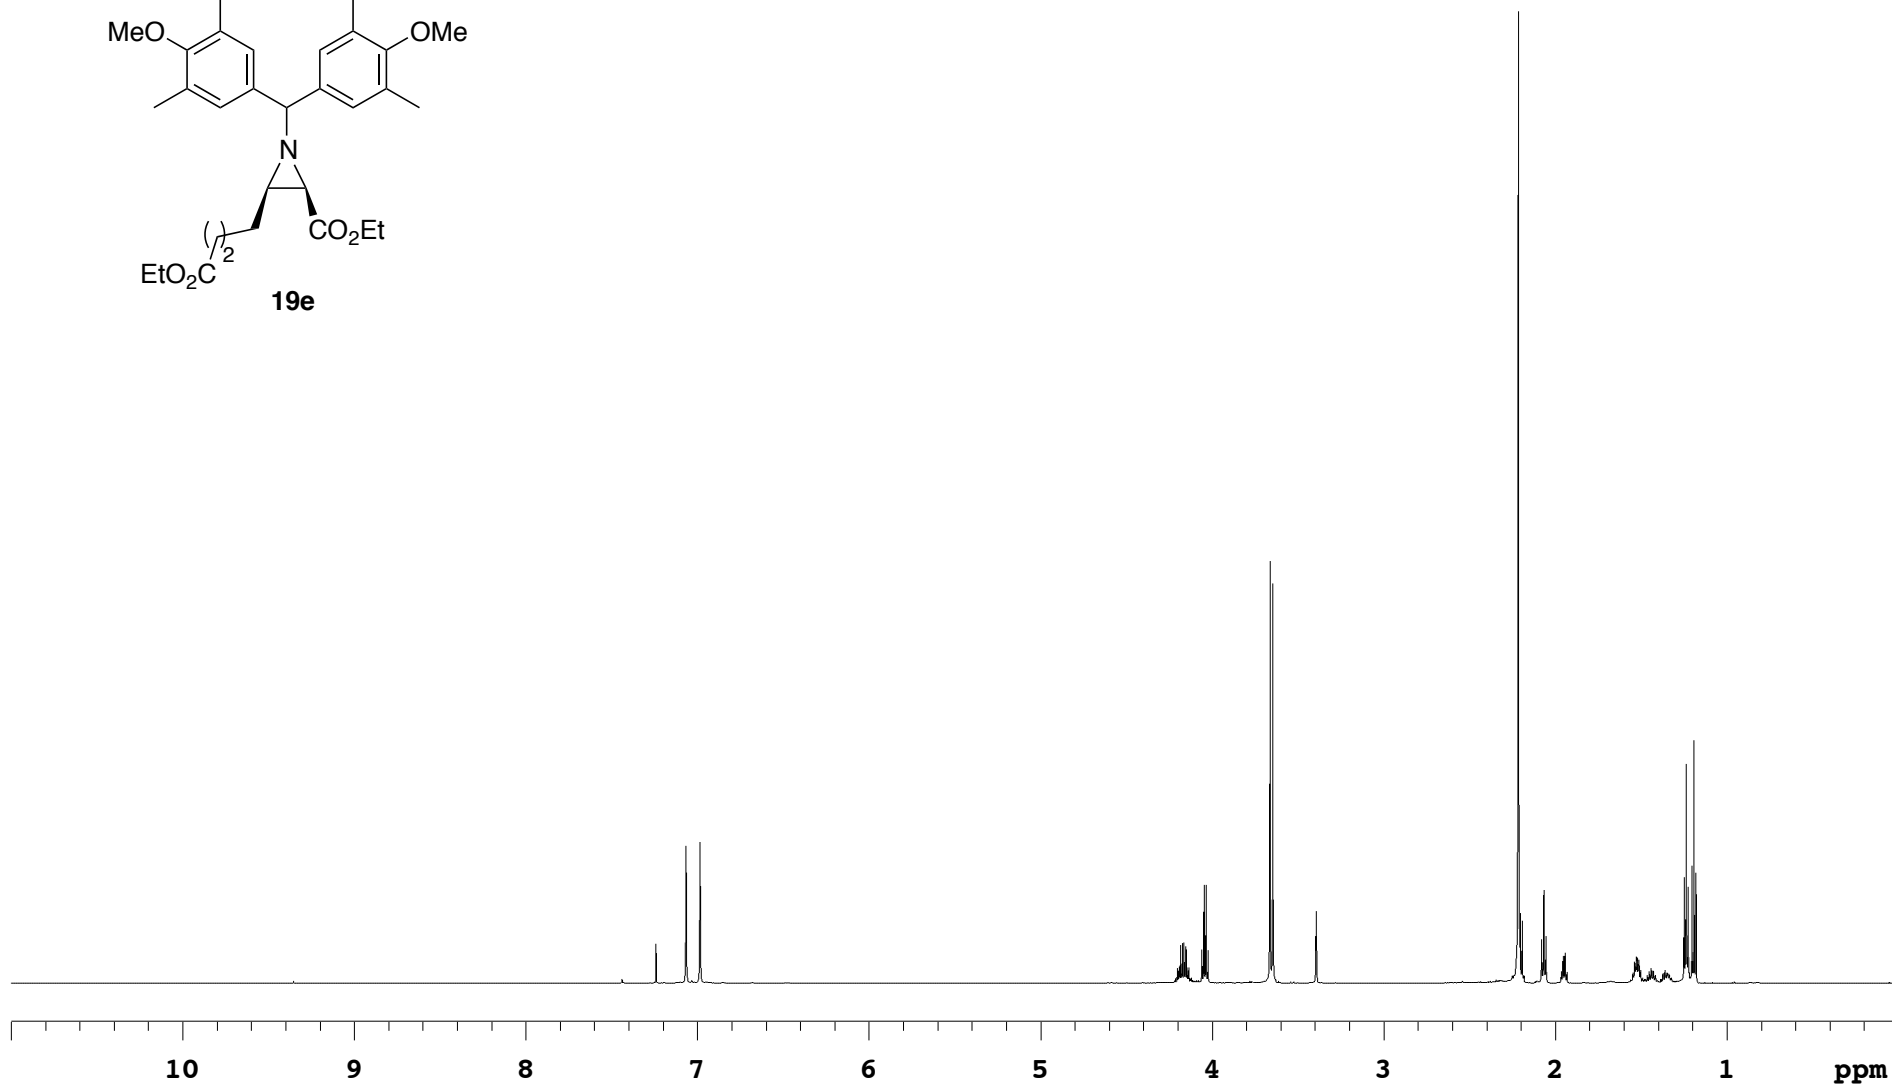

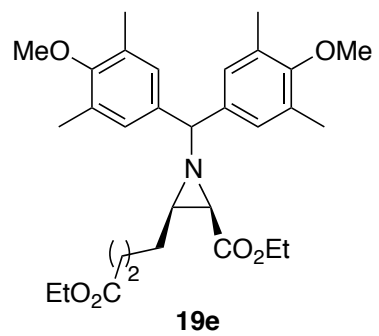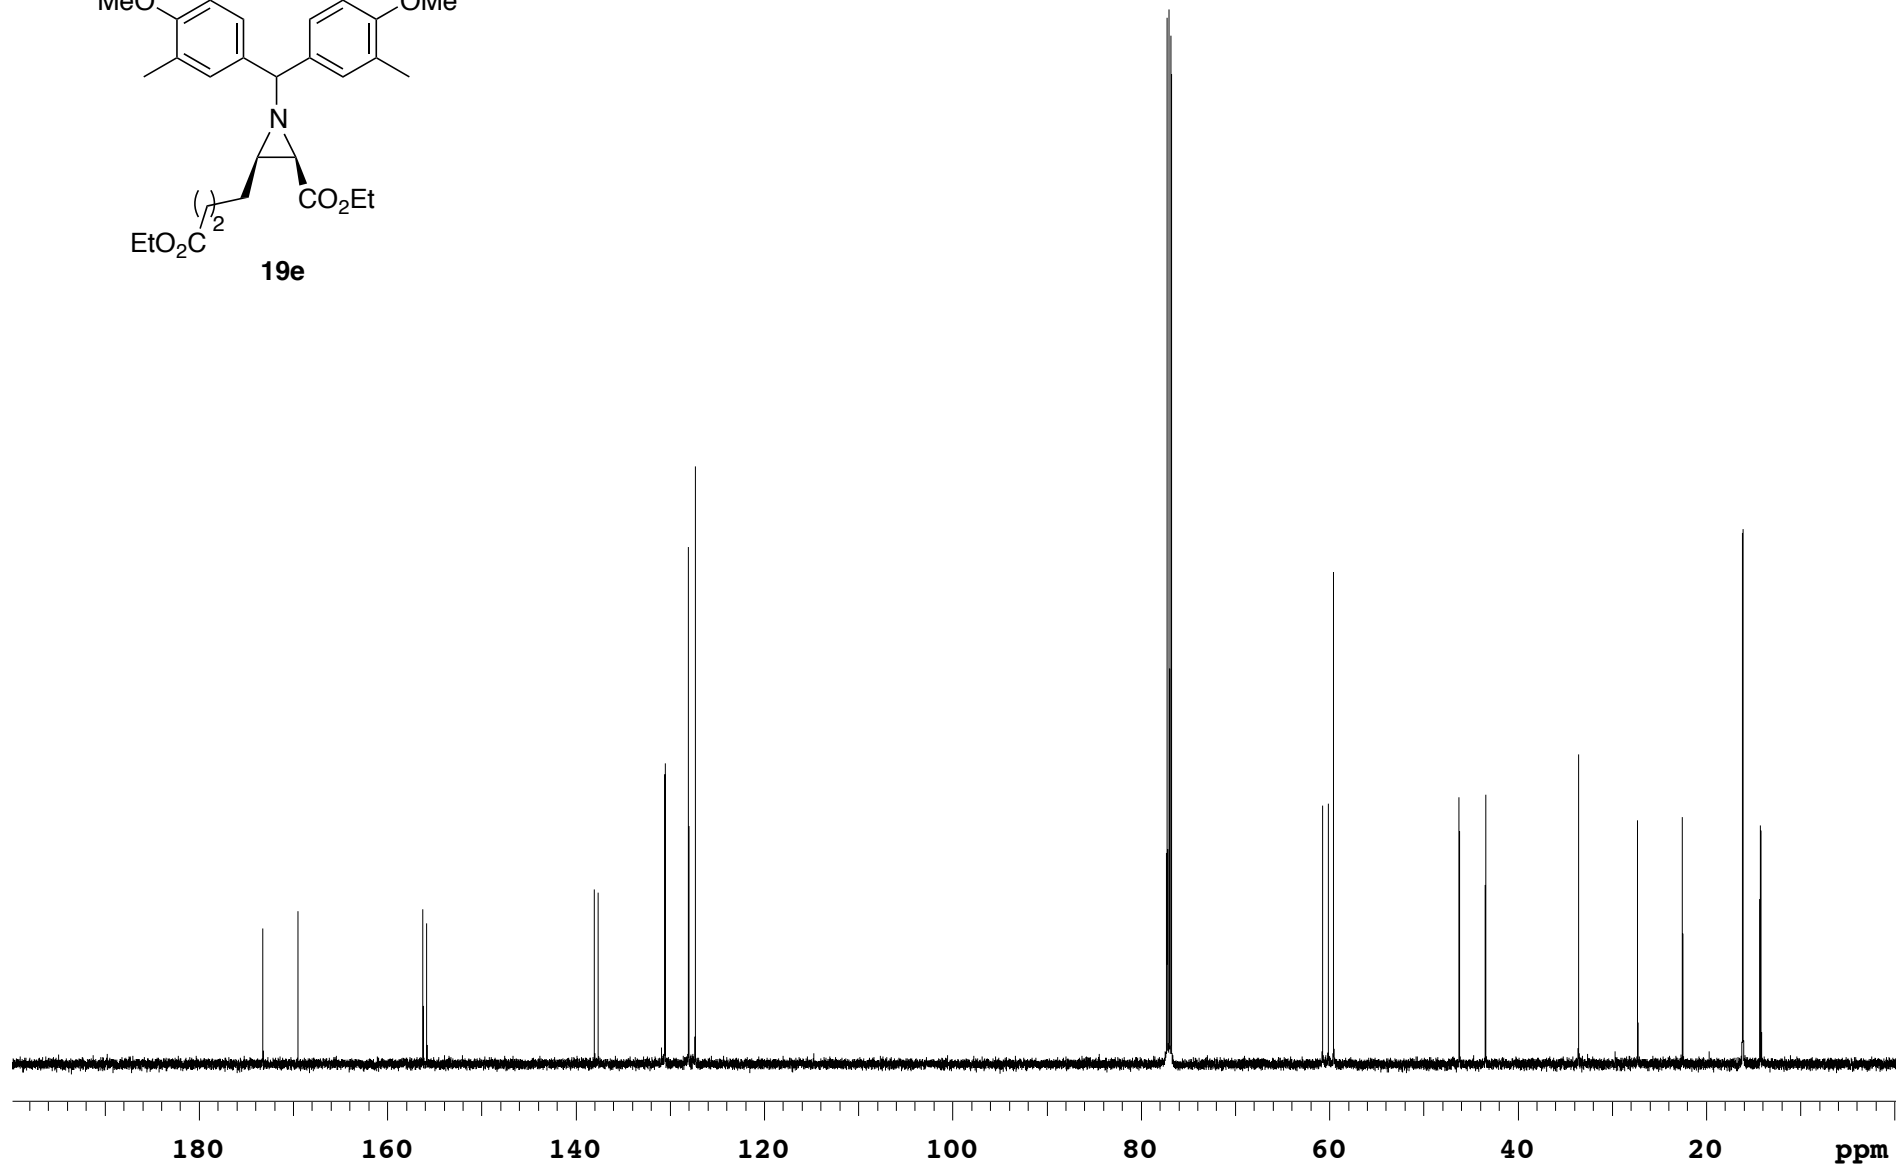

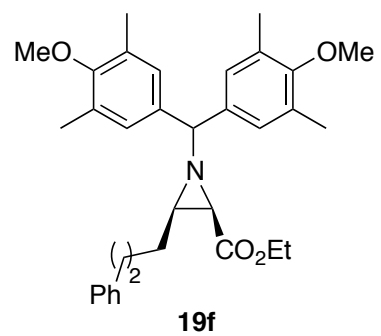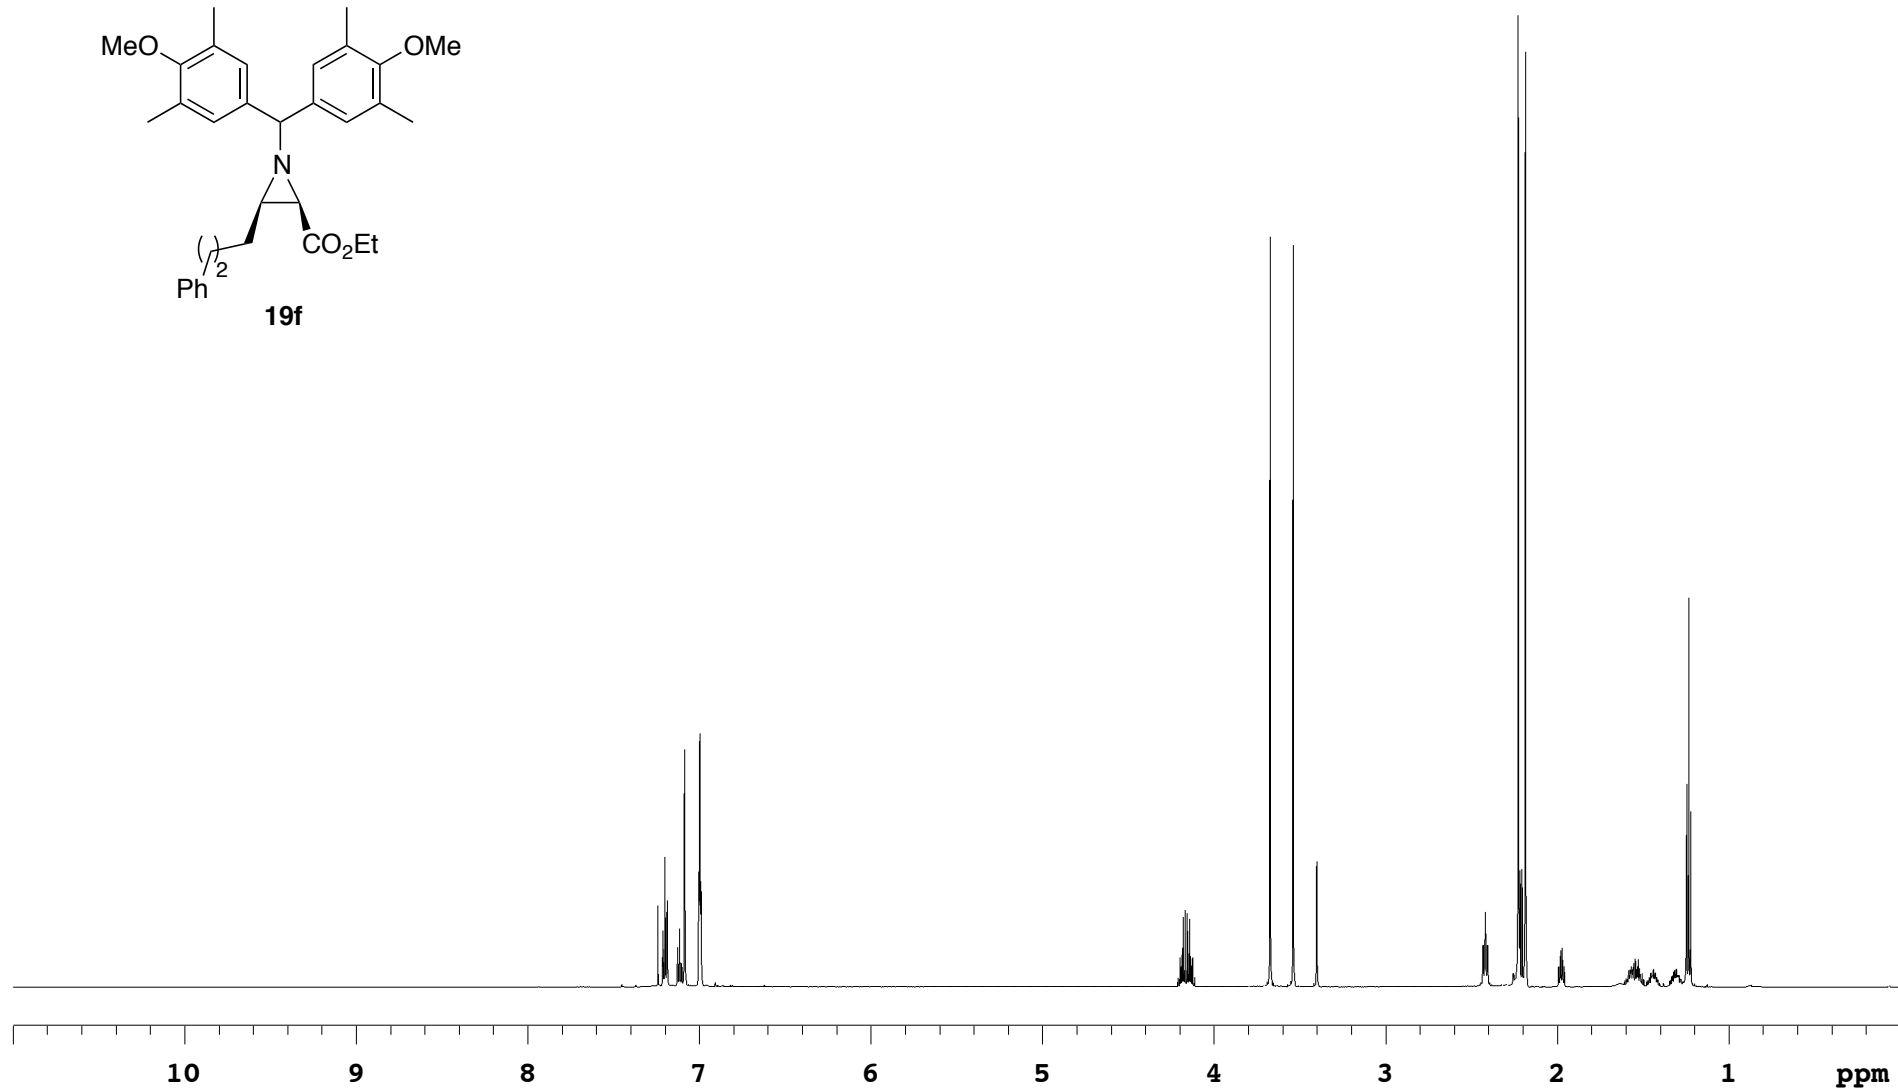

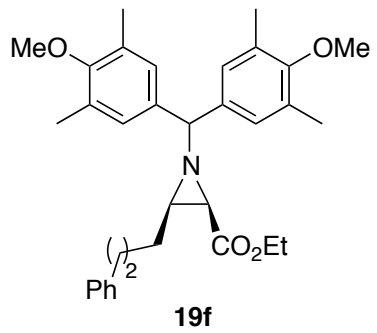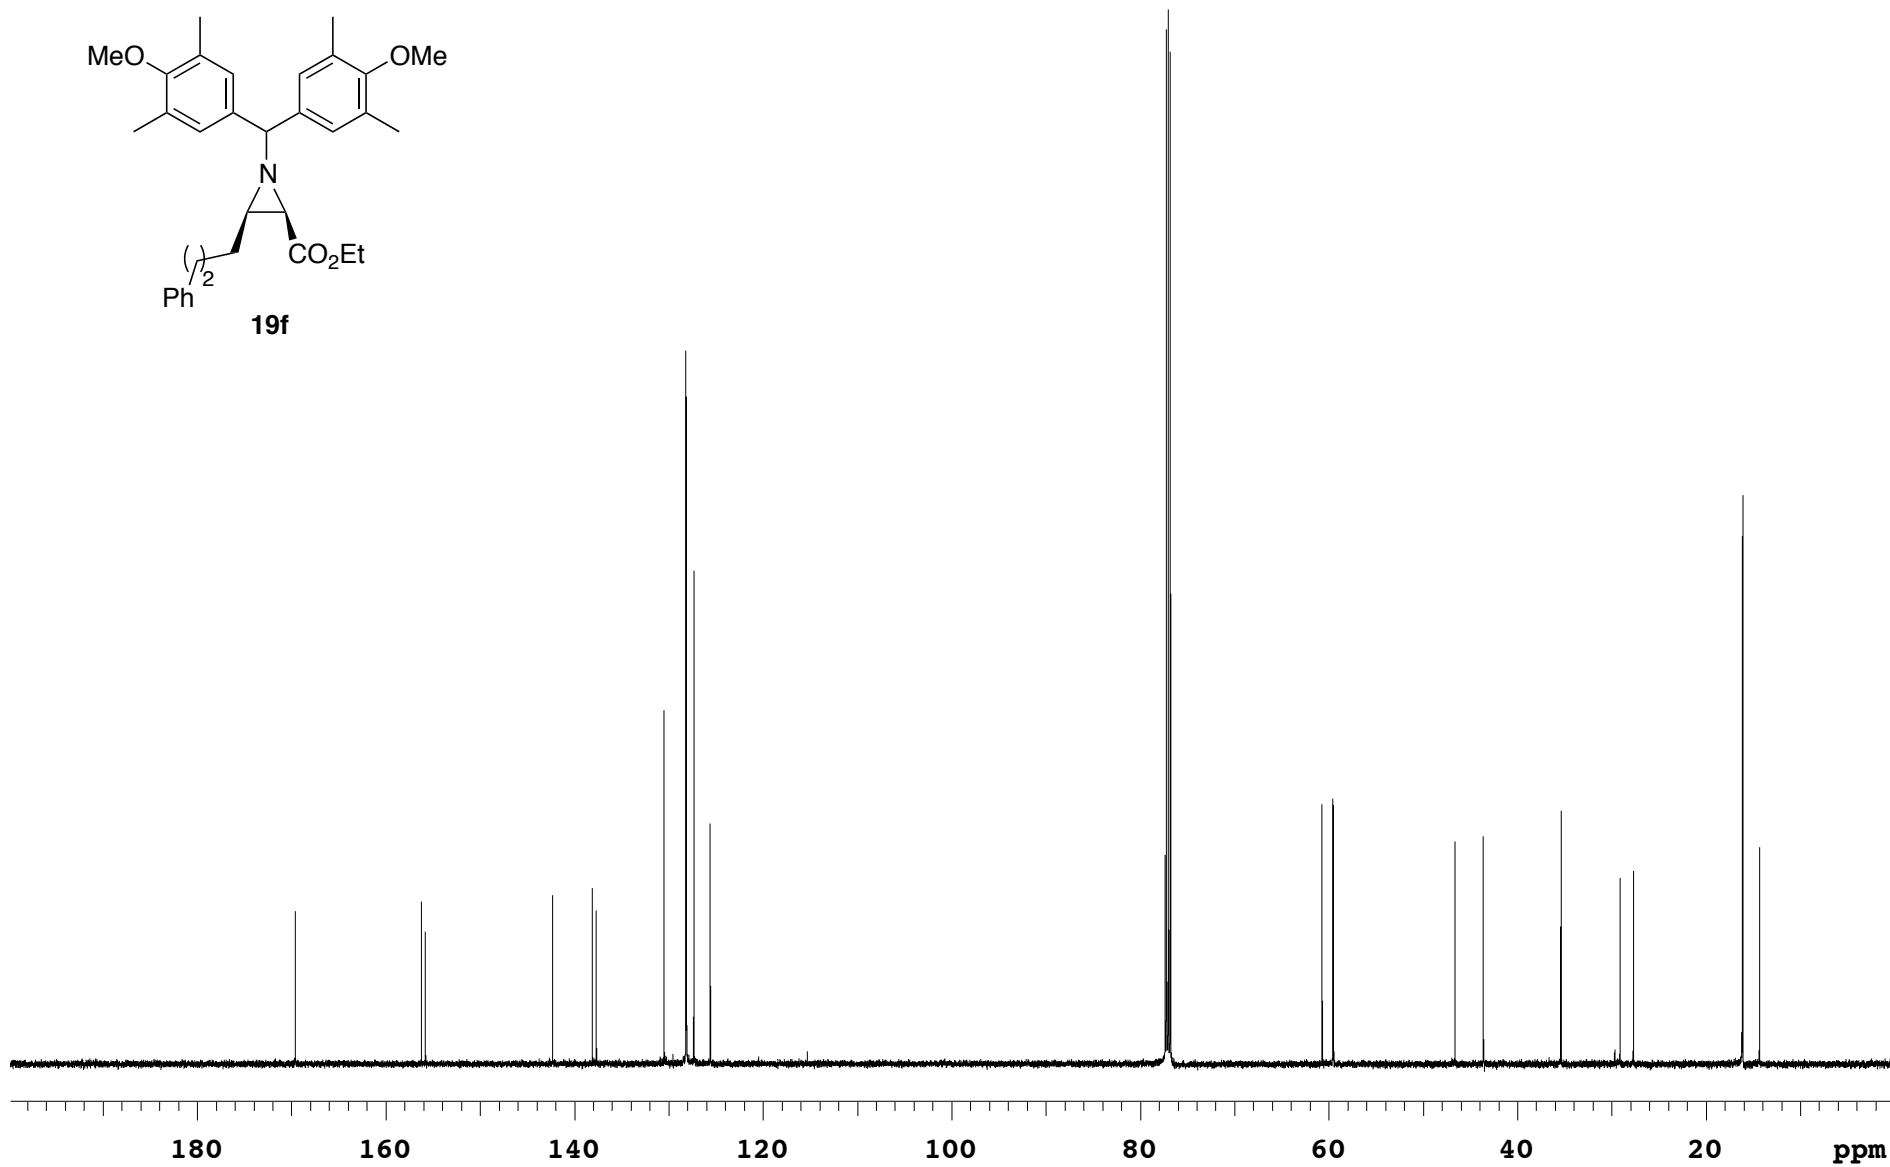

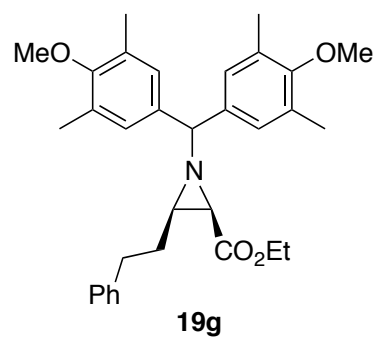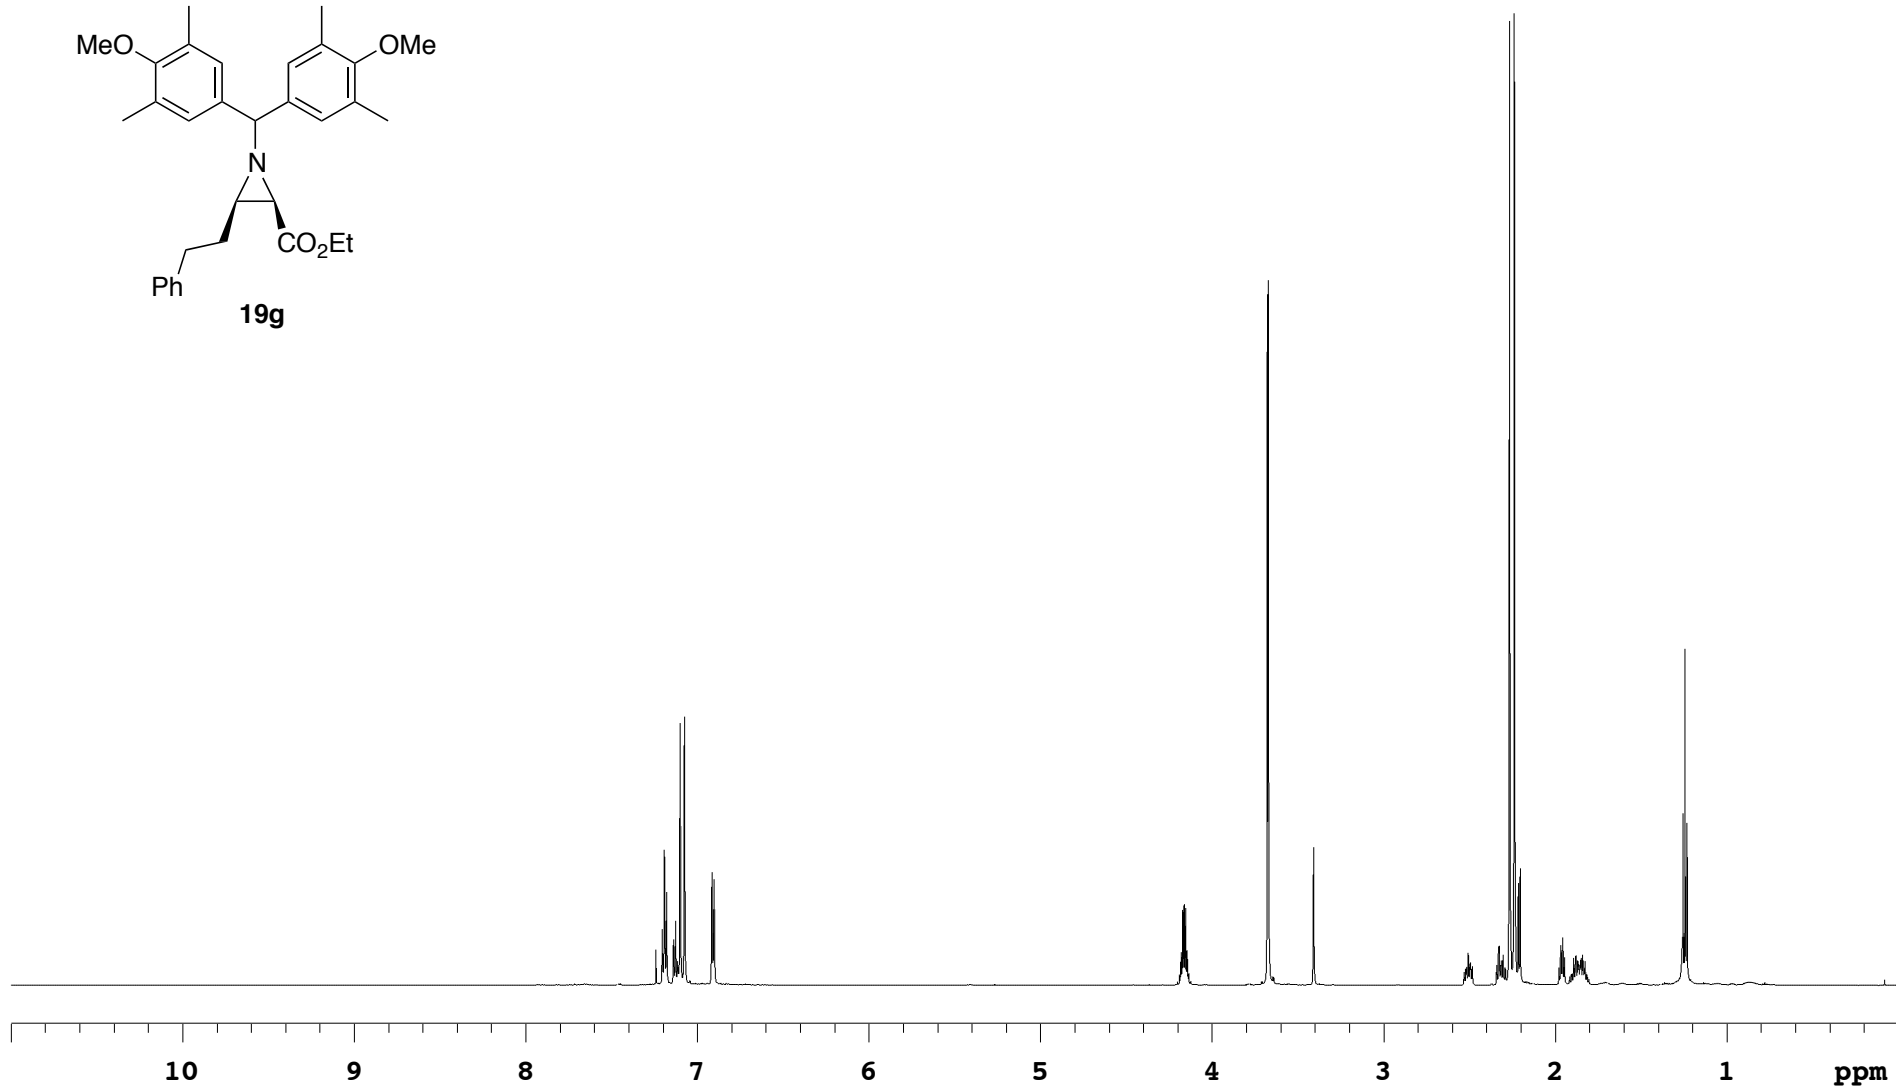



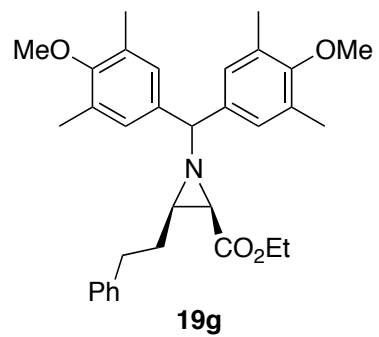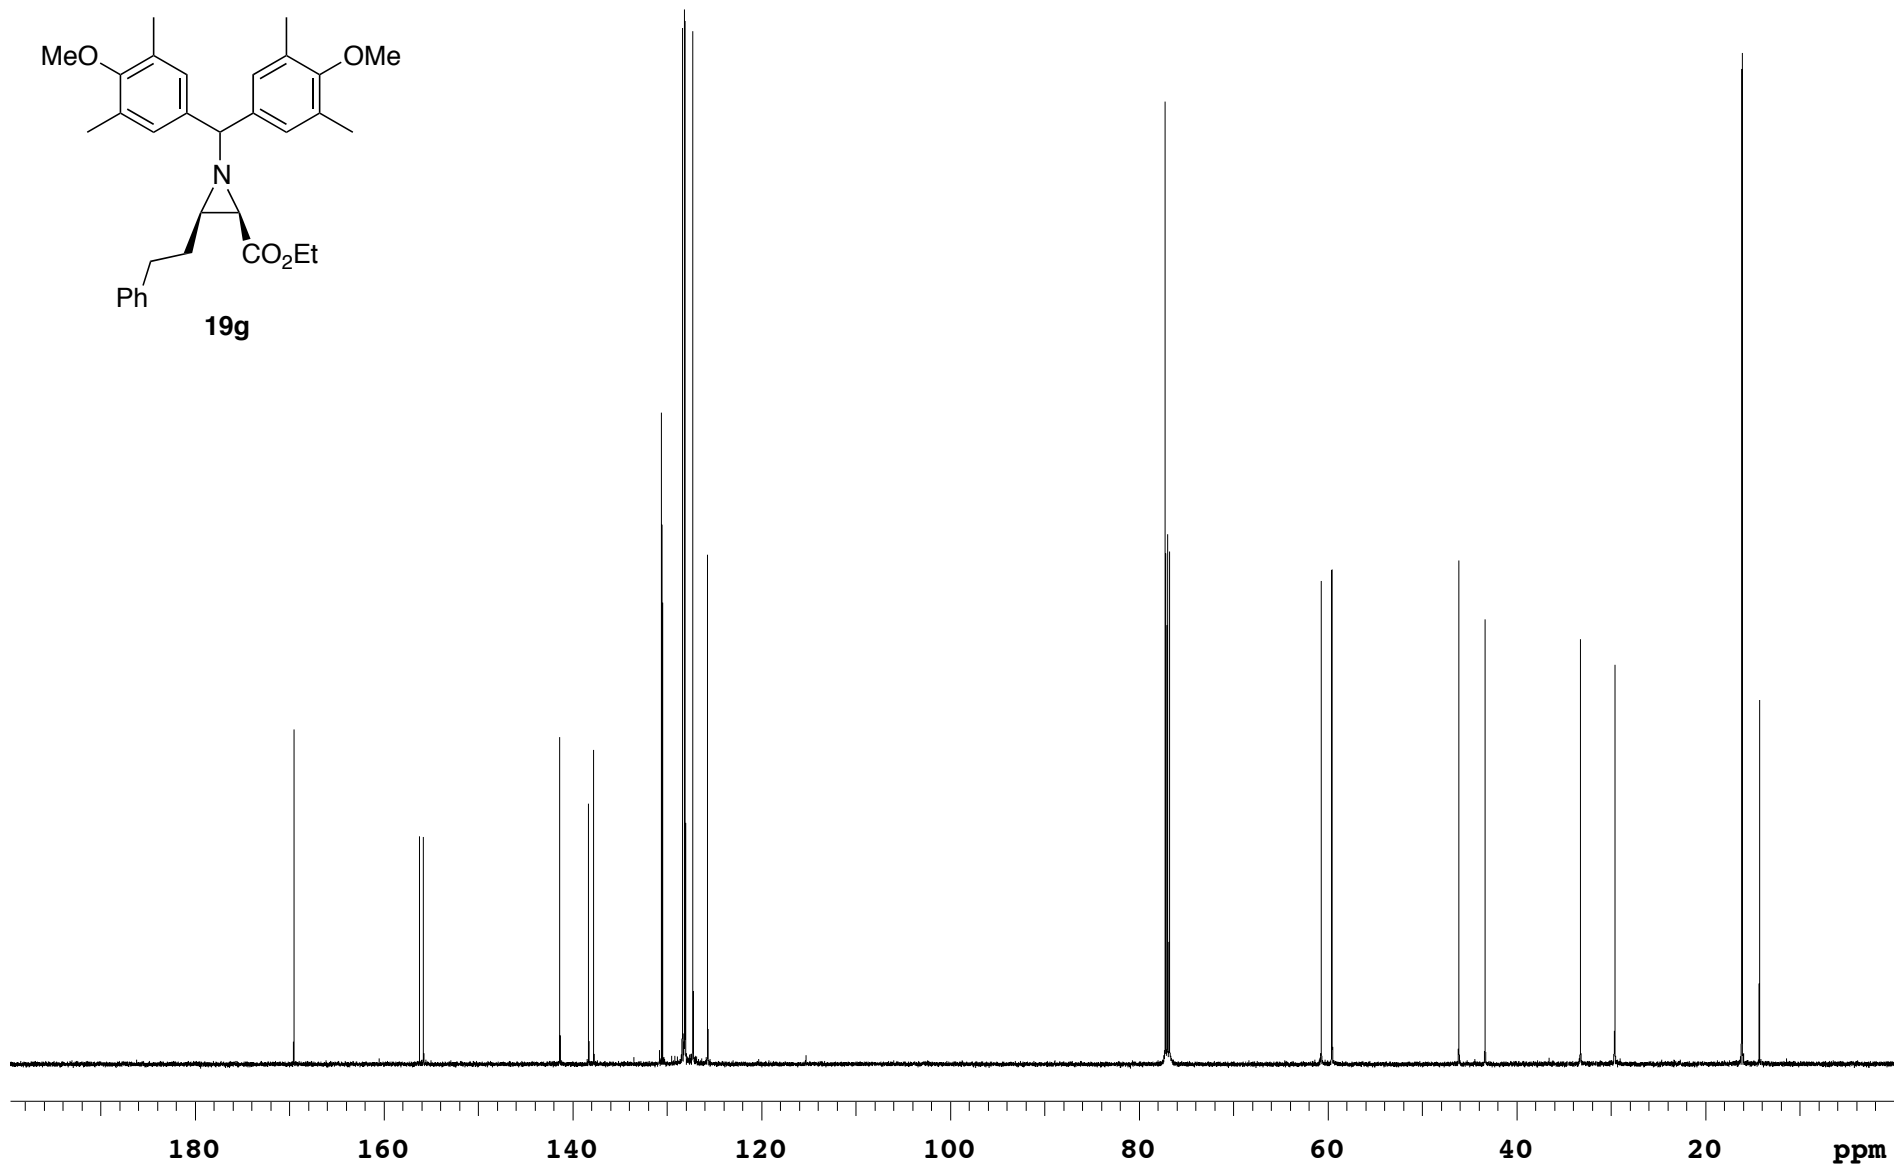

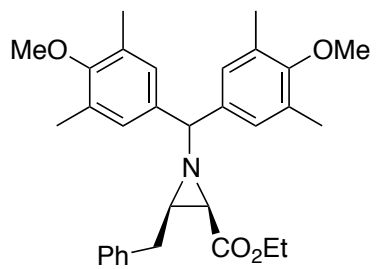

19h

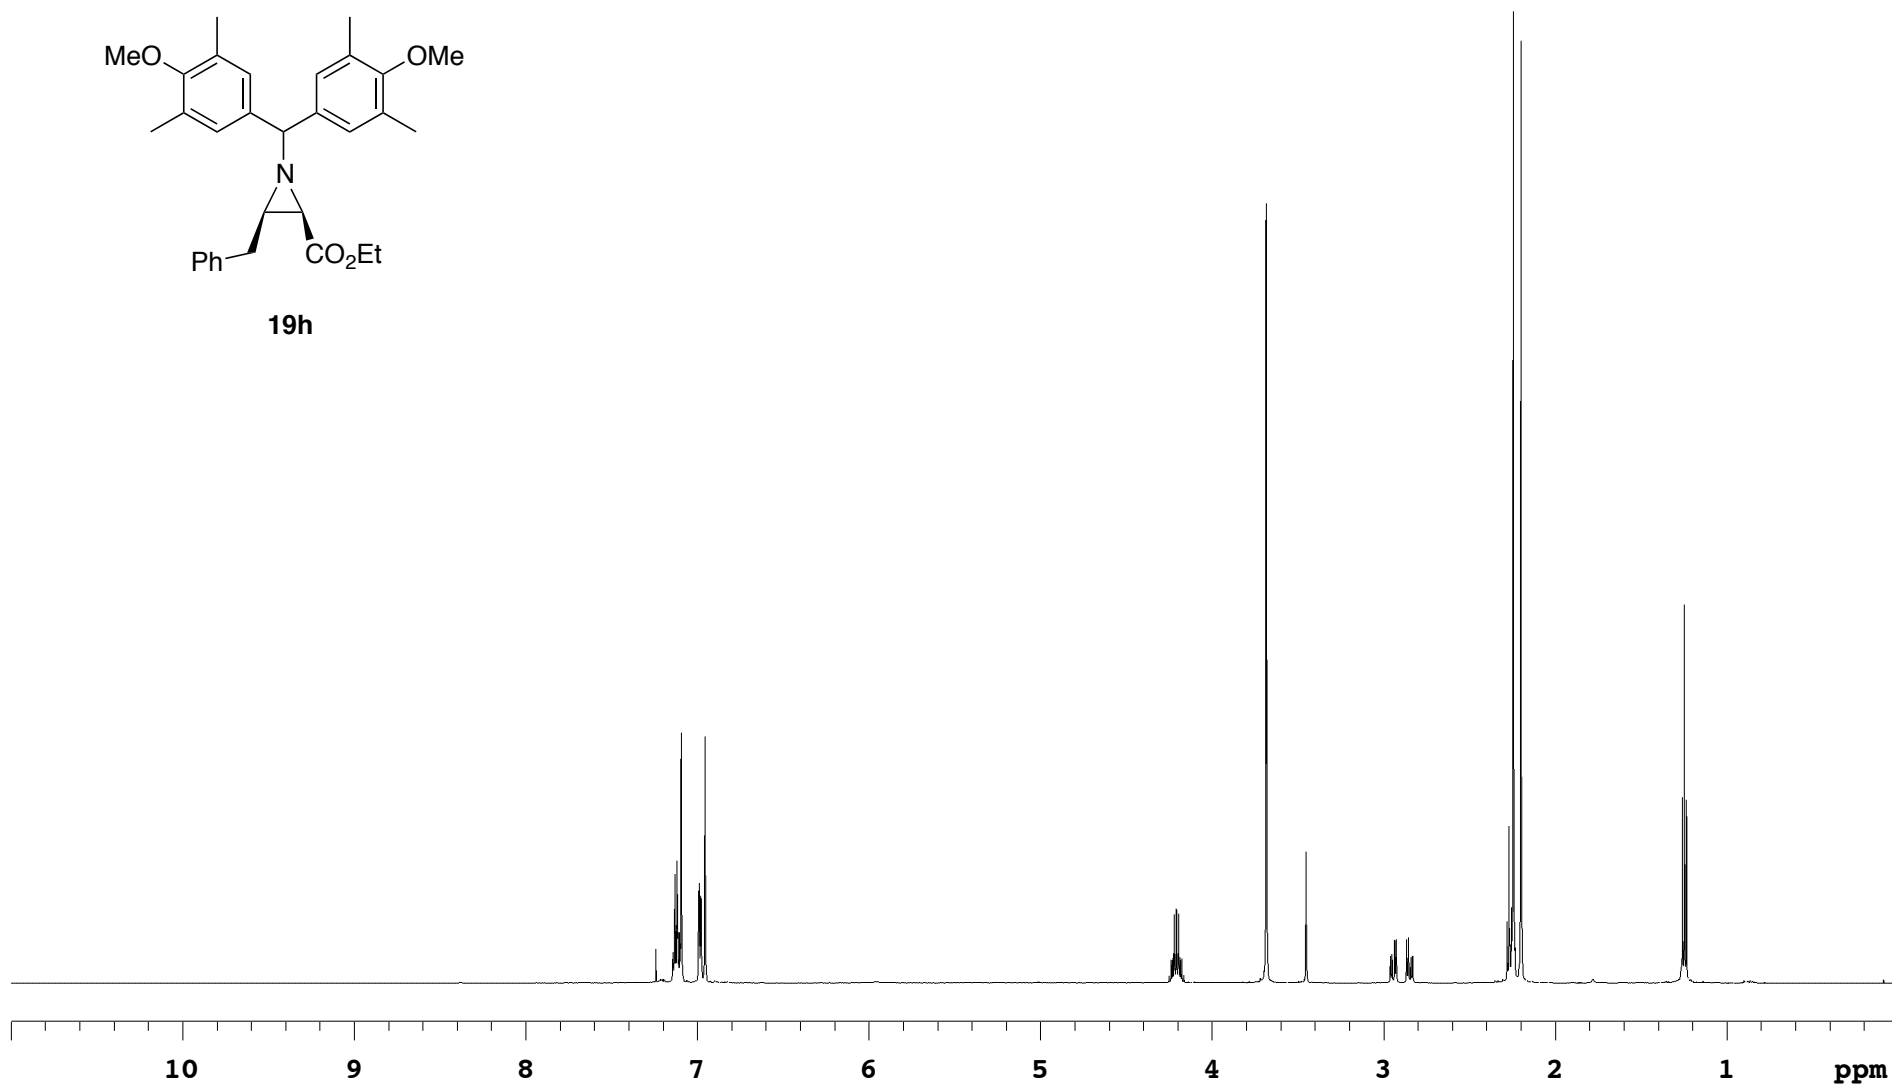

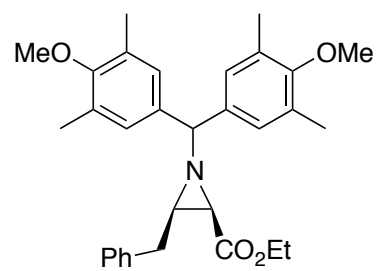

19h

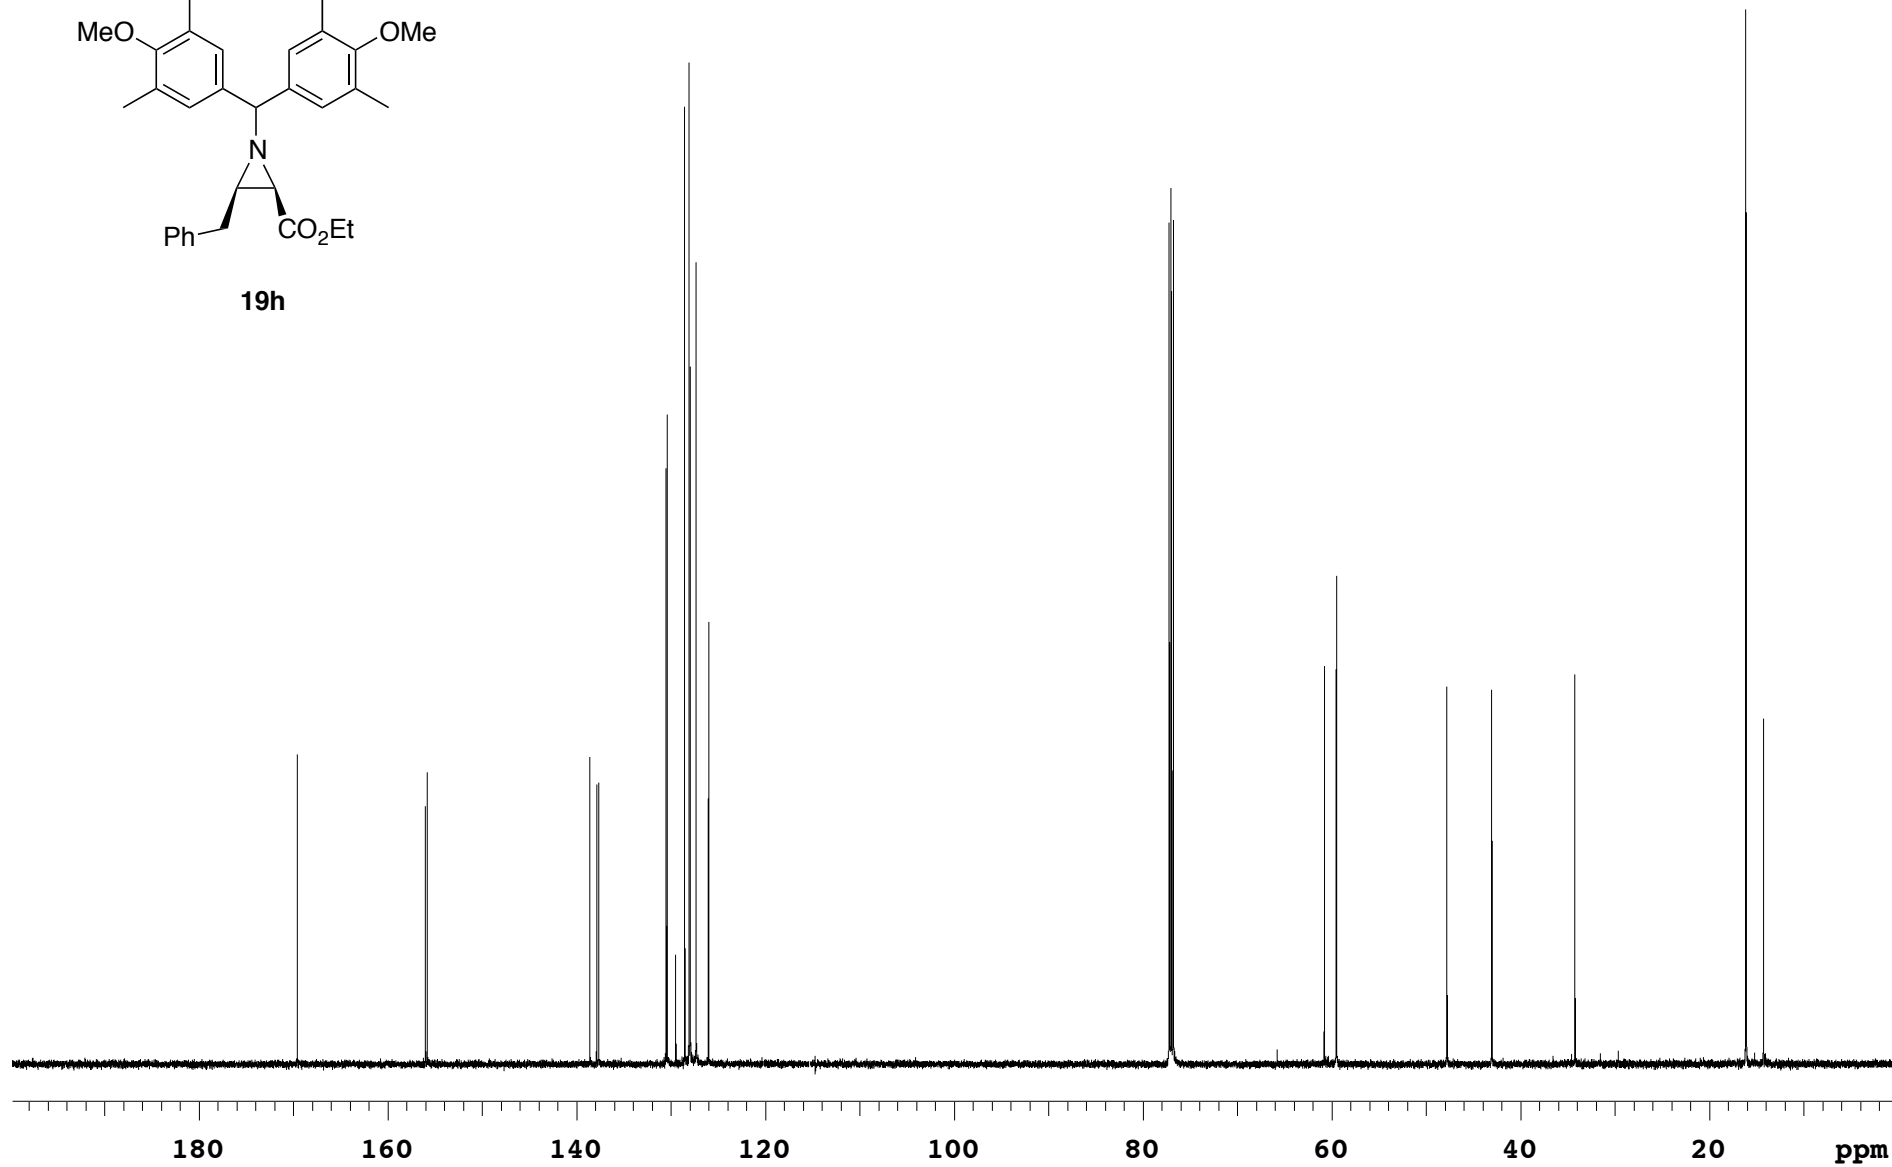

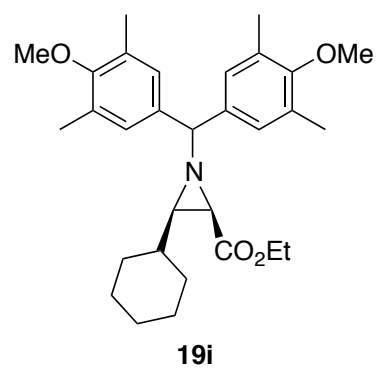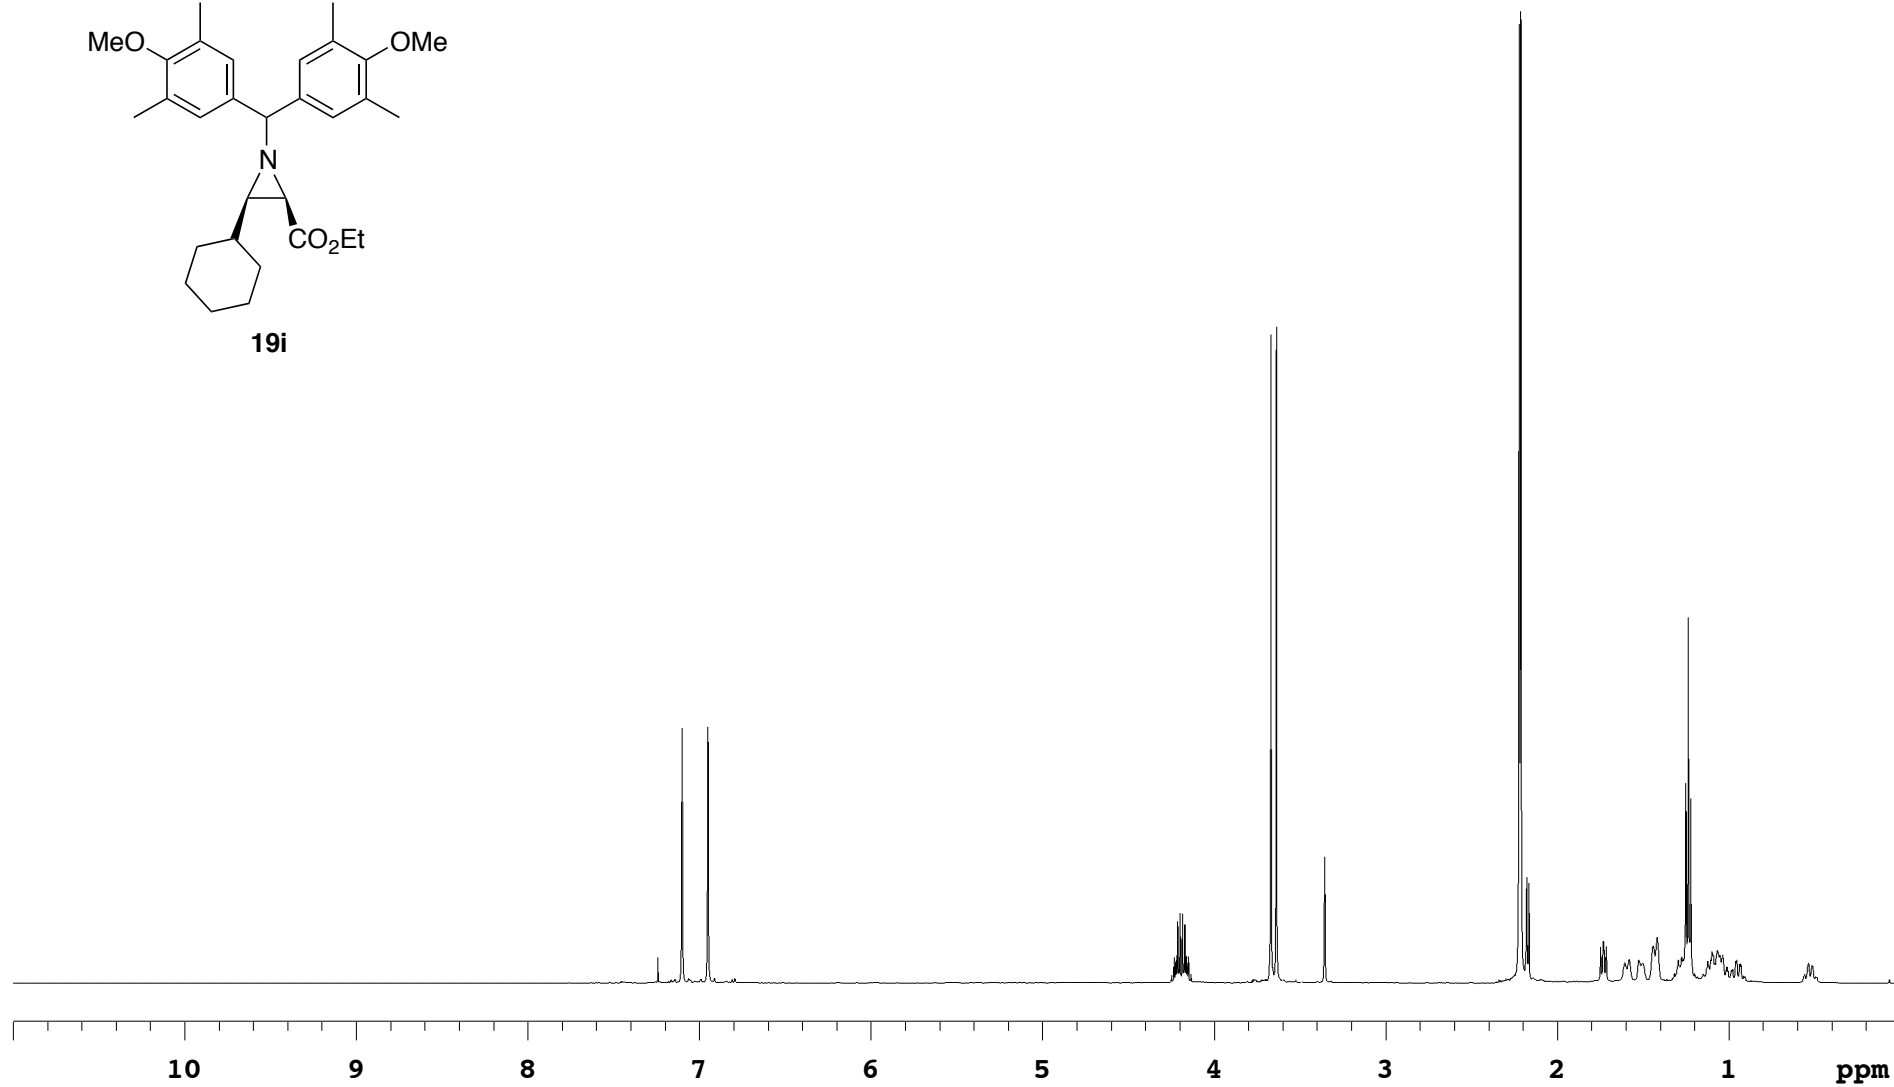

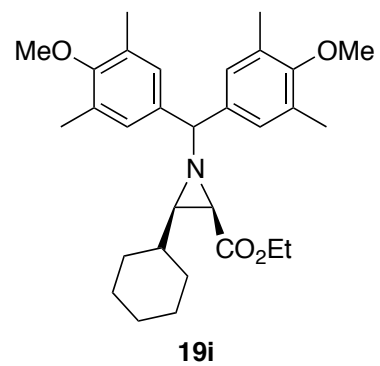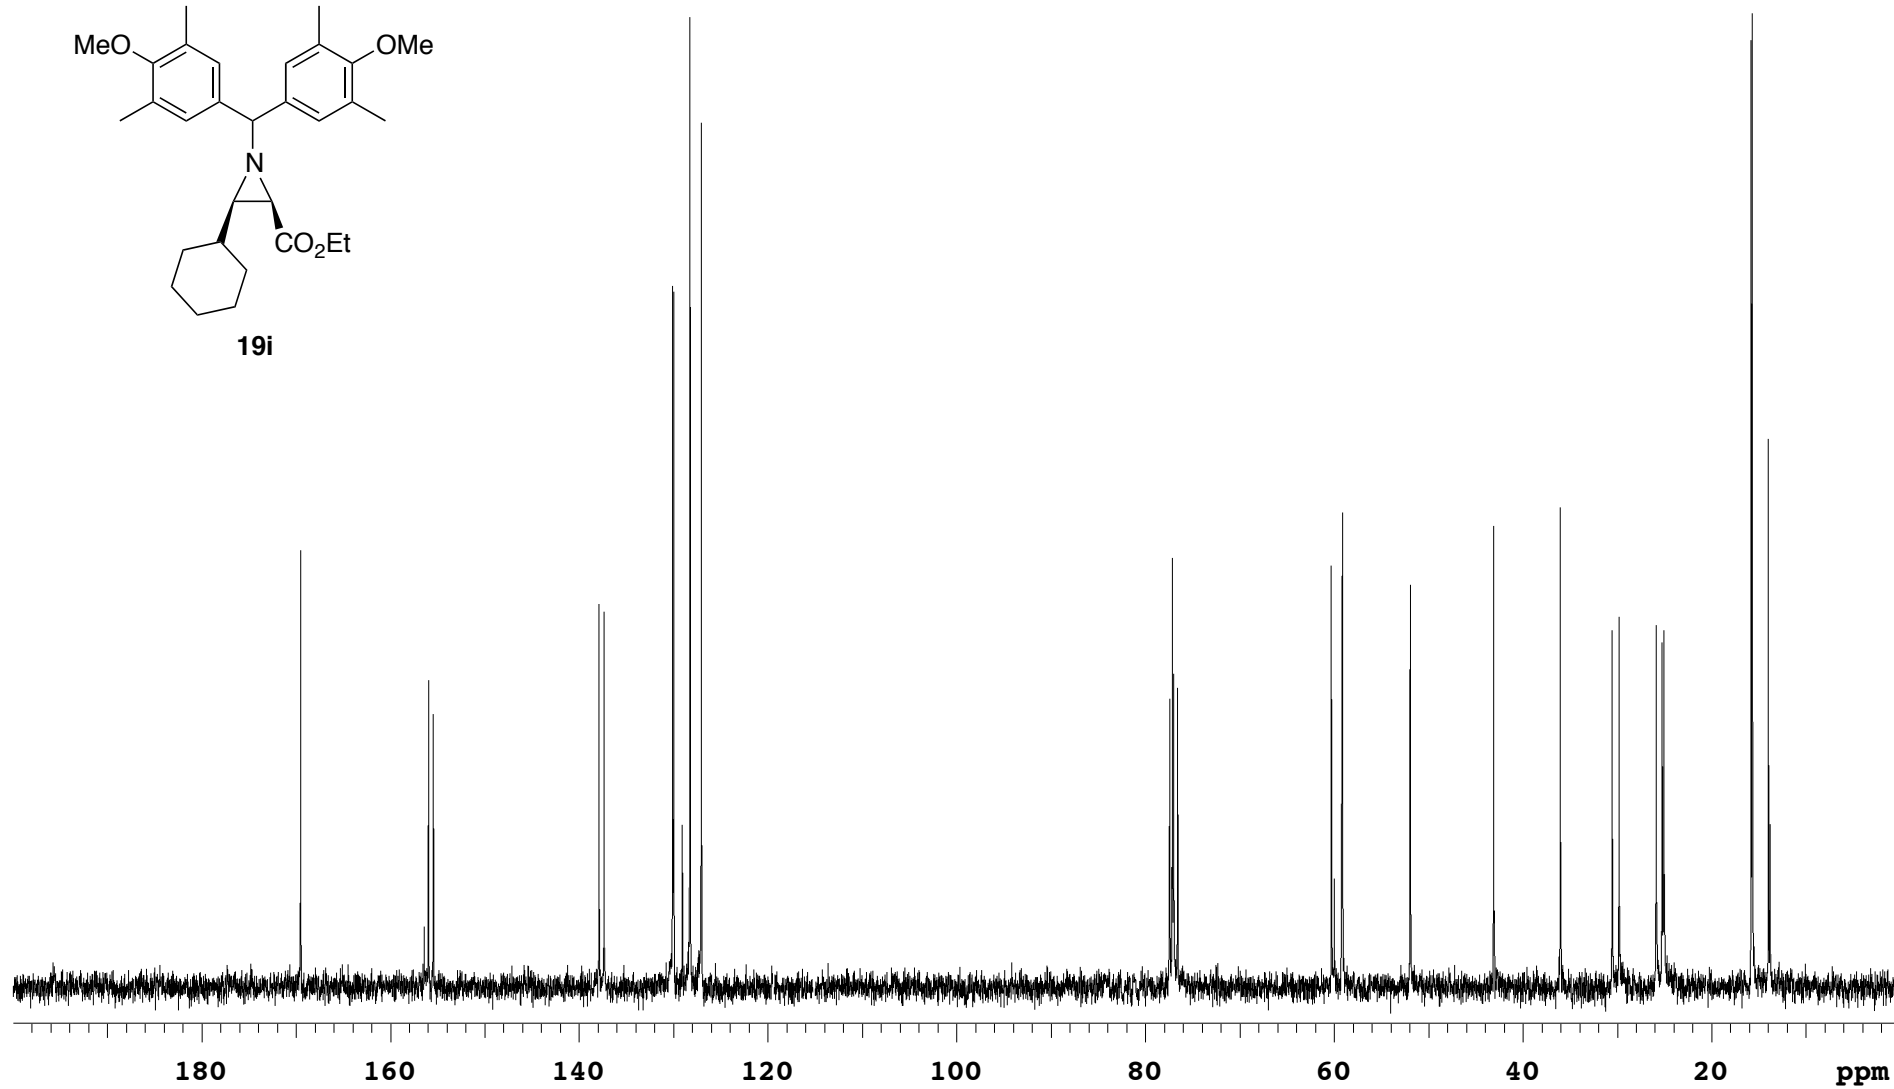

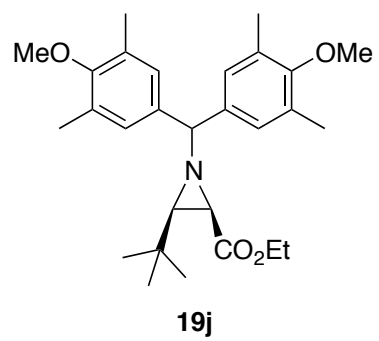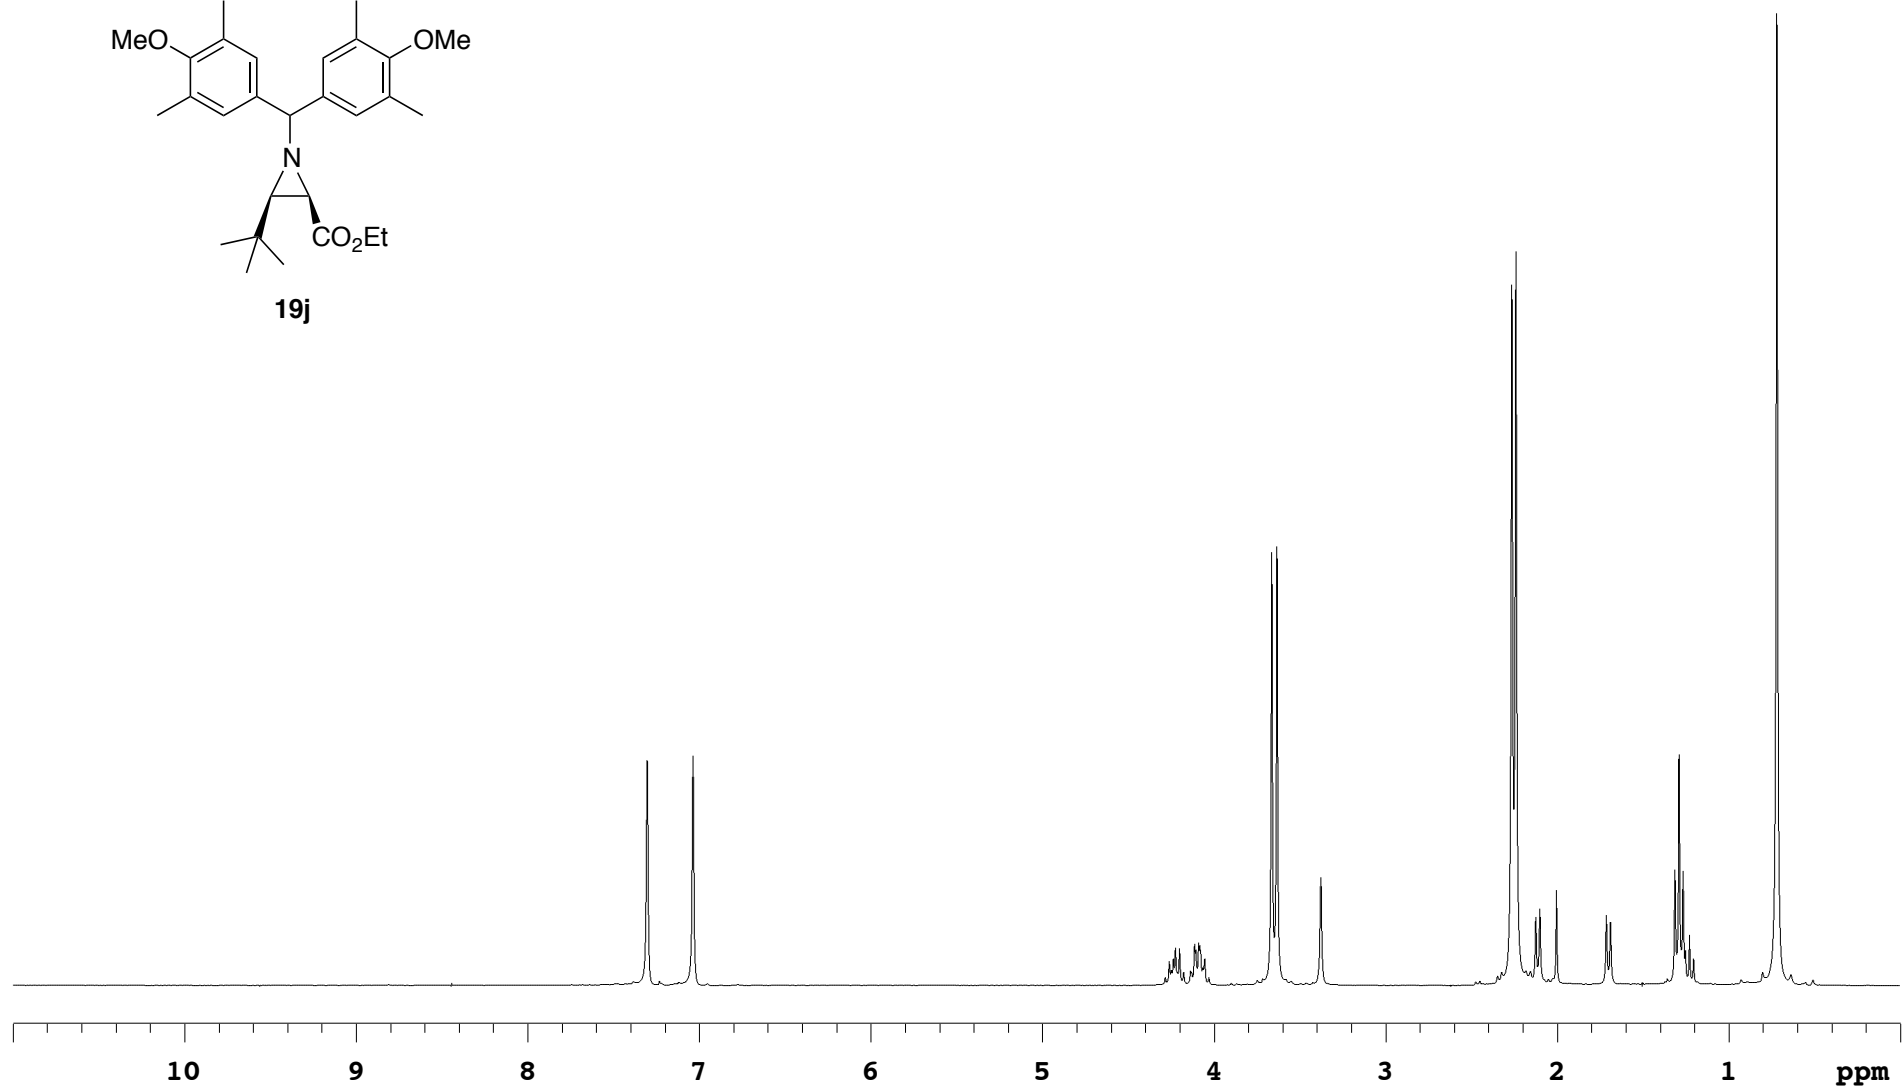

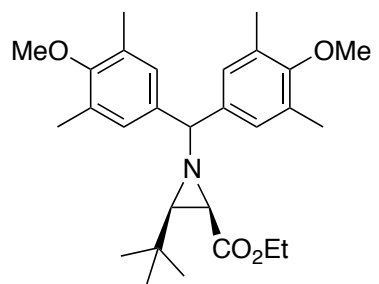

19j

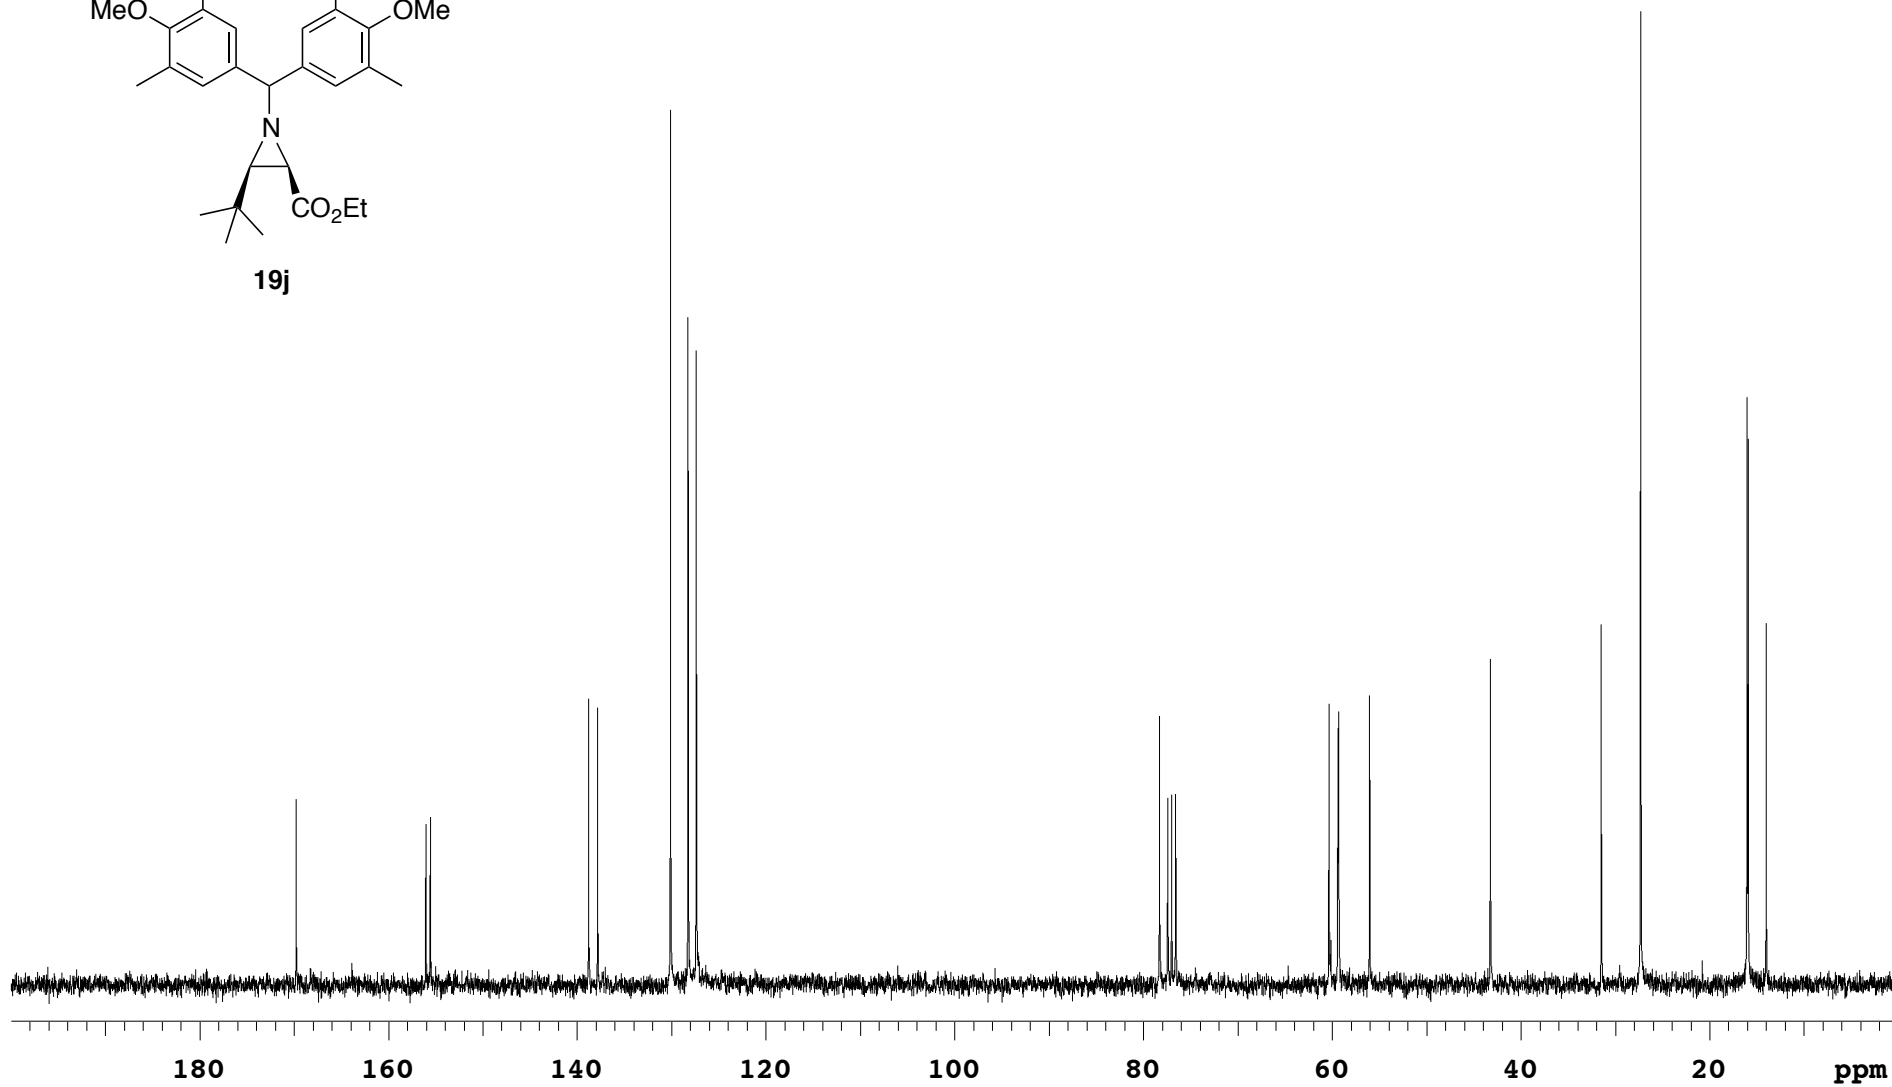

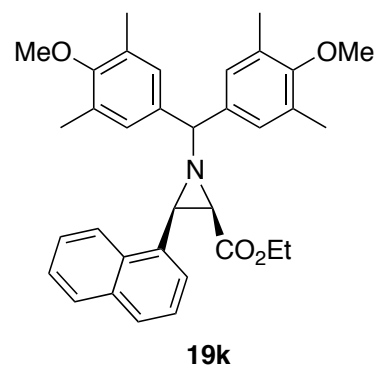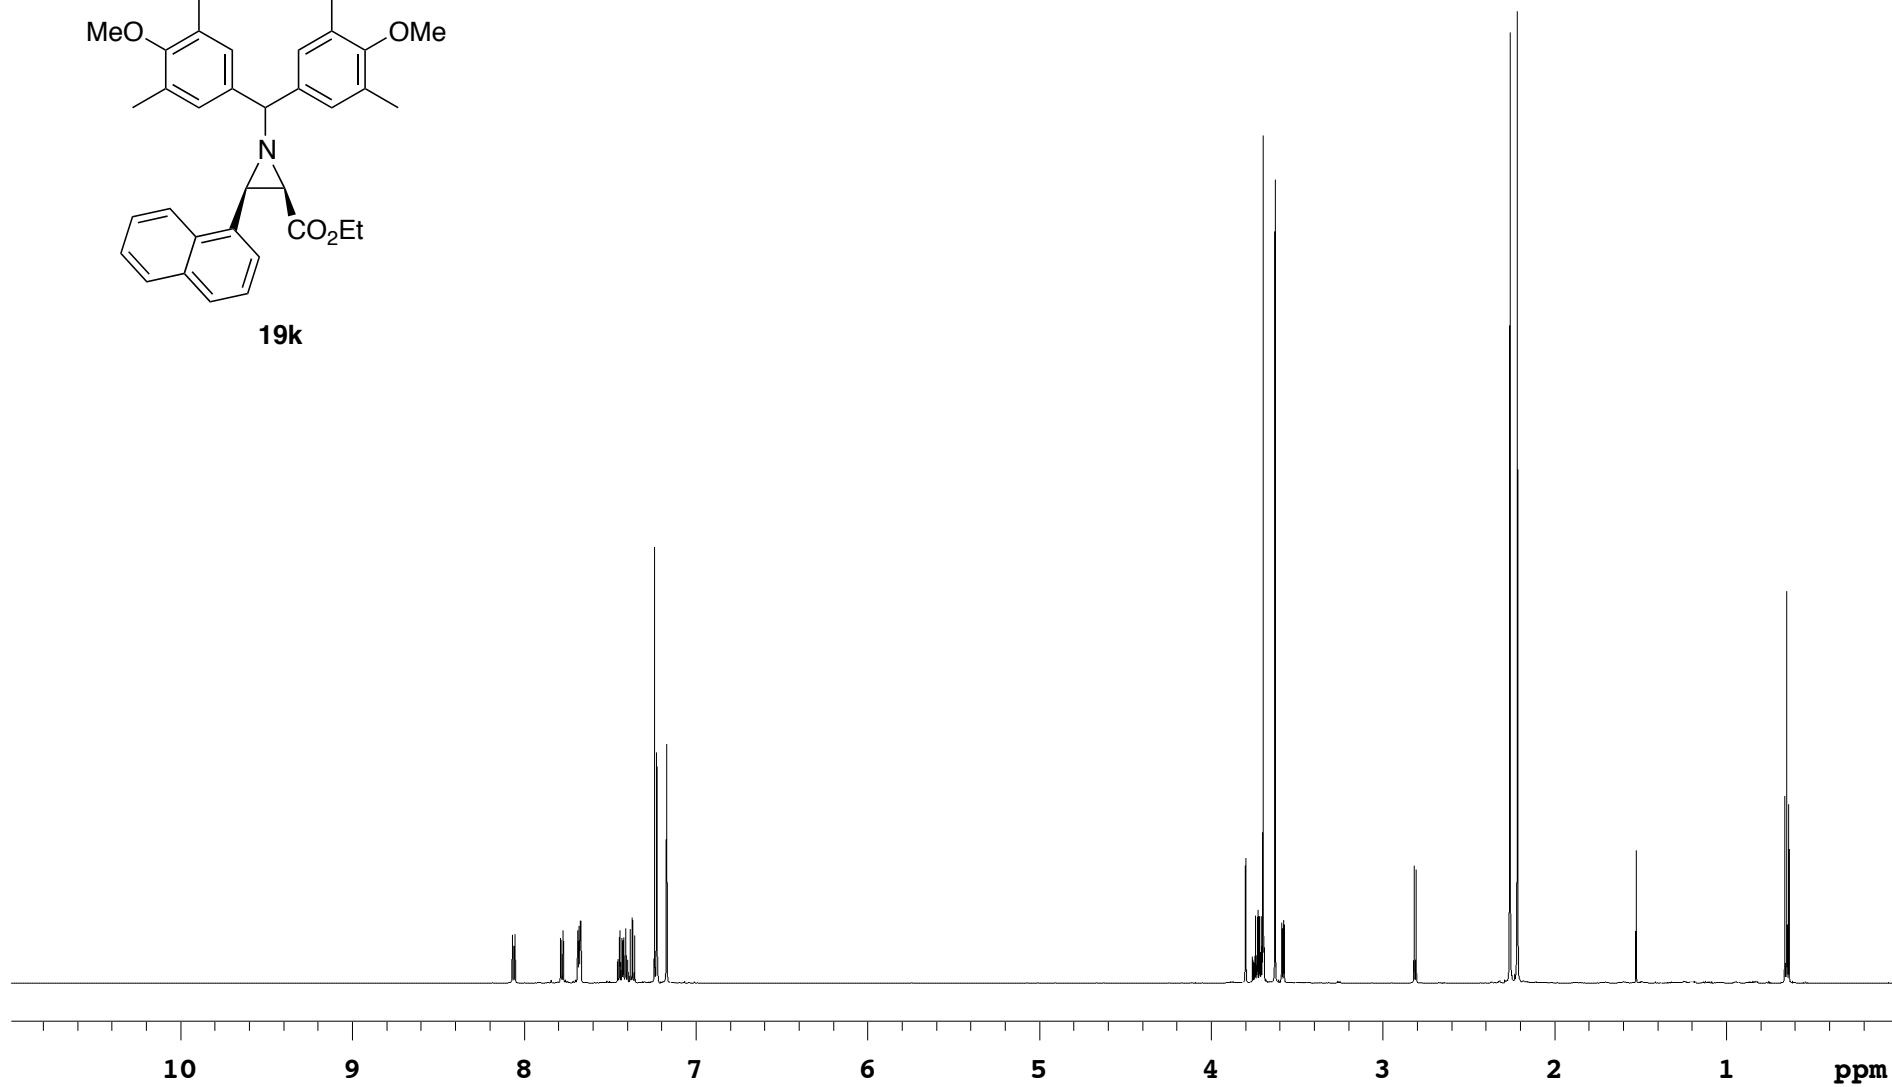



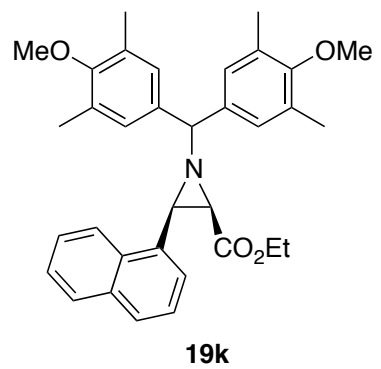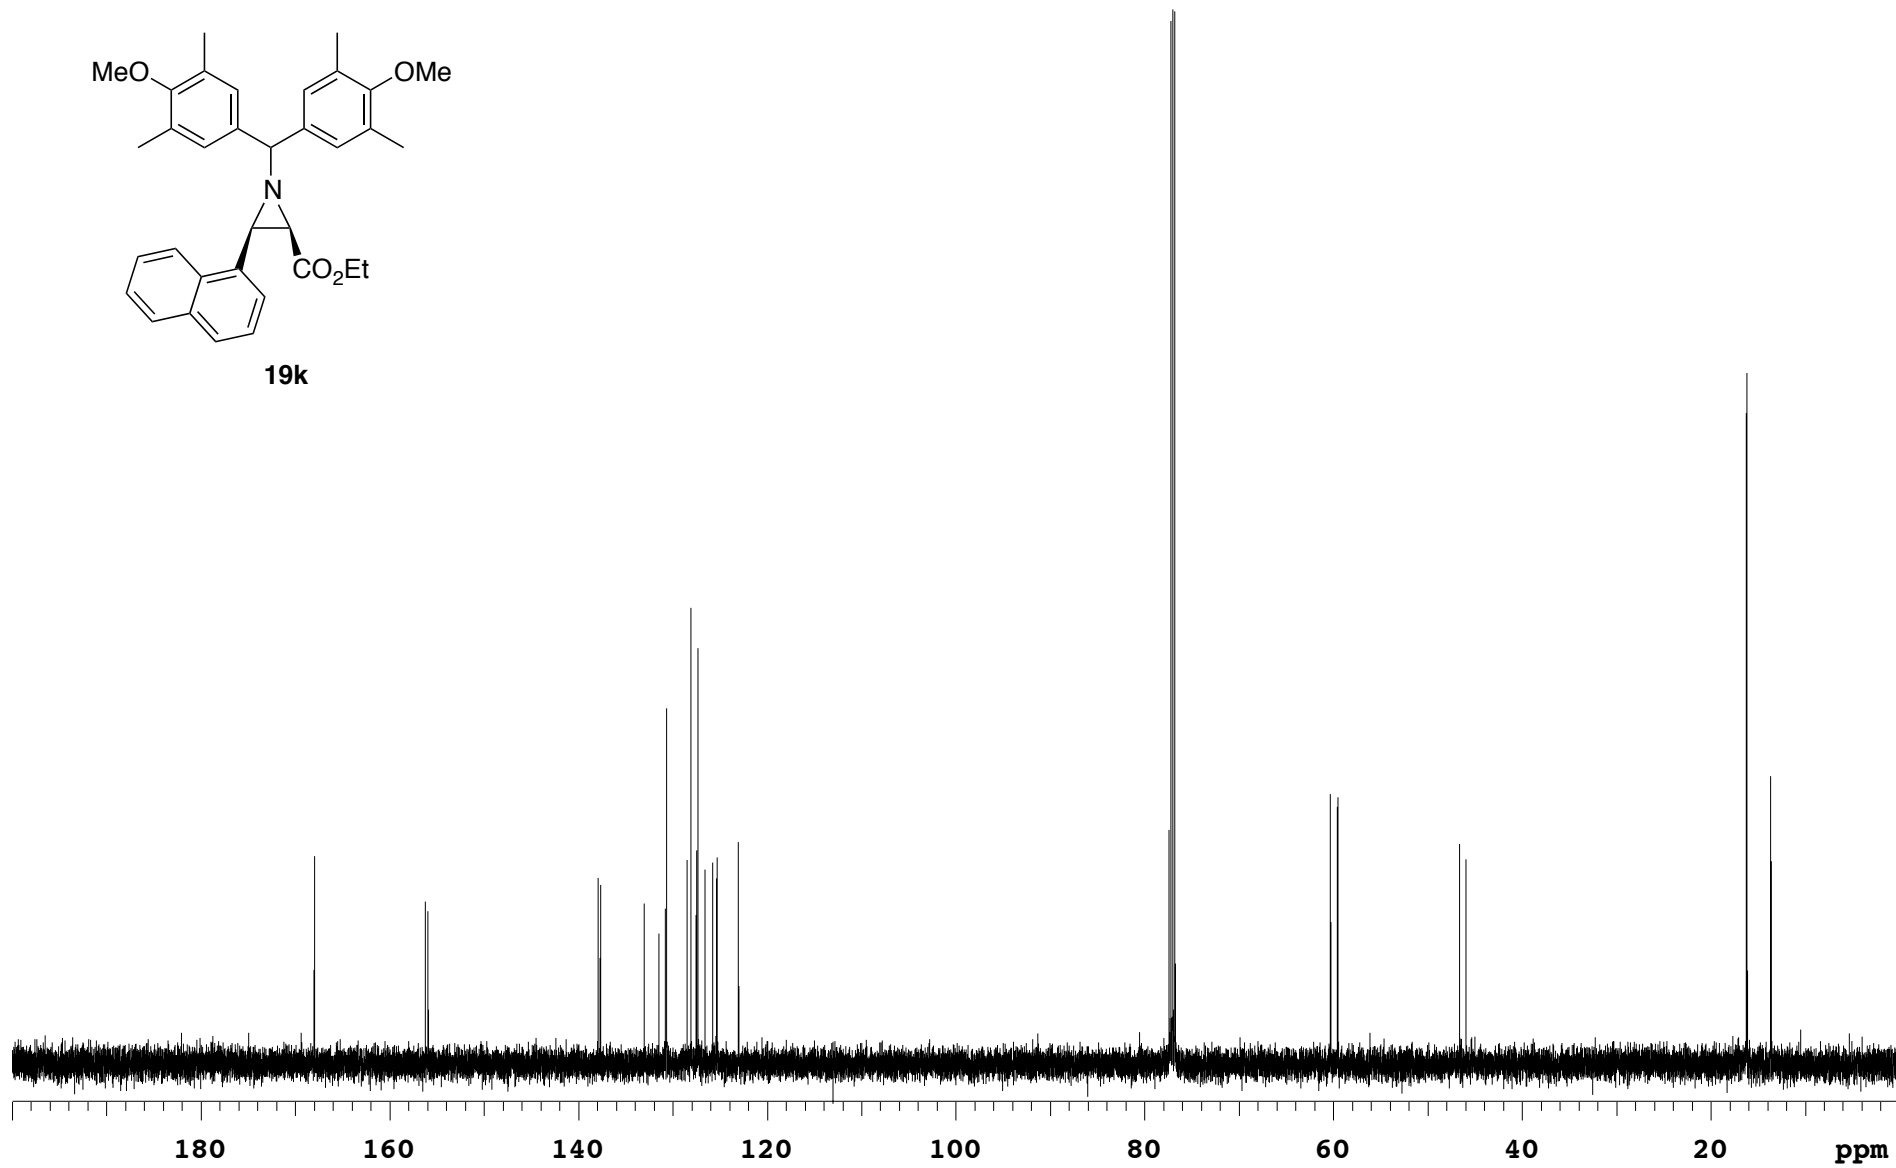

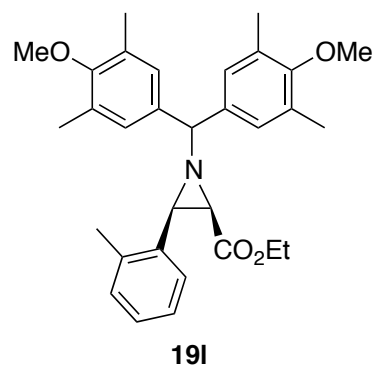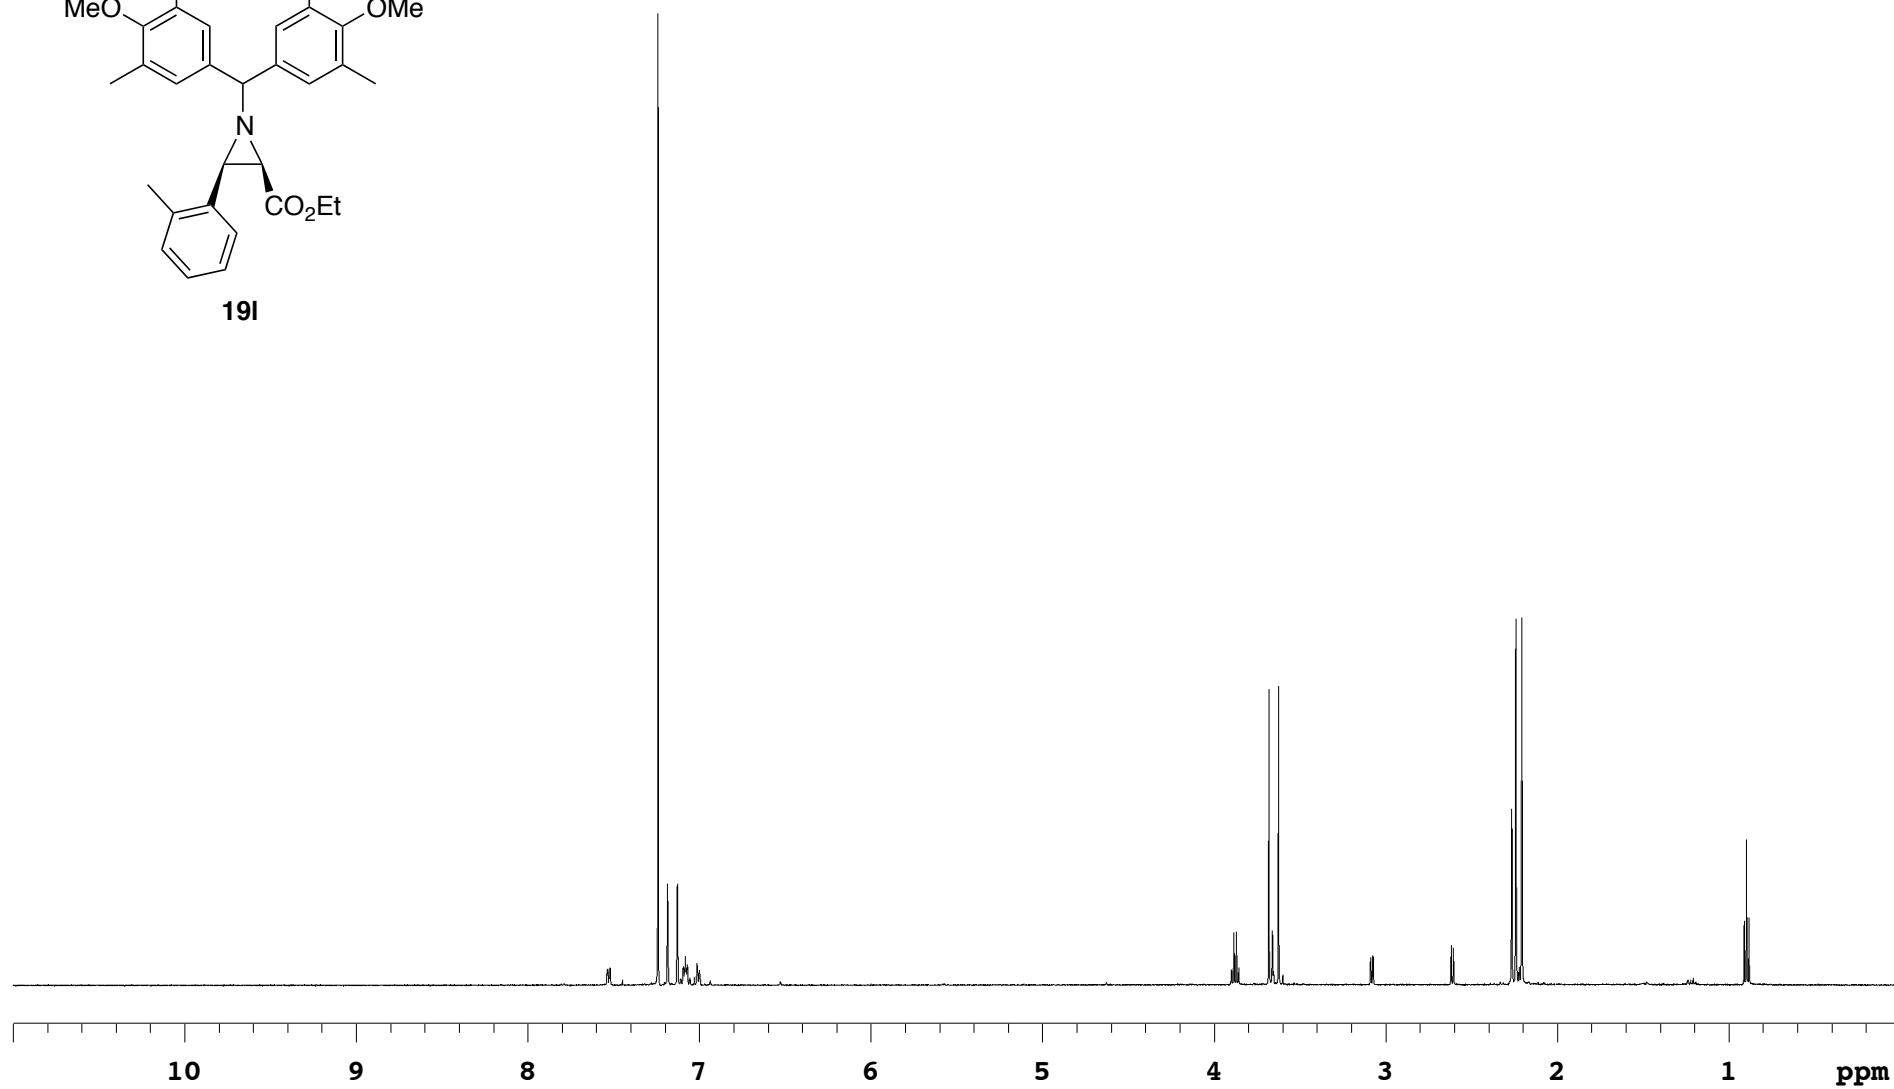

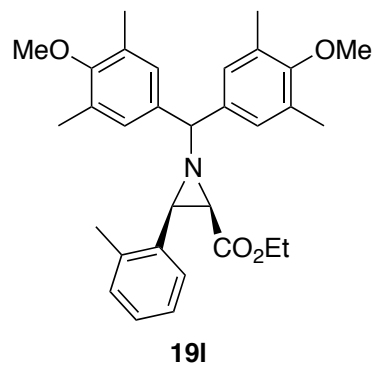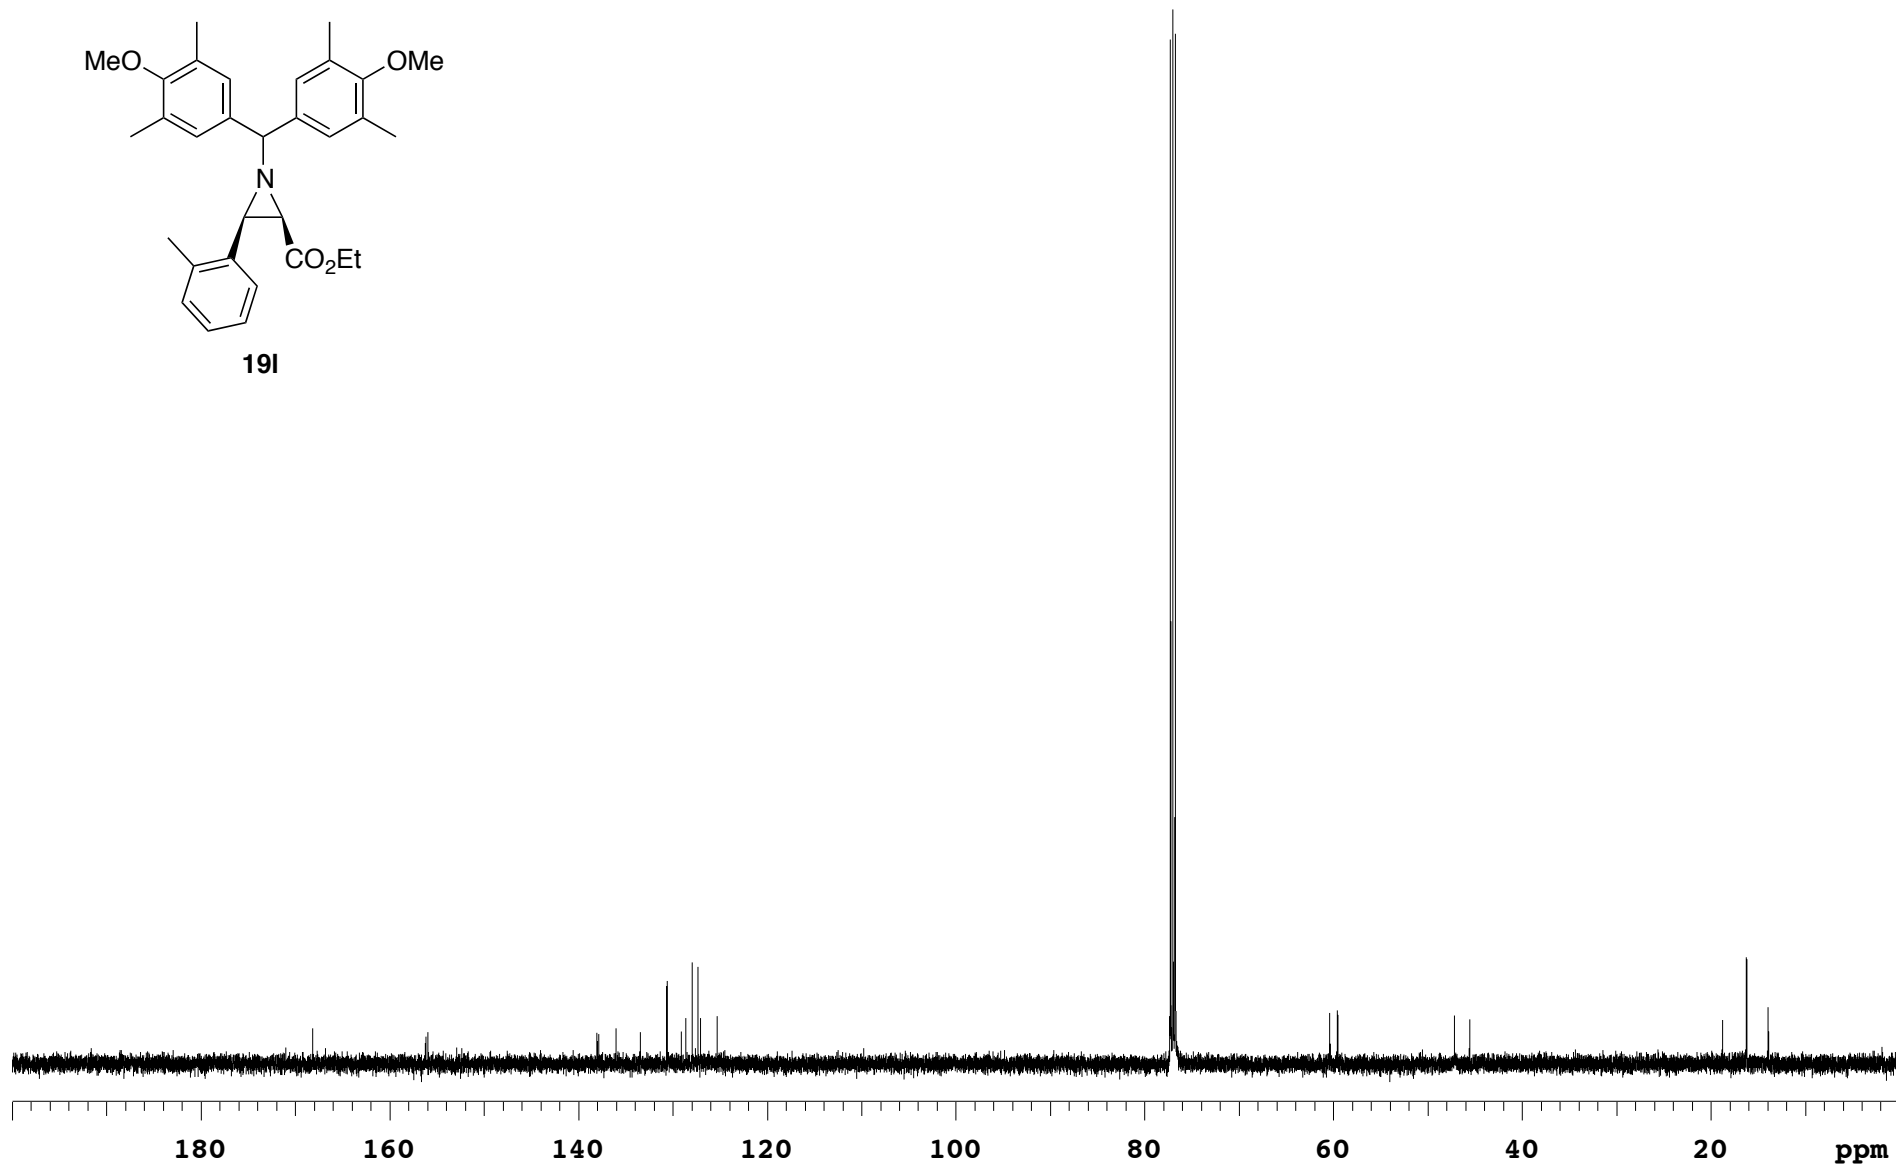

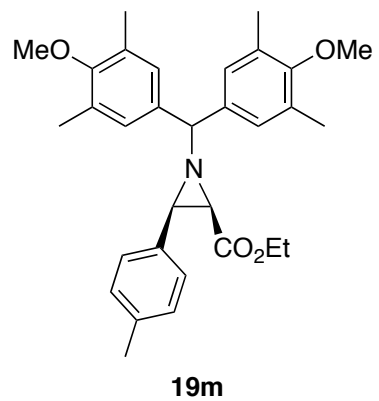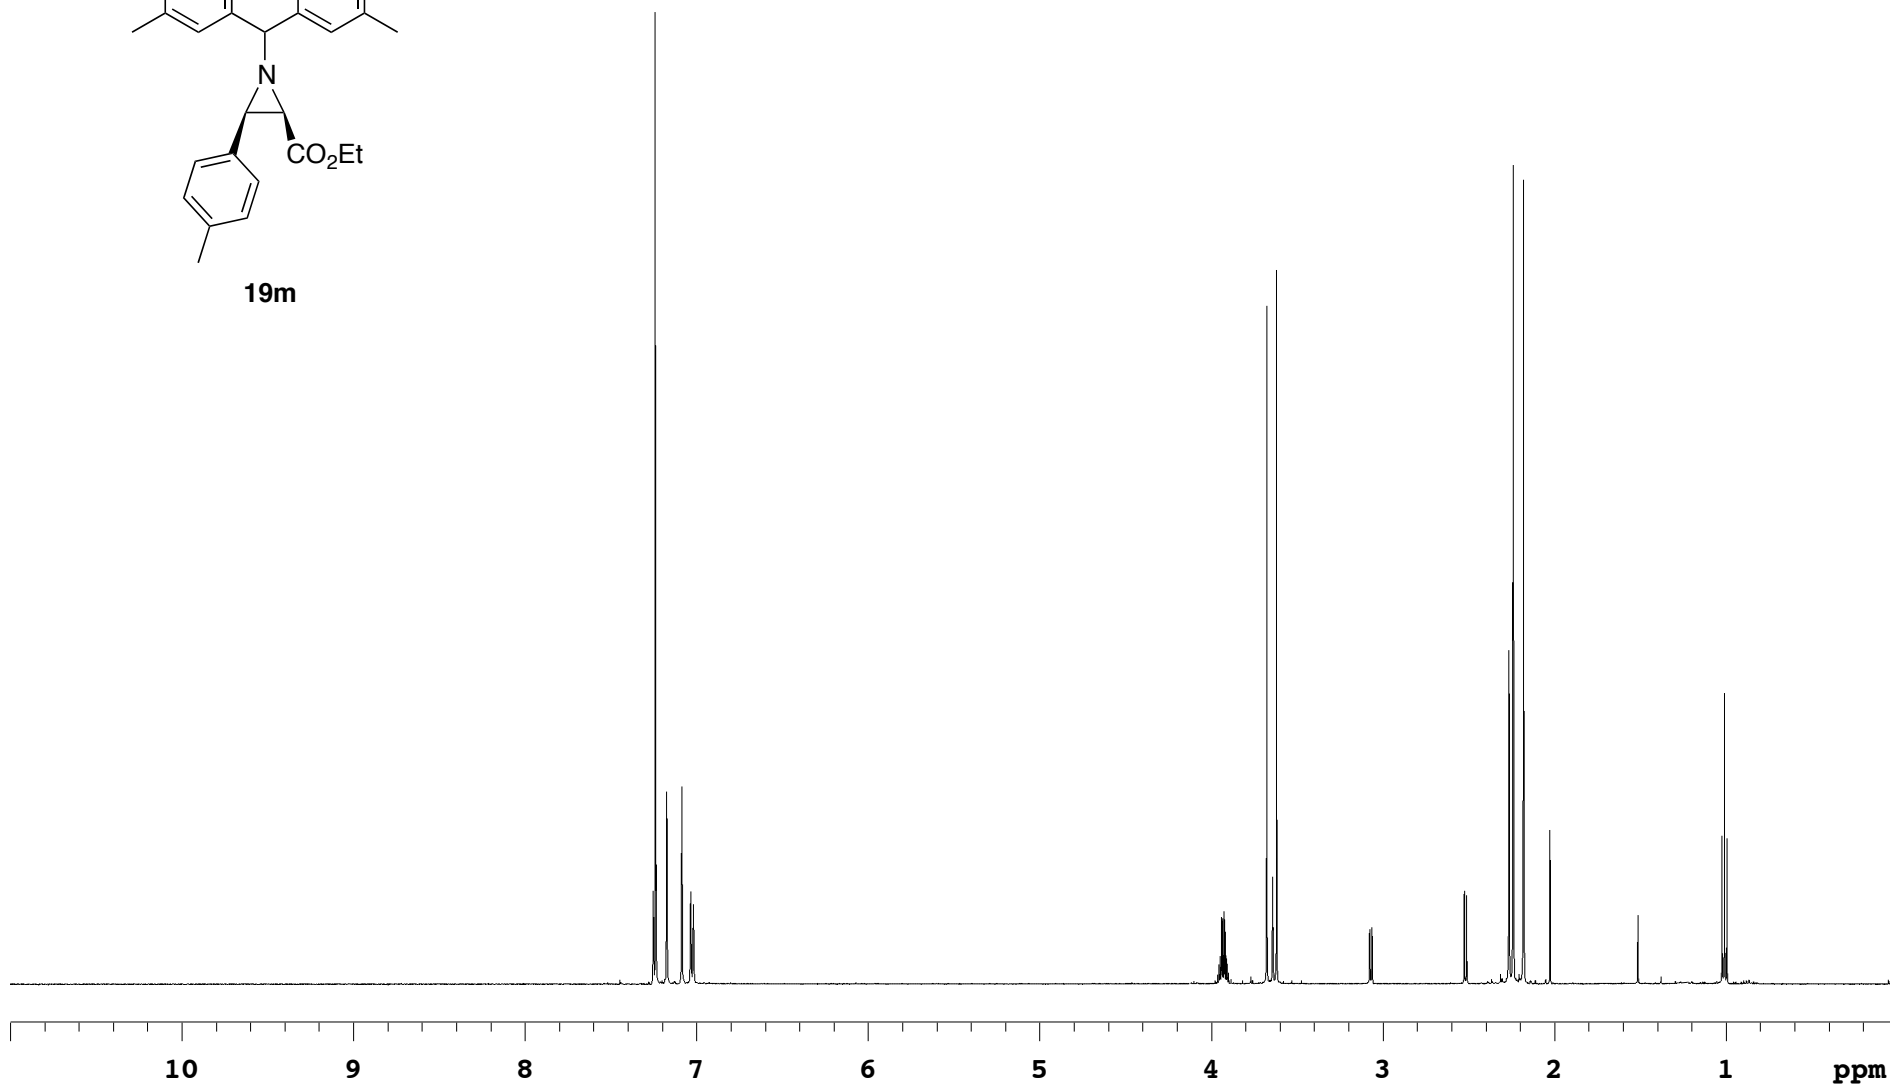

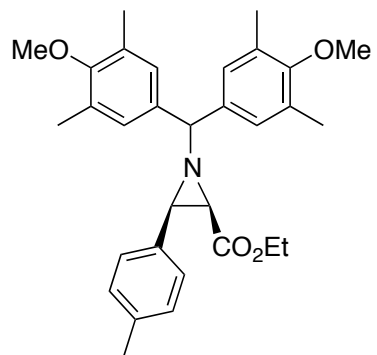

19m

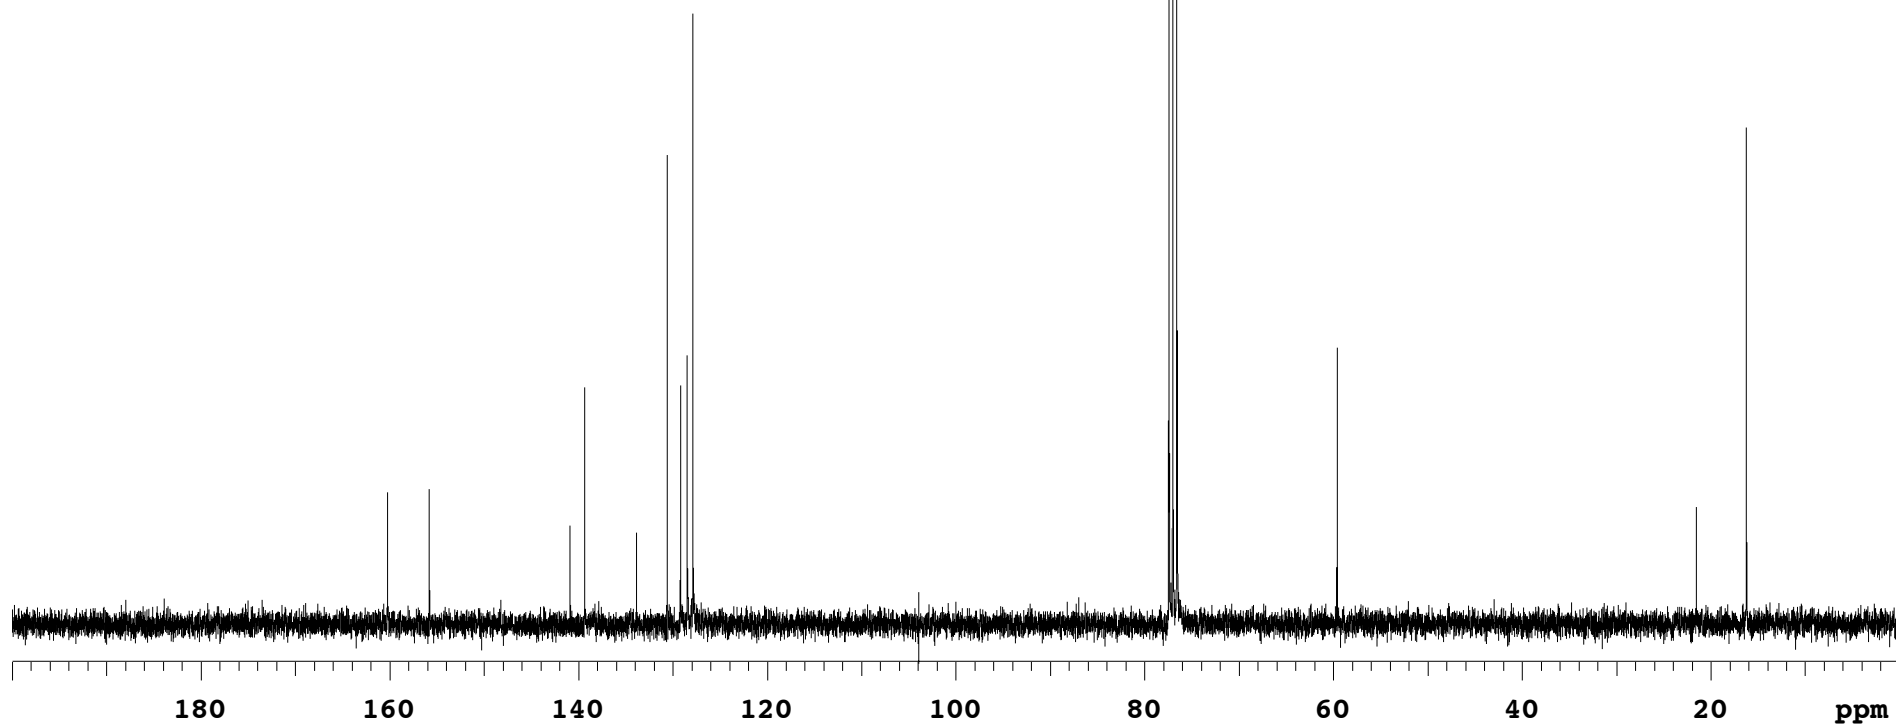

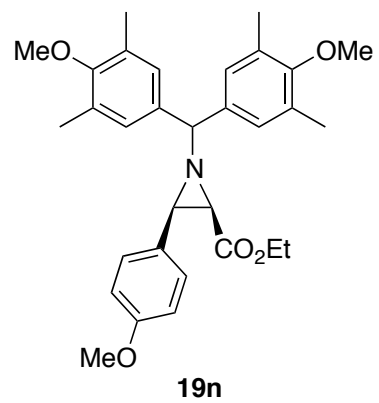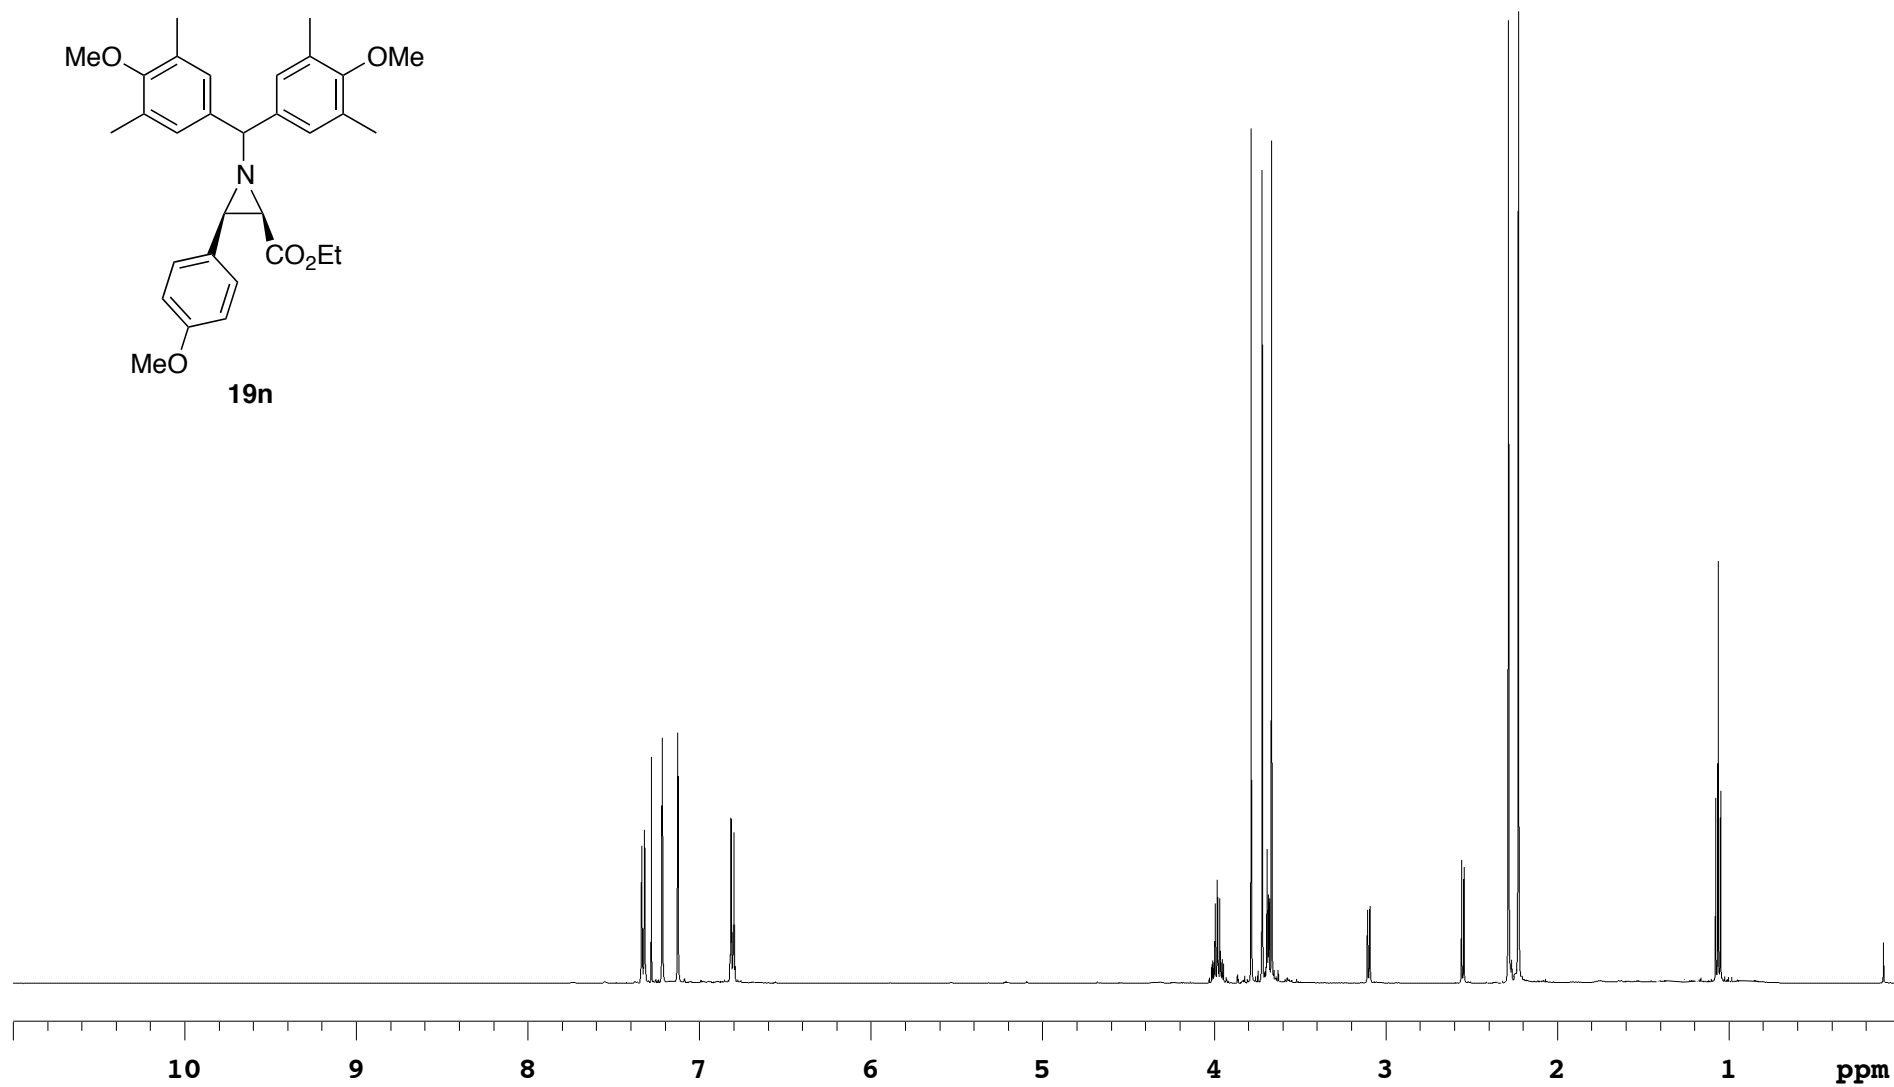

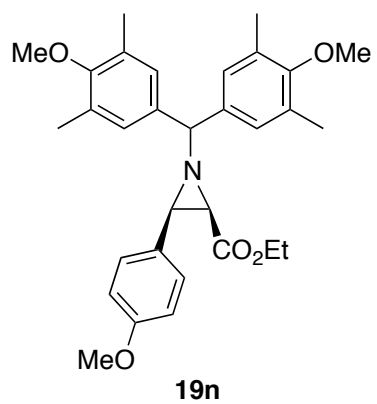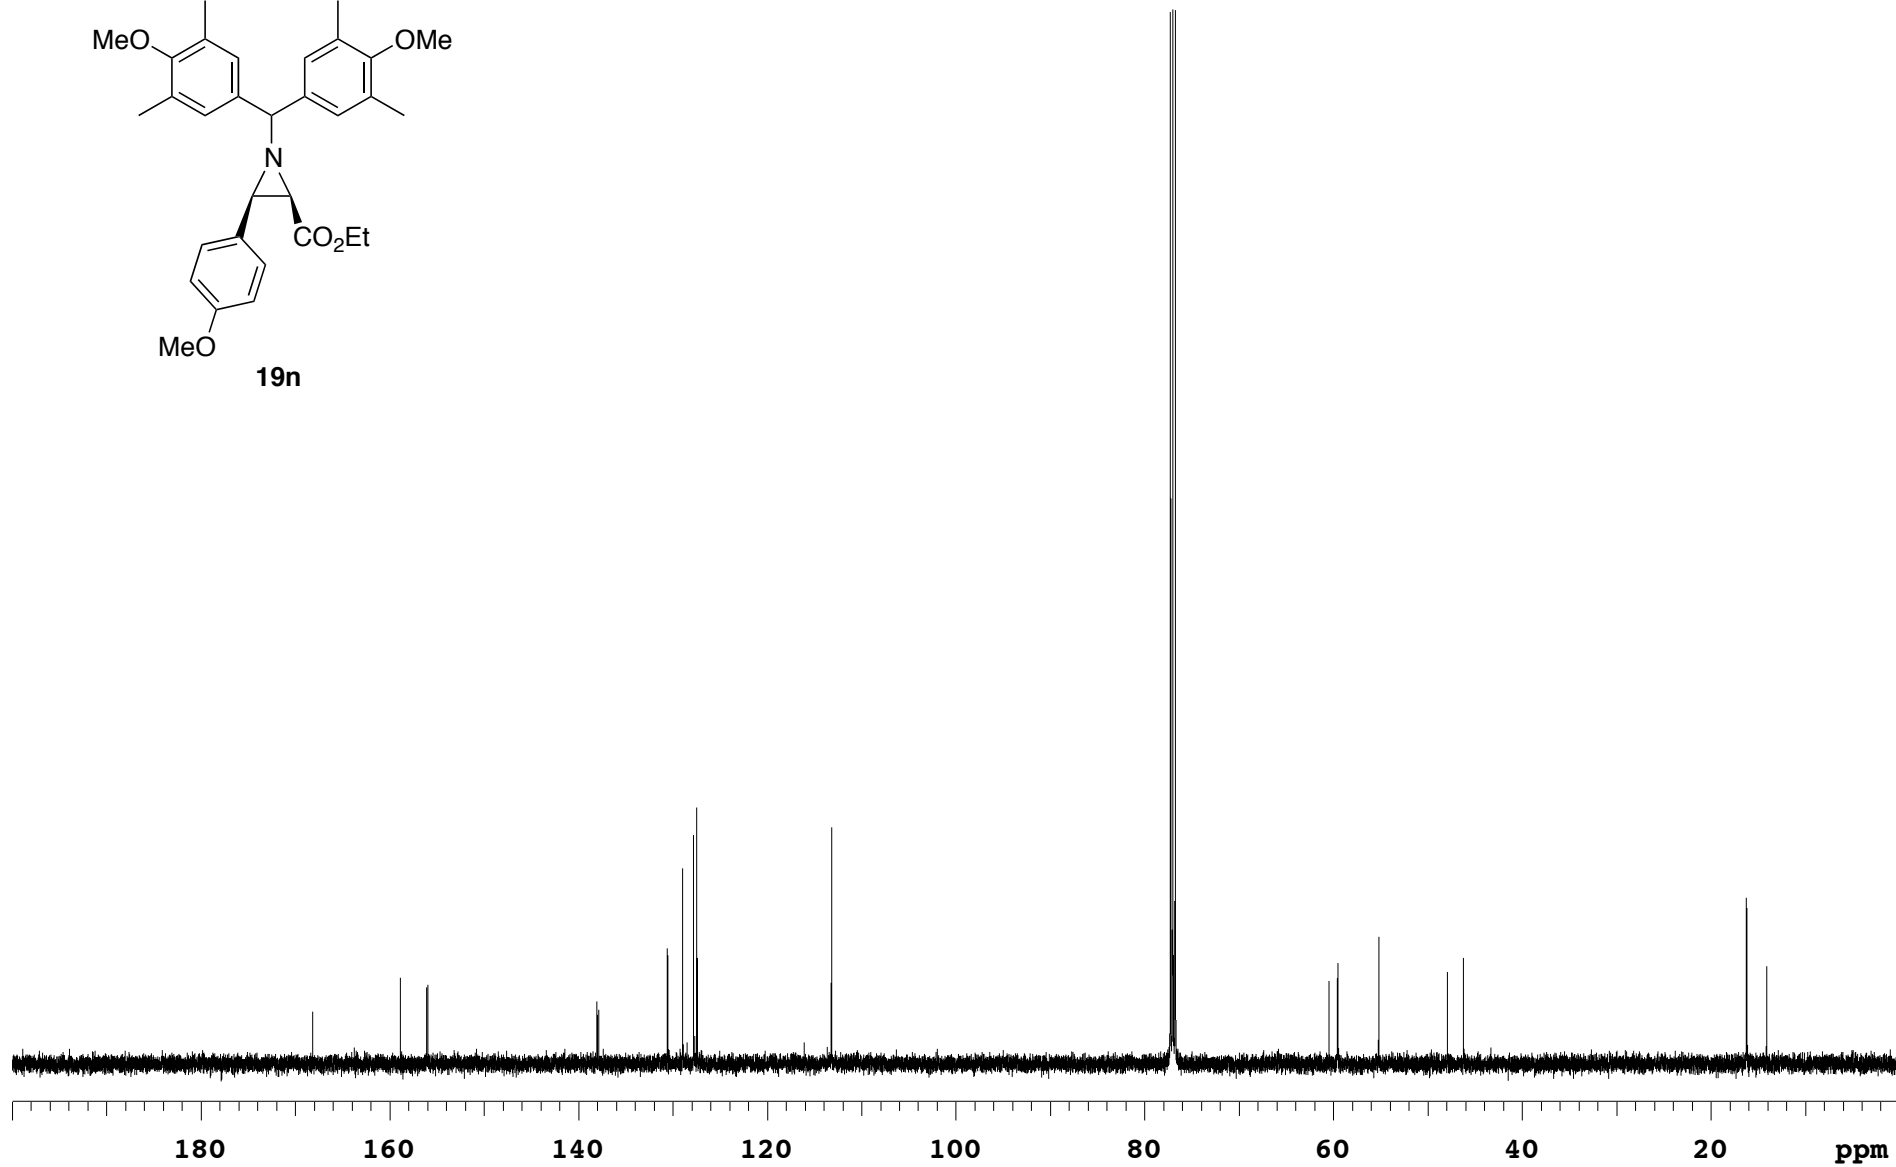

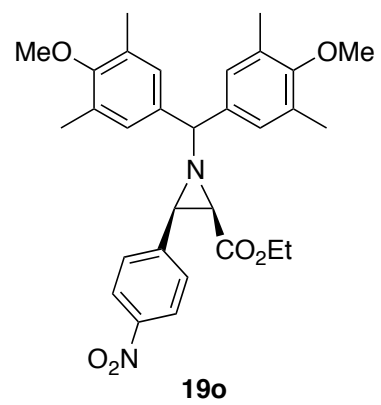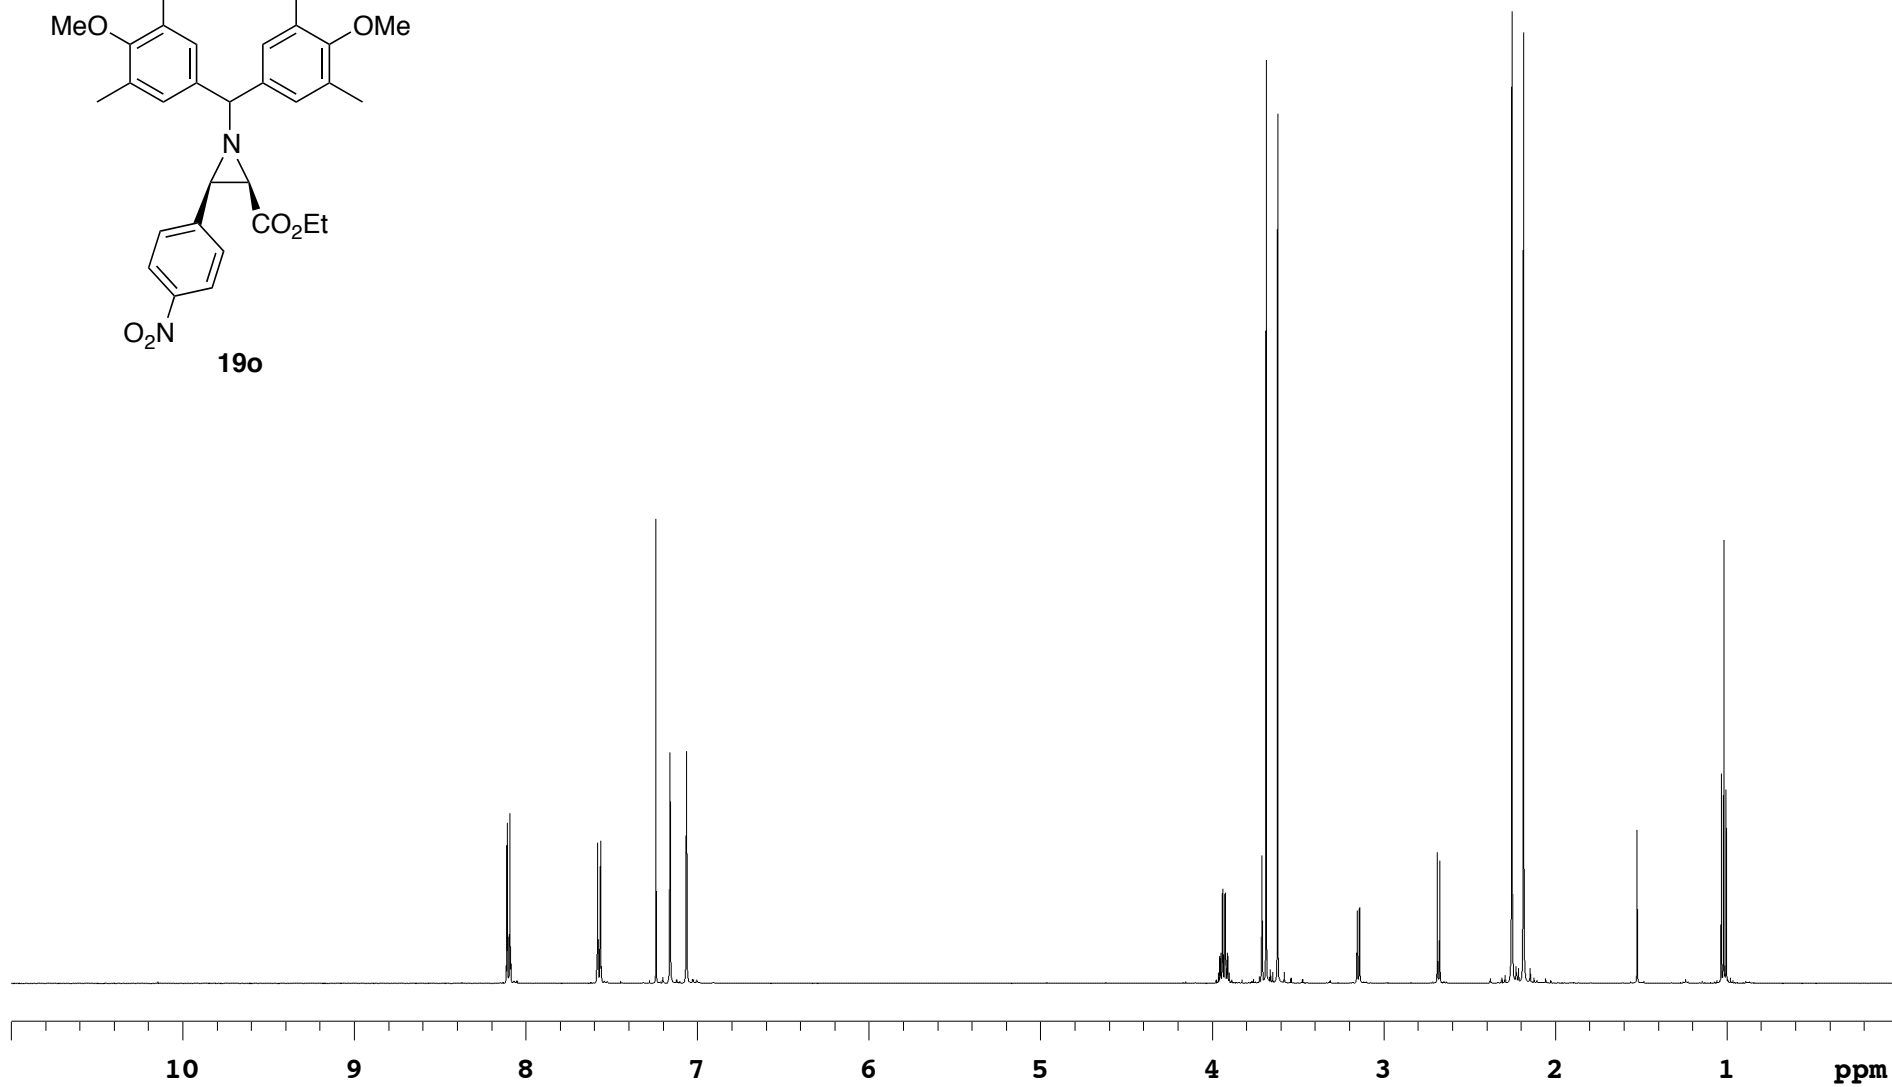



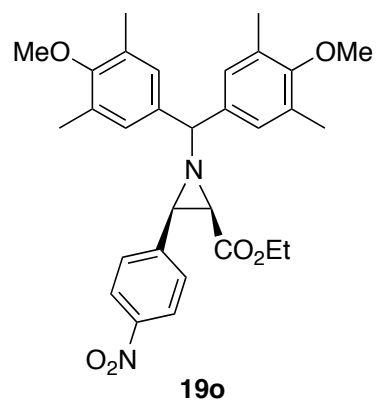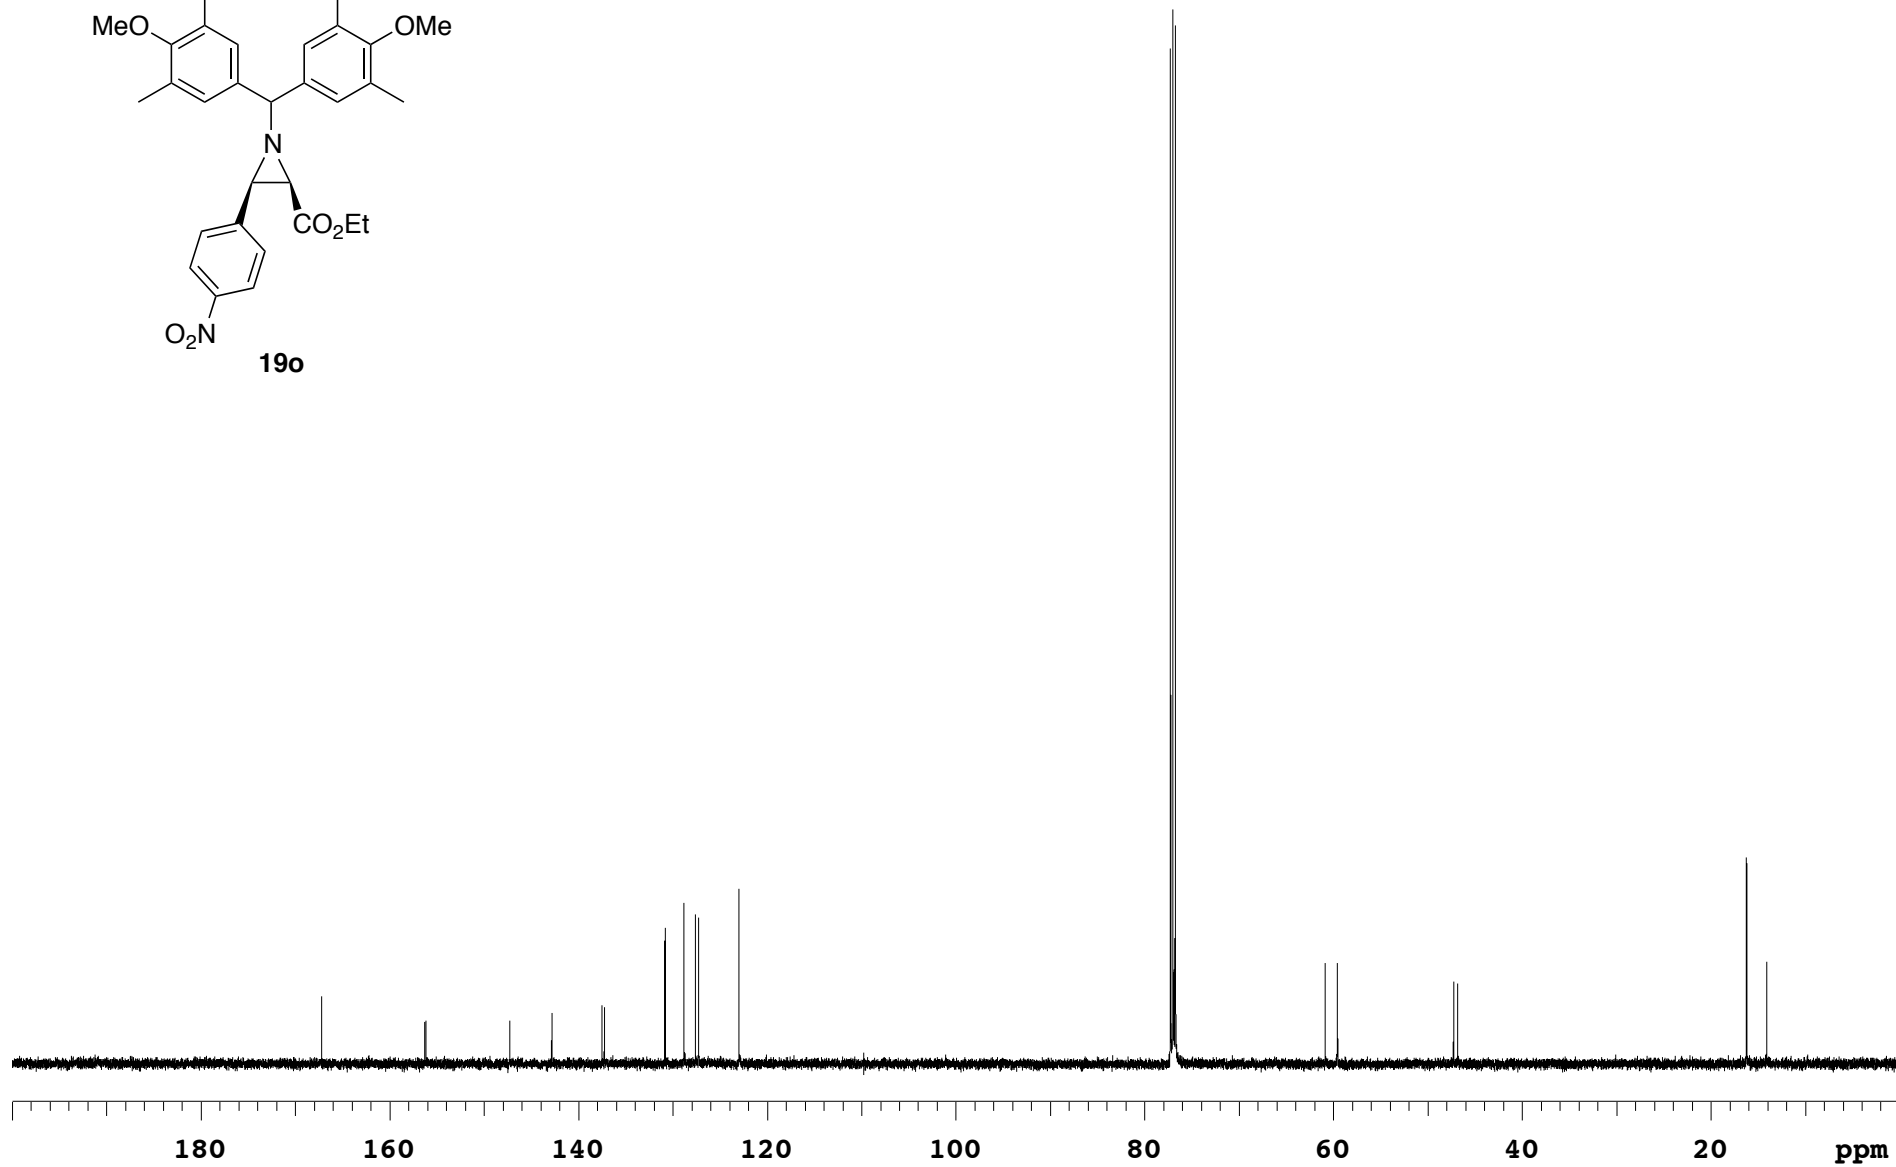

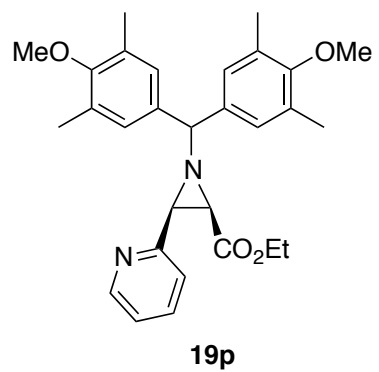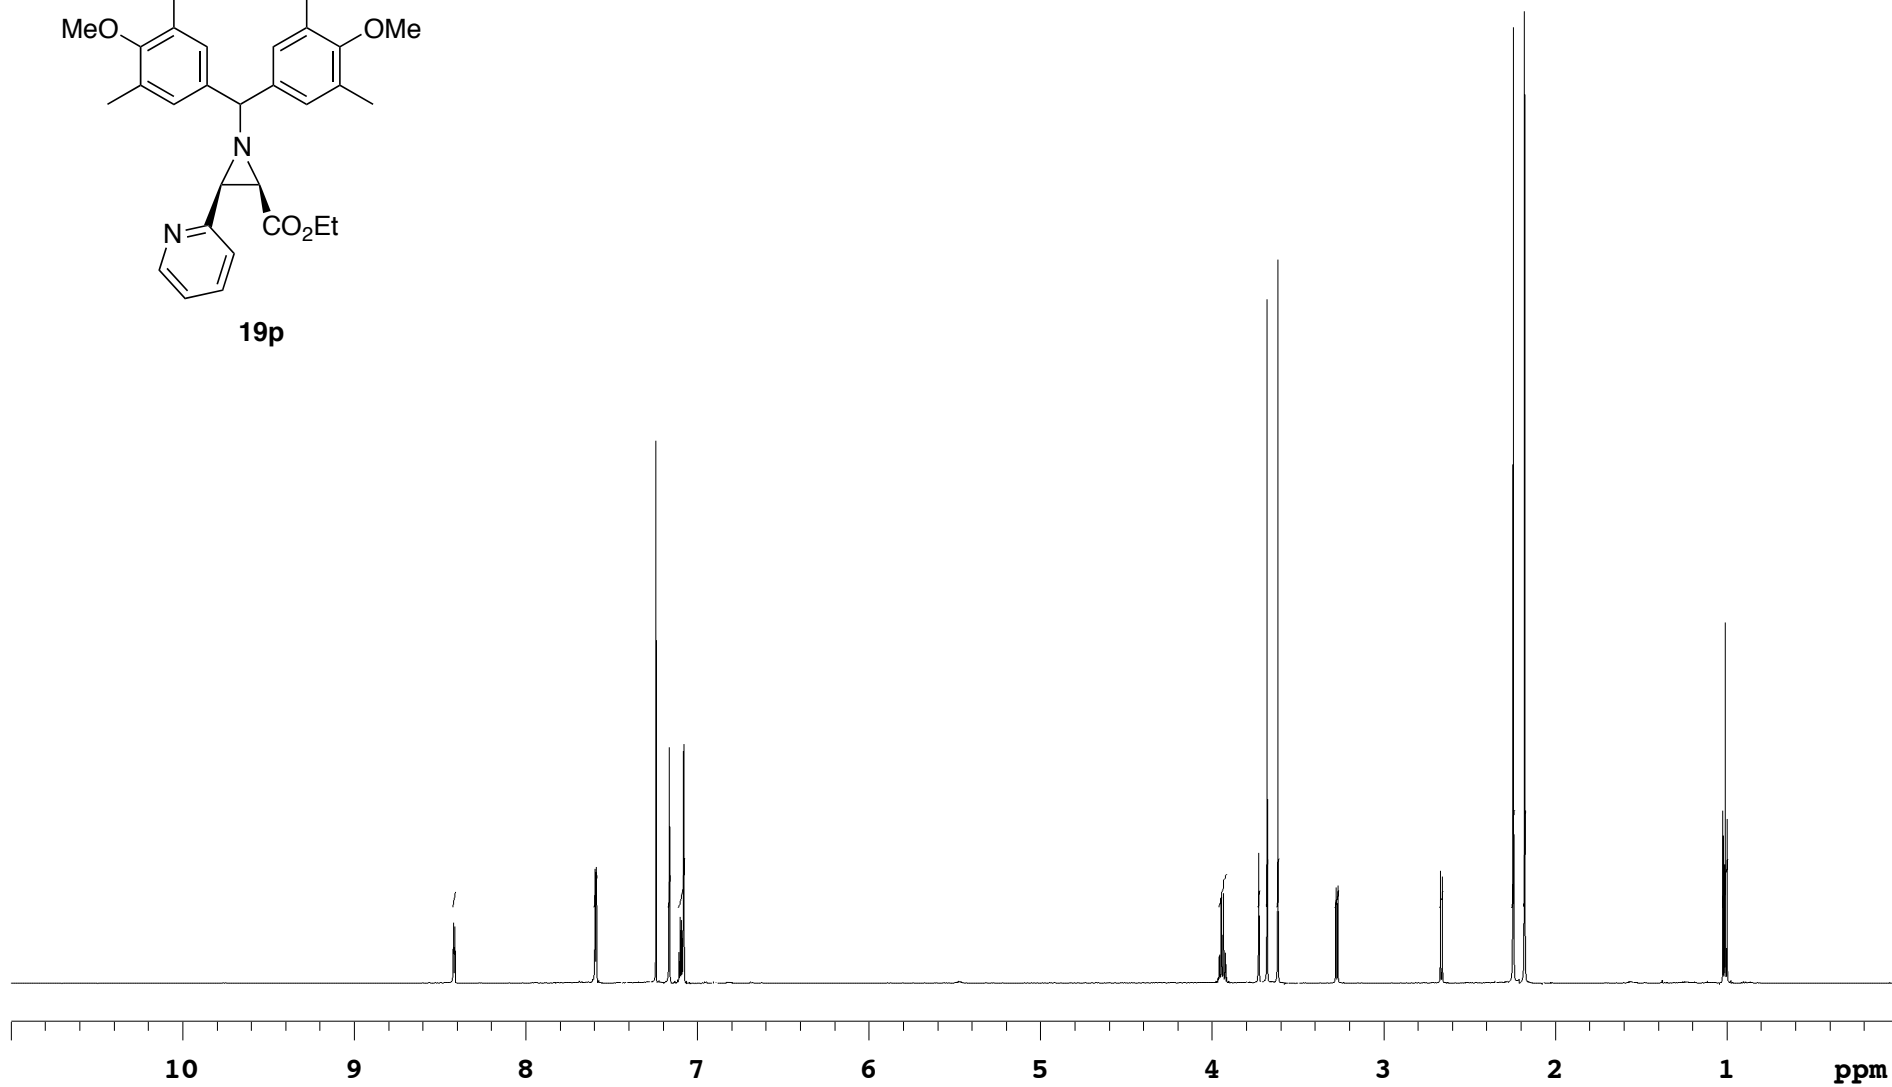

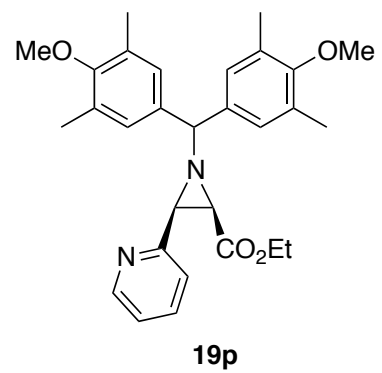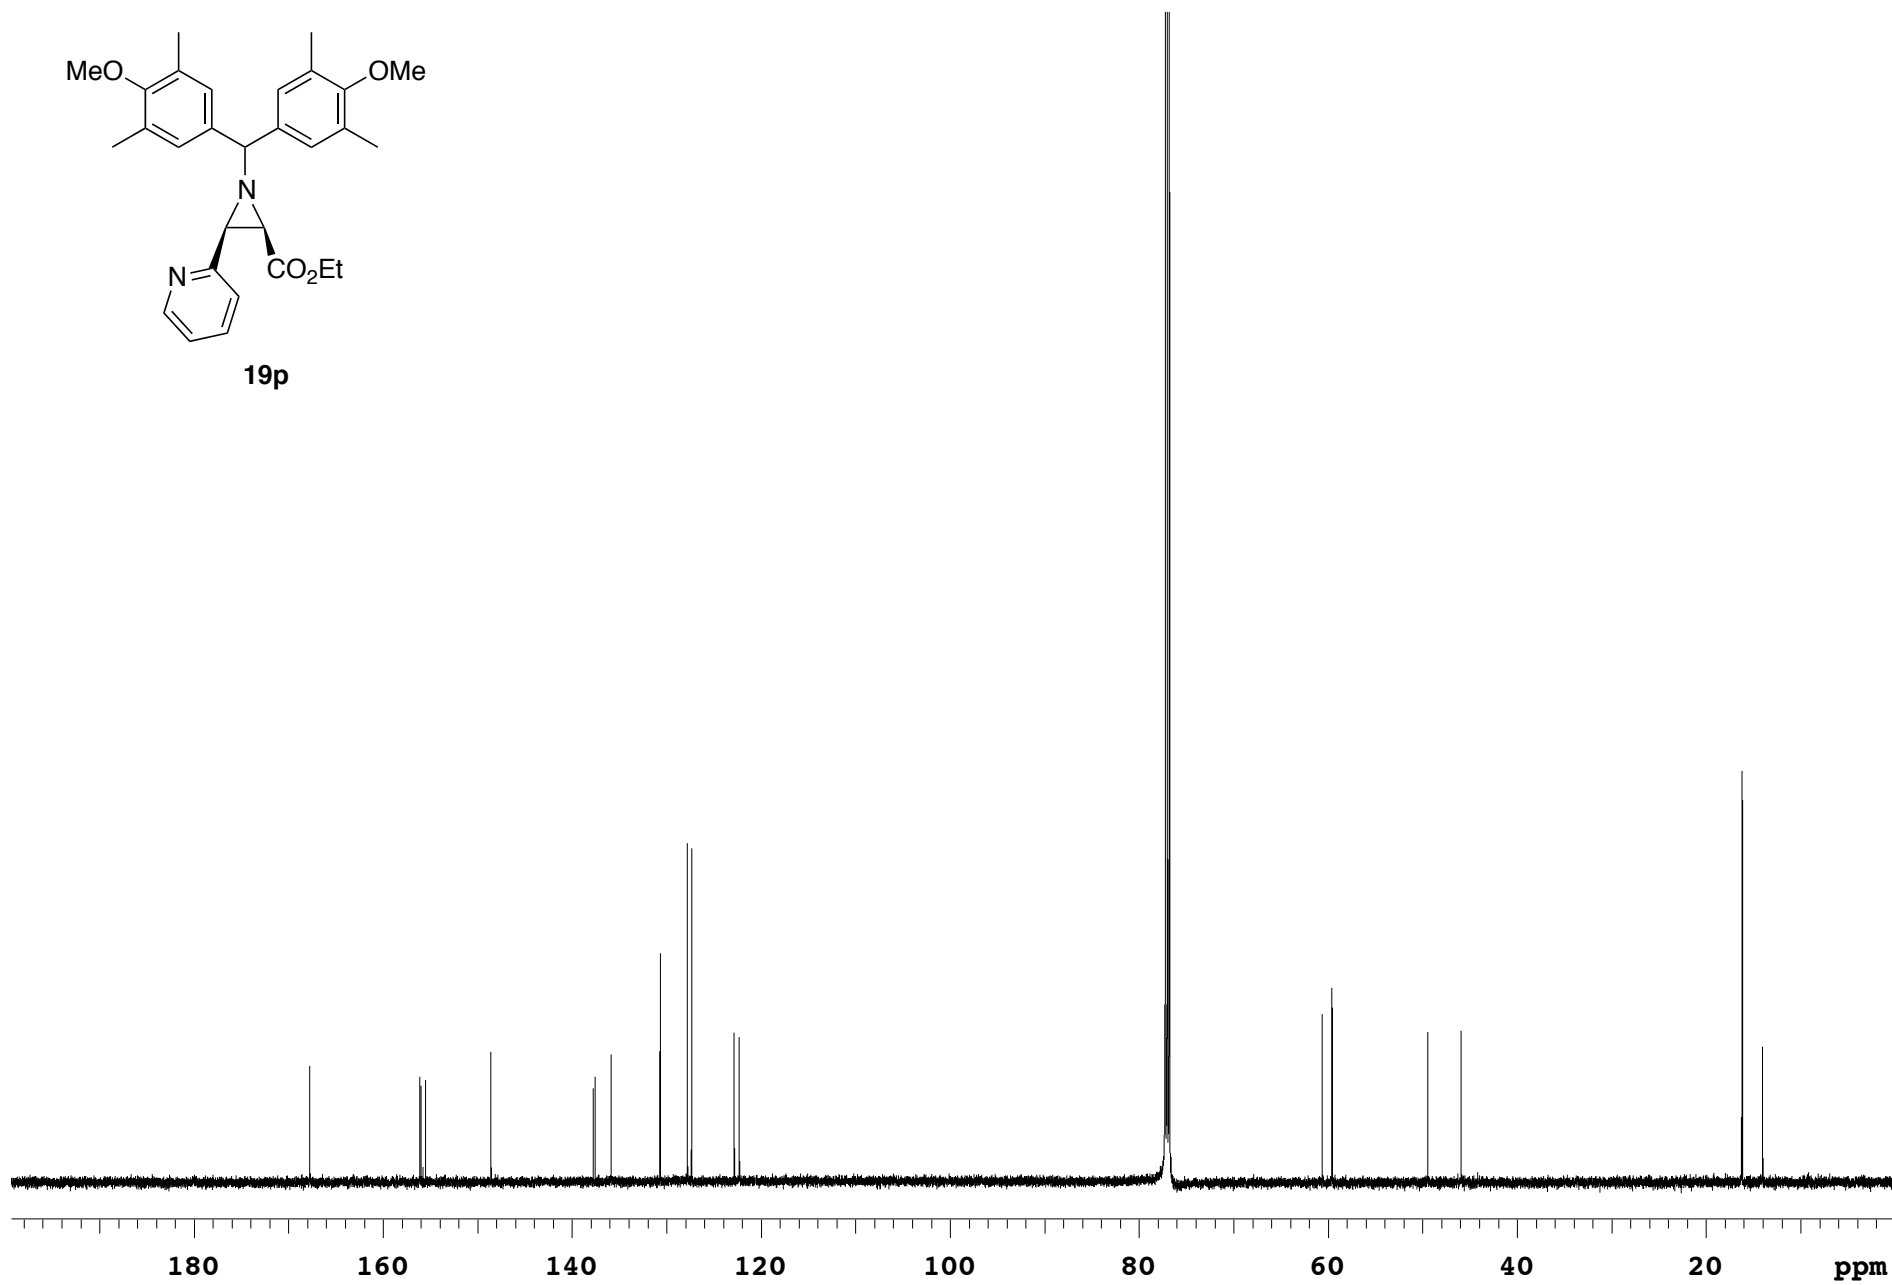

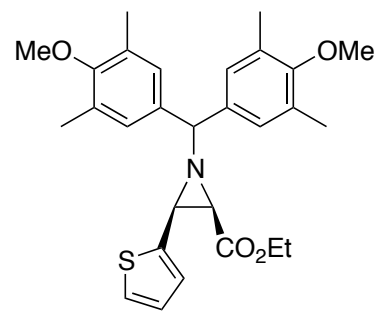

19q

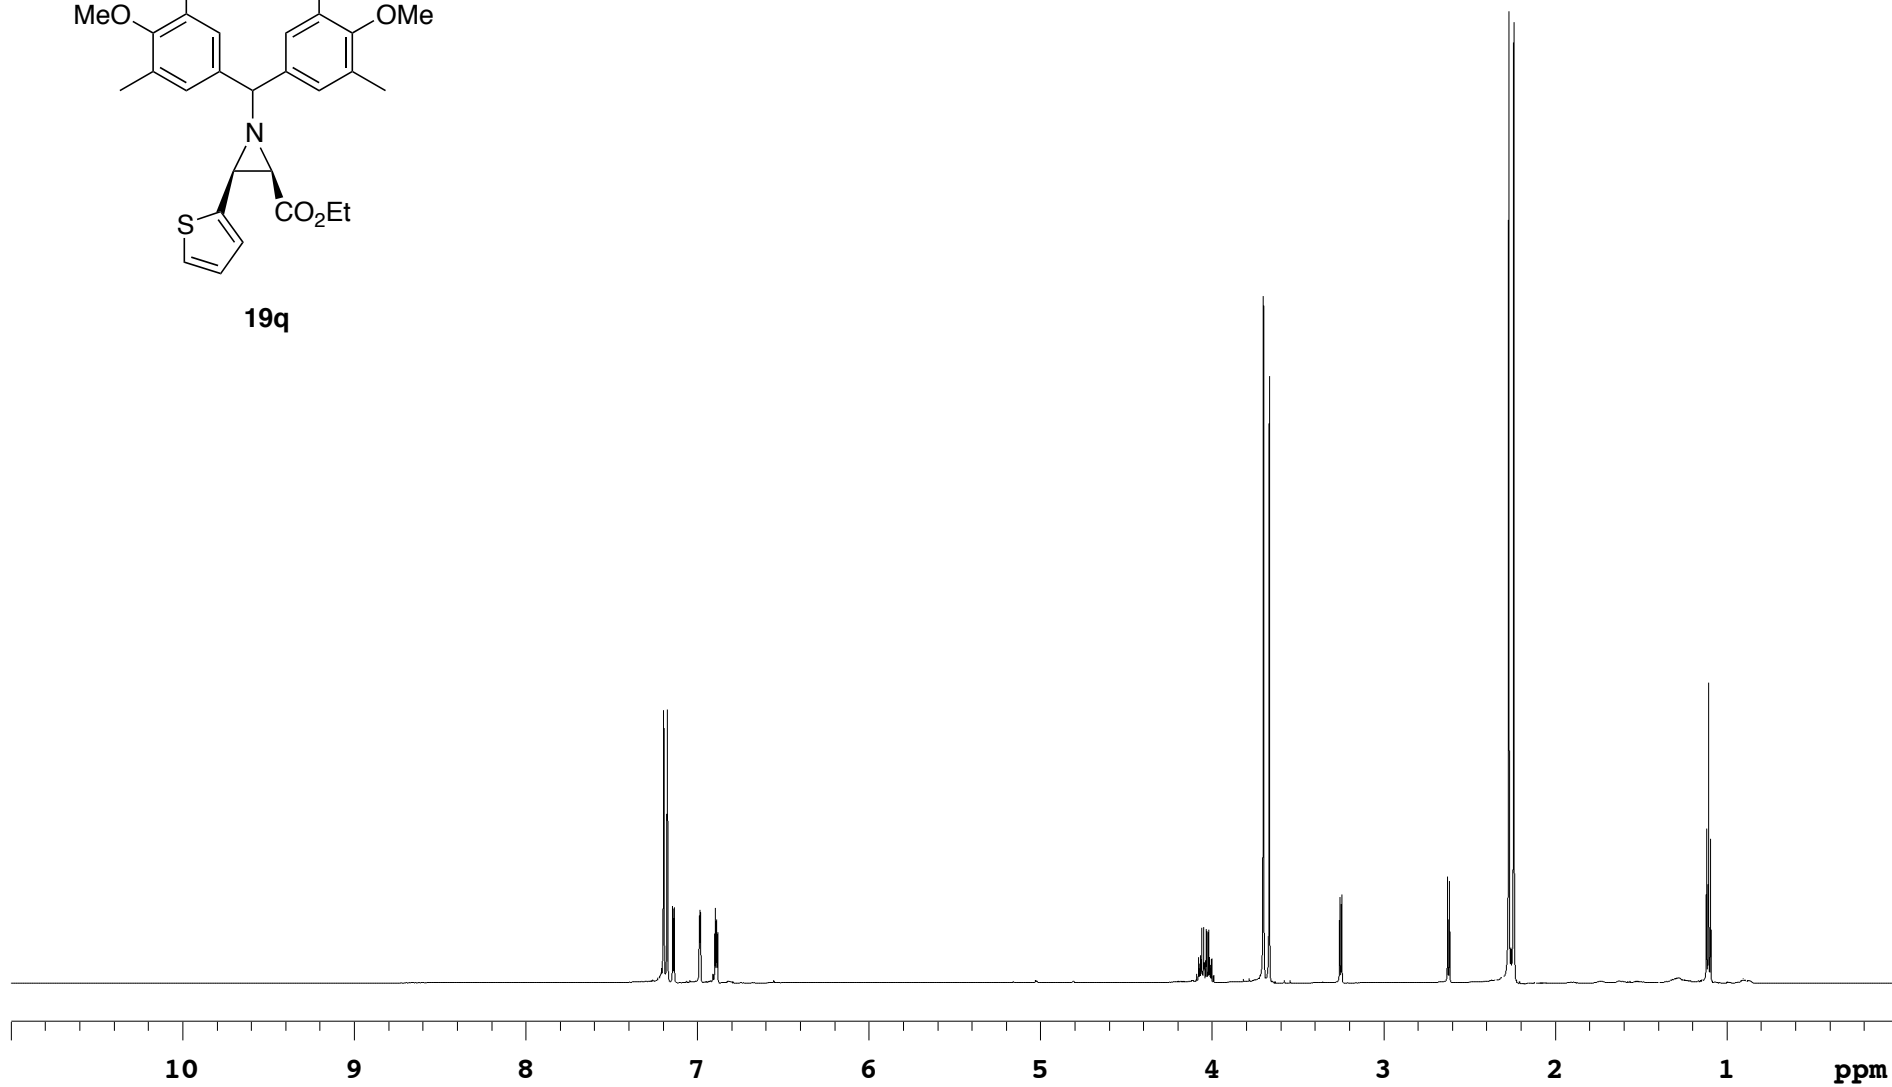

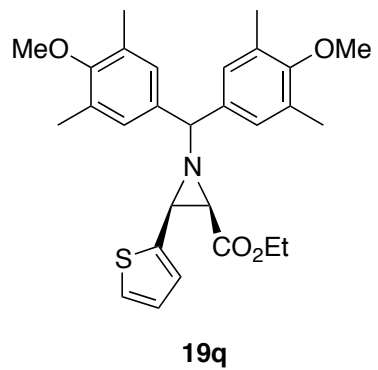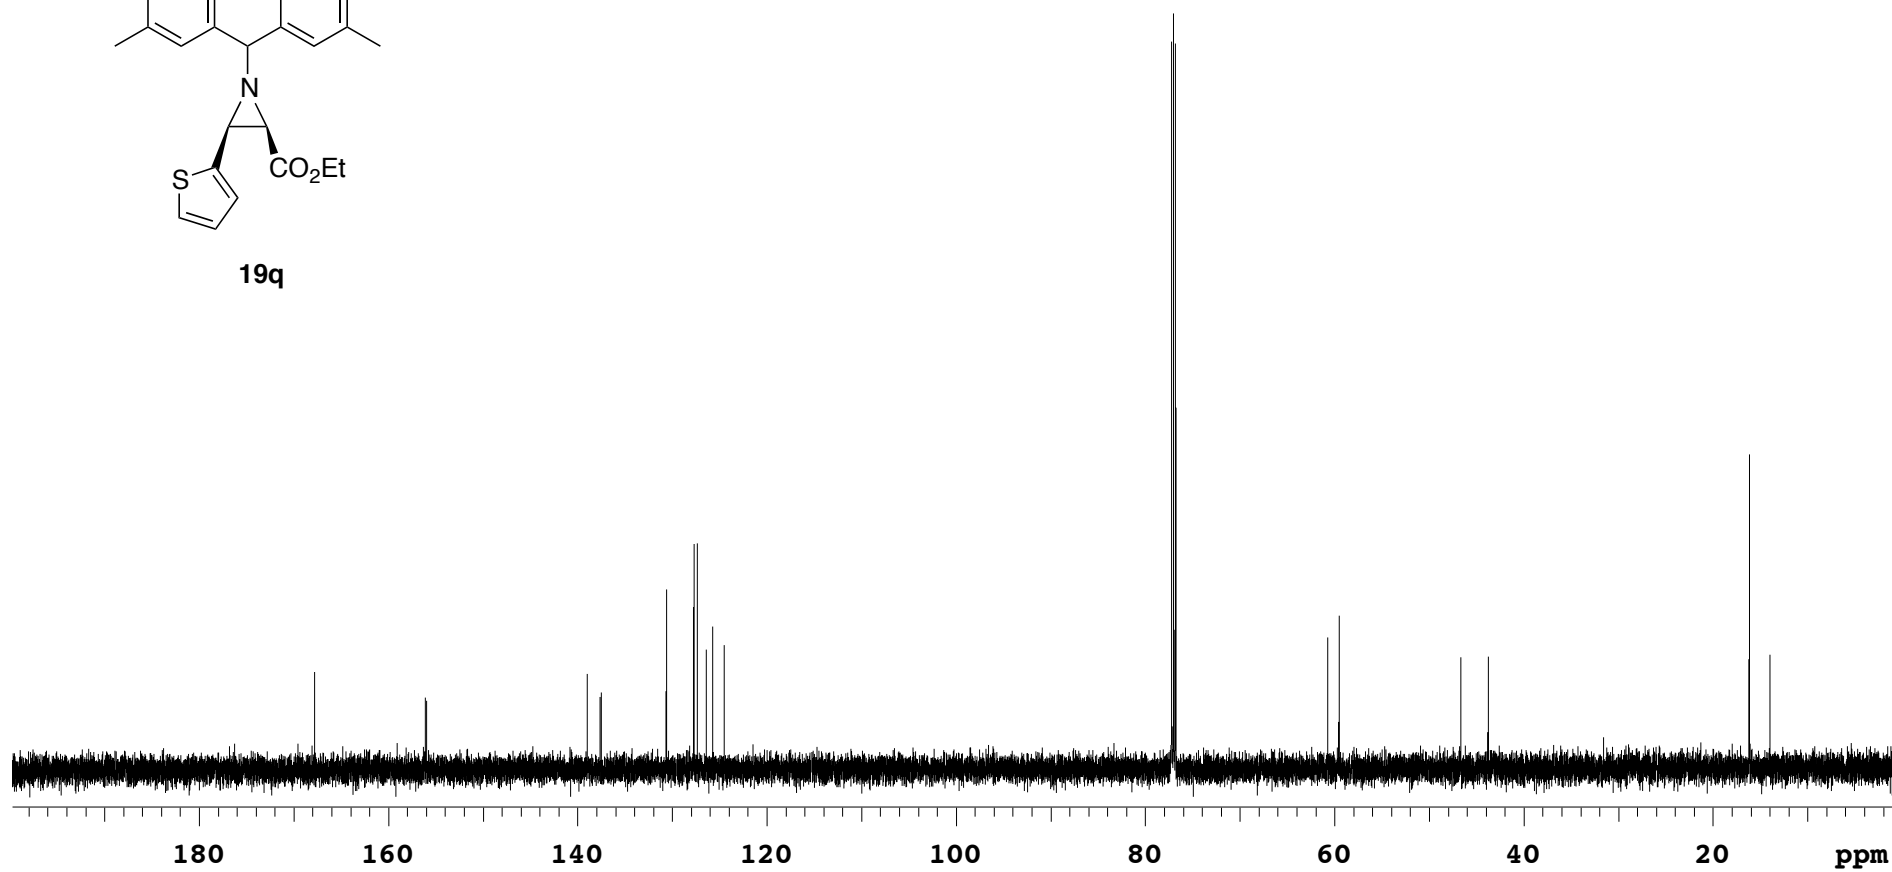

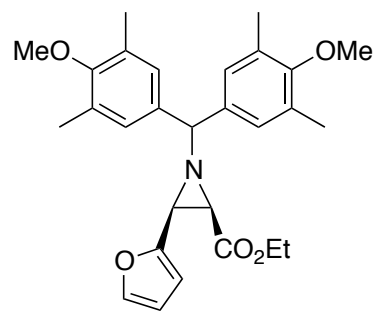

19r

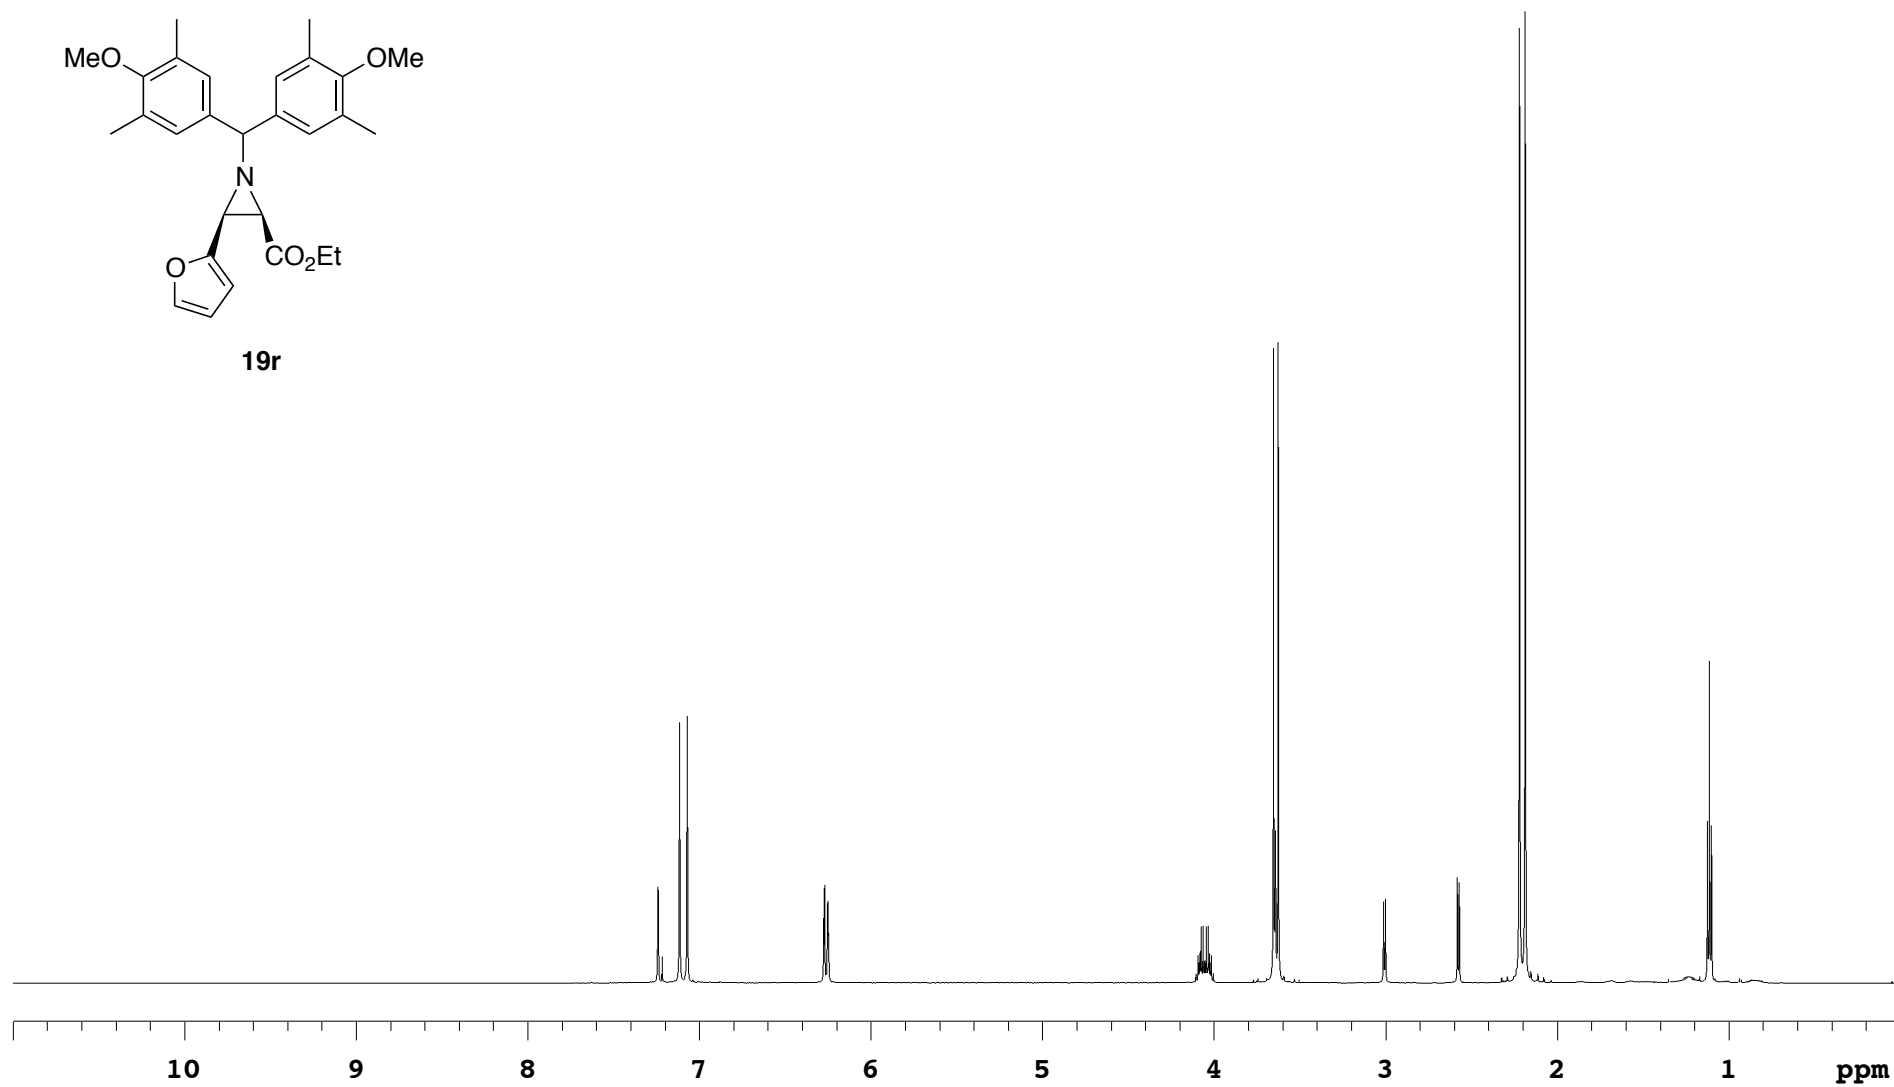

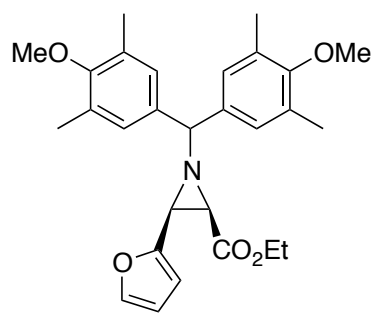

19r

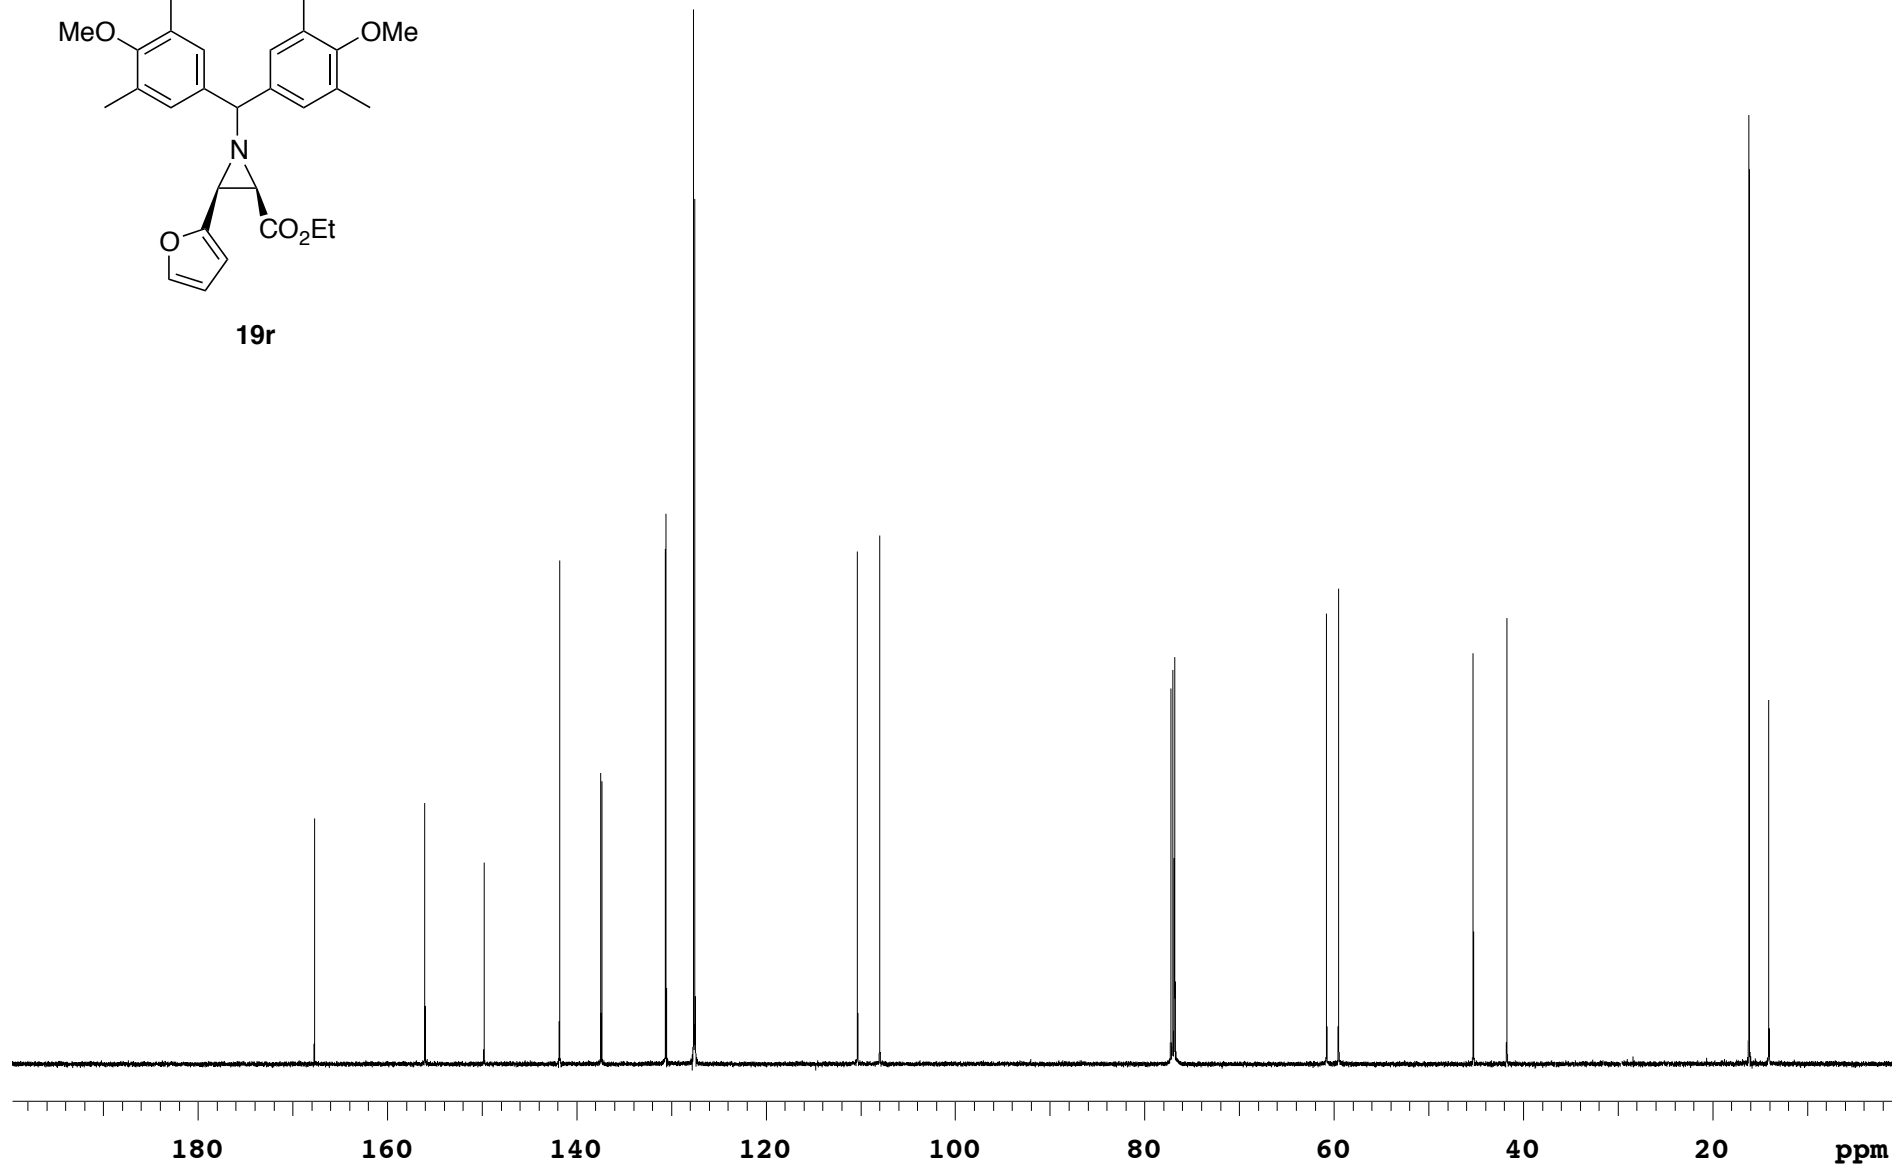

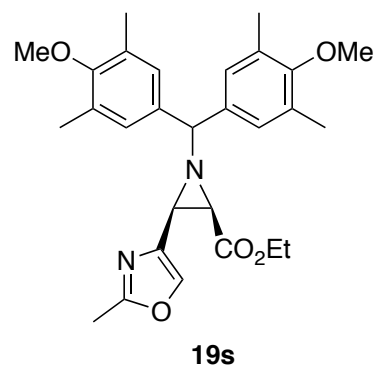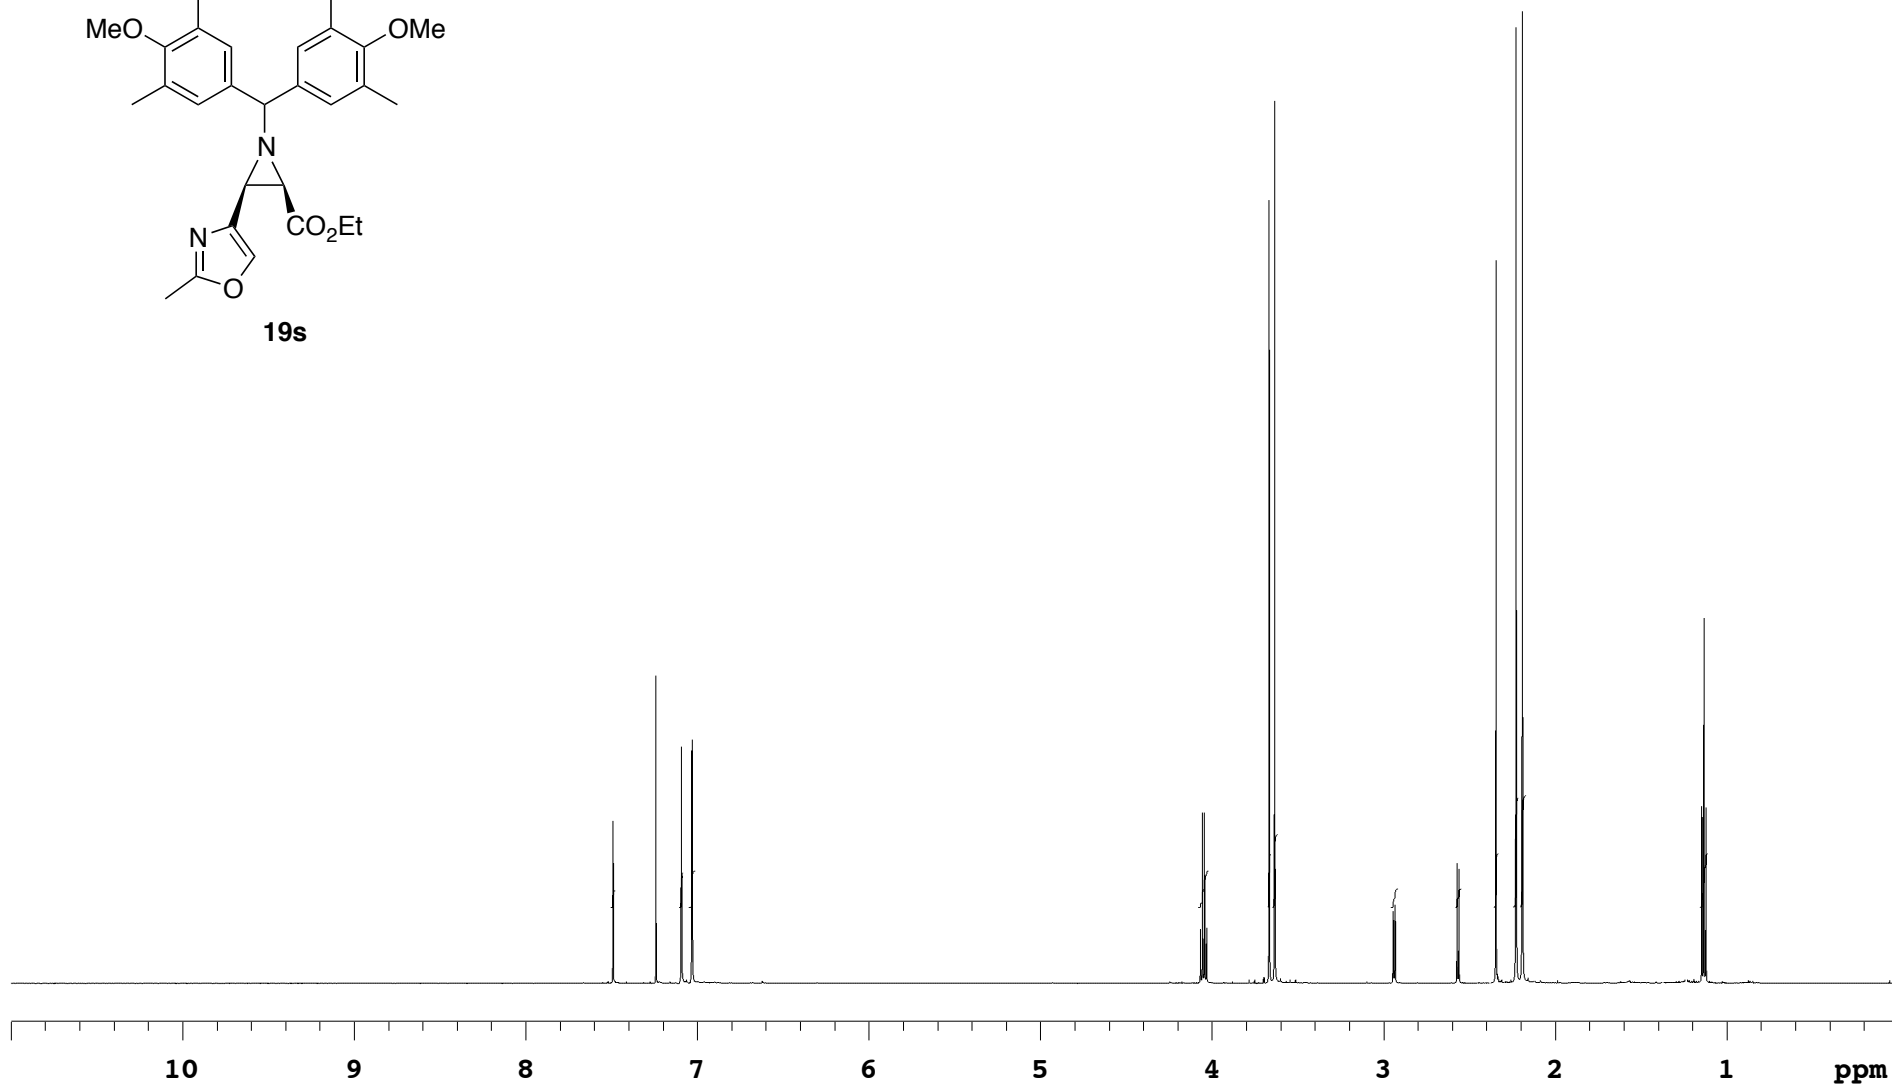



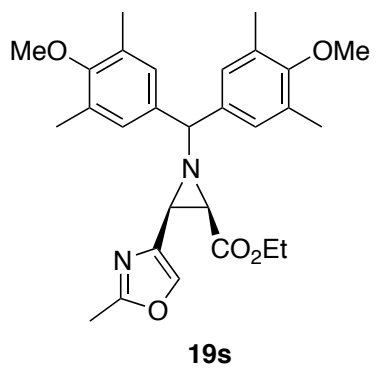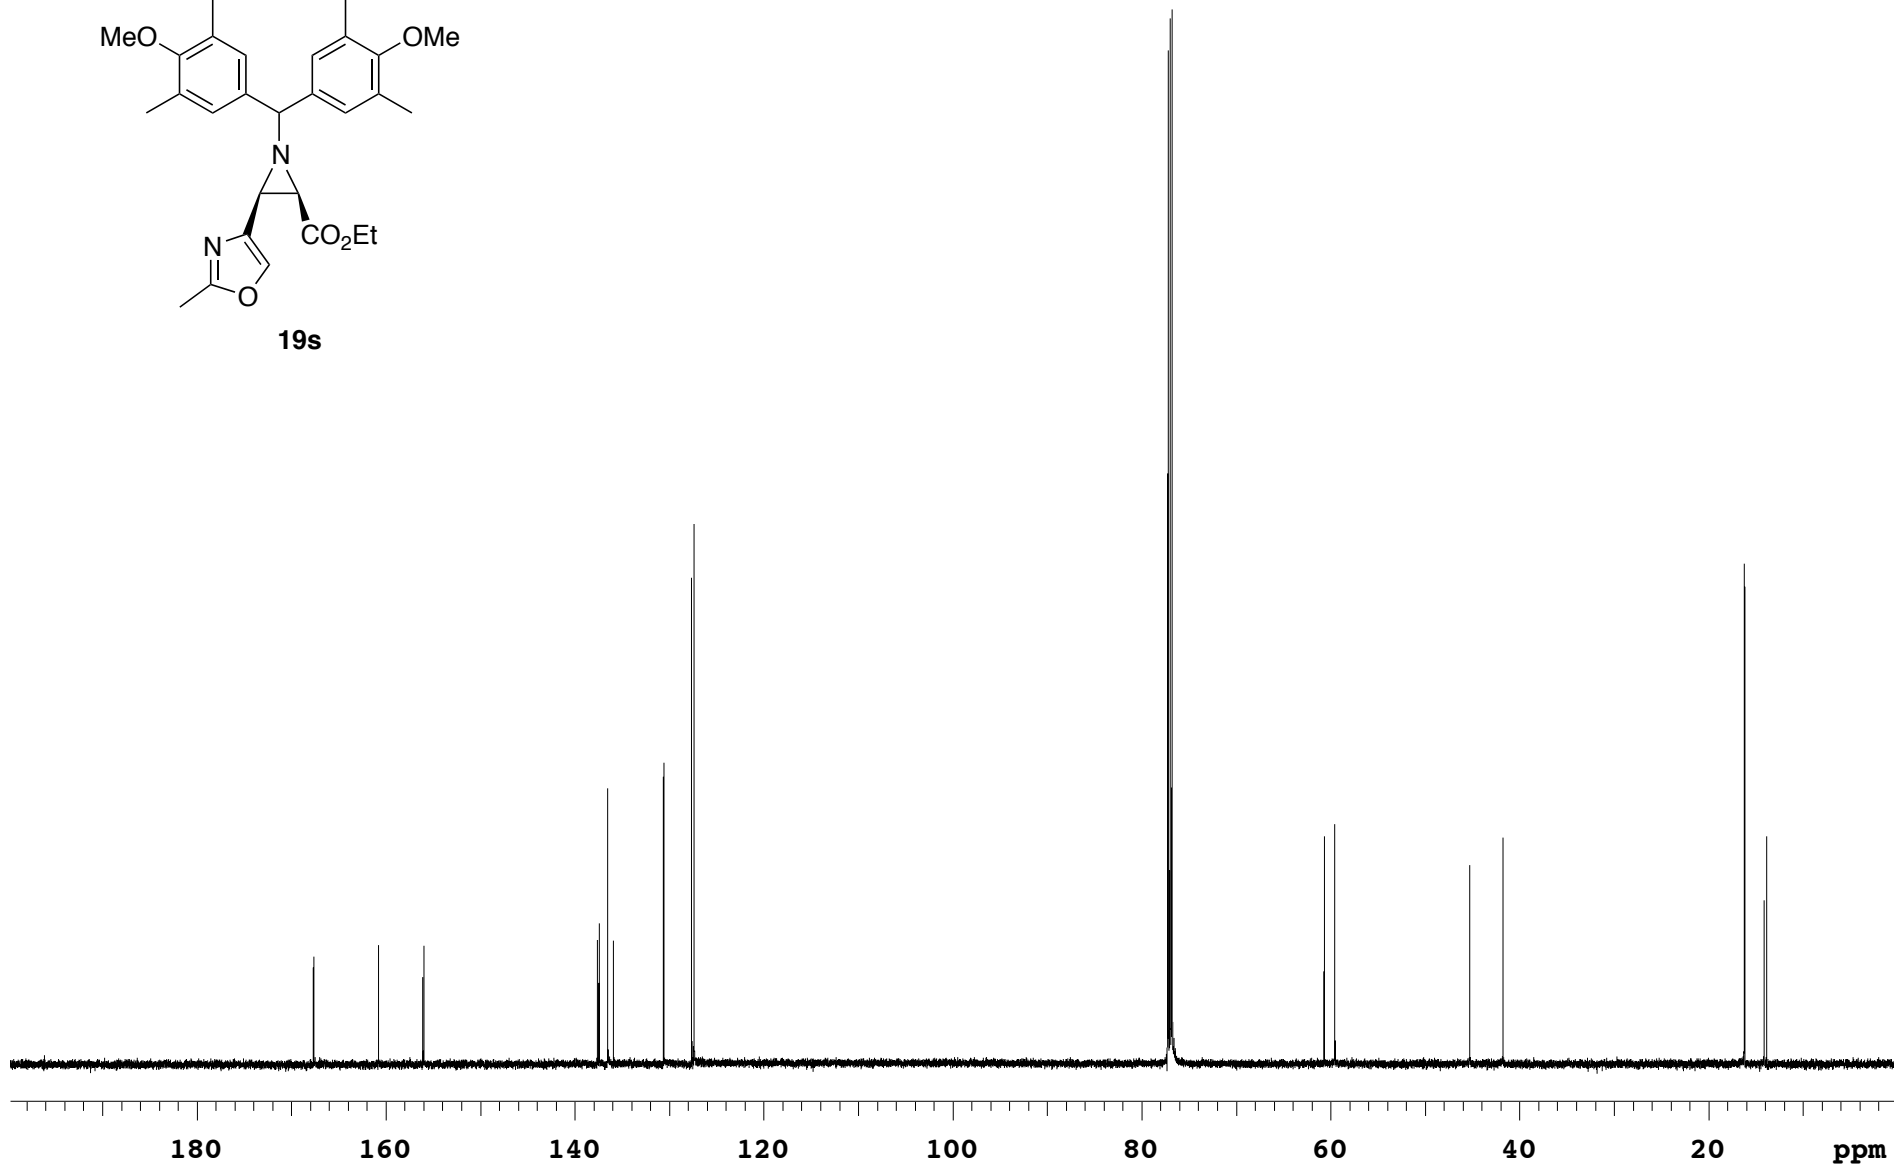

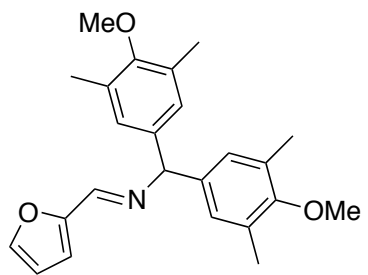

13r

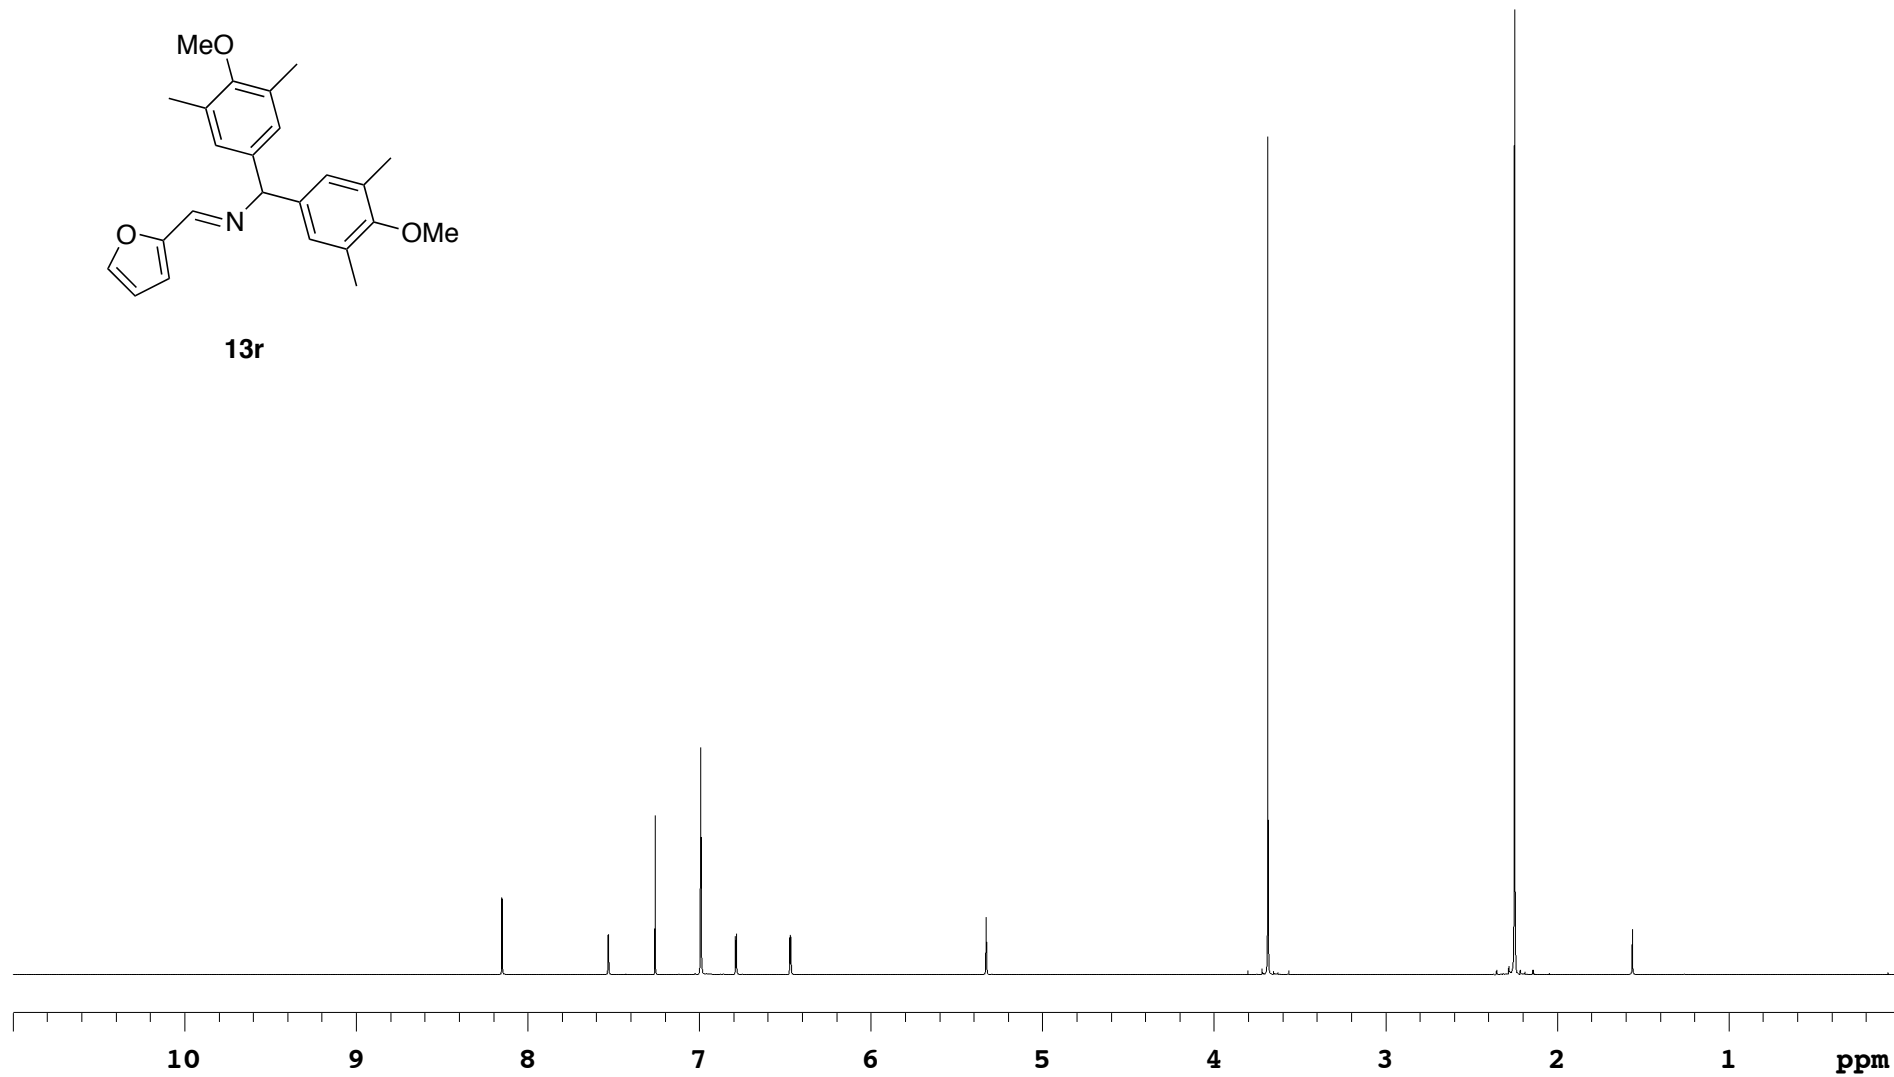



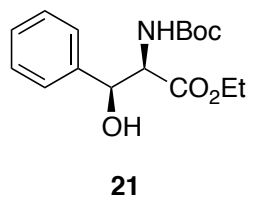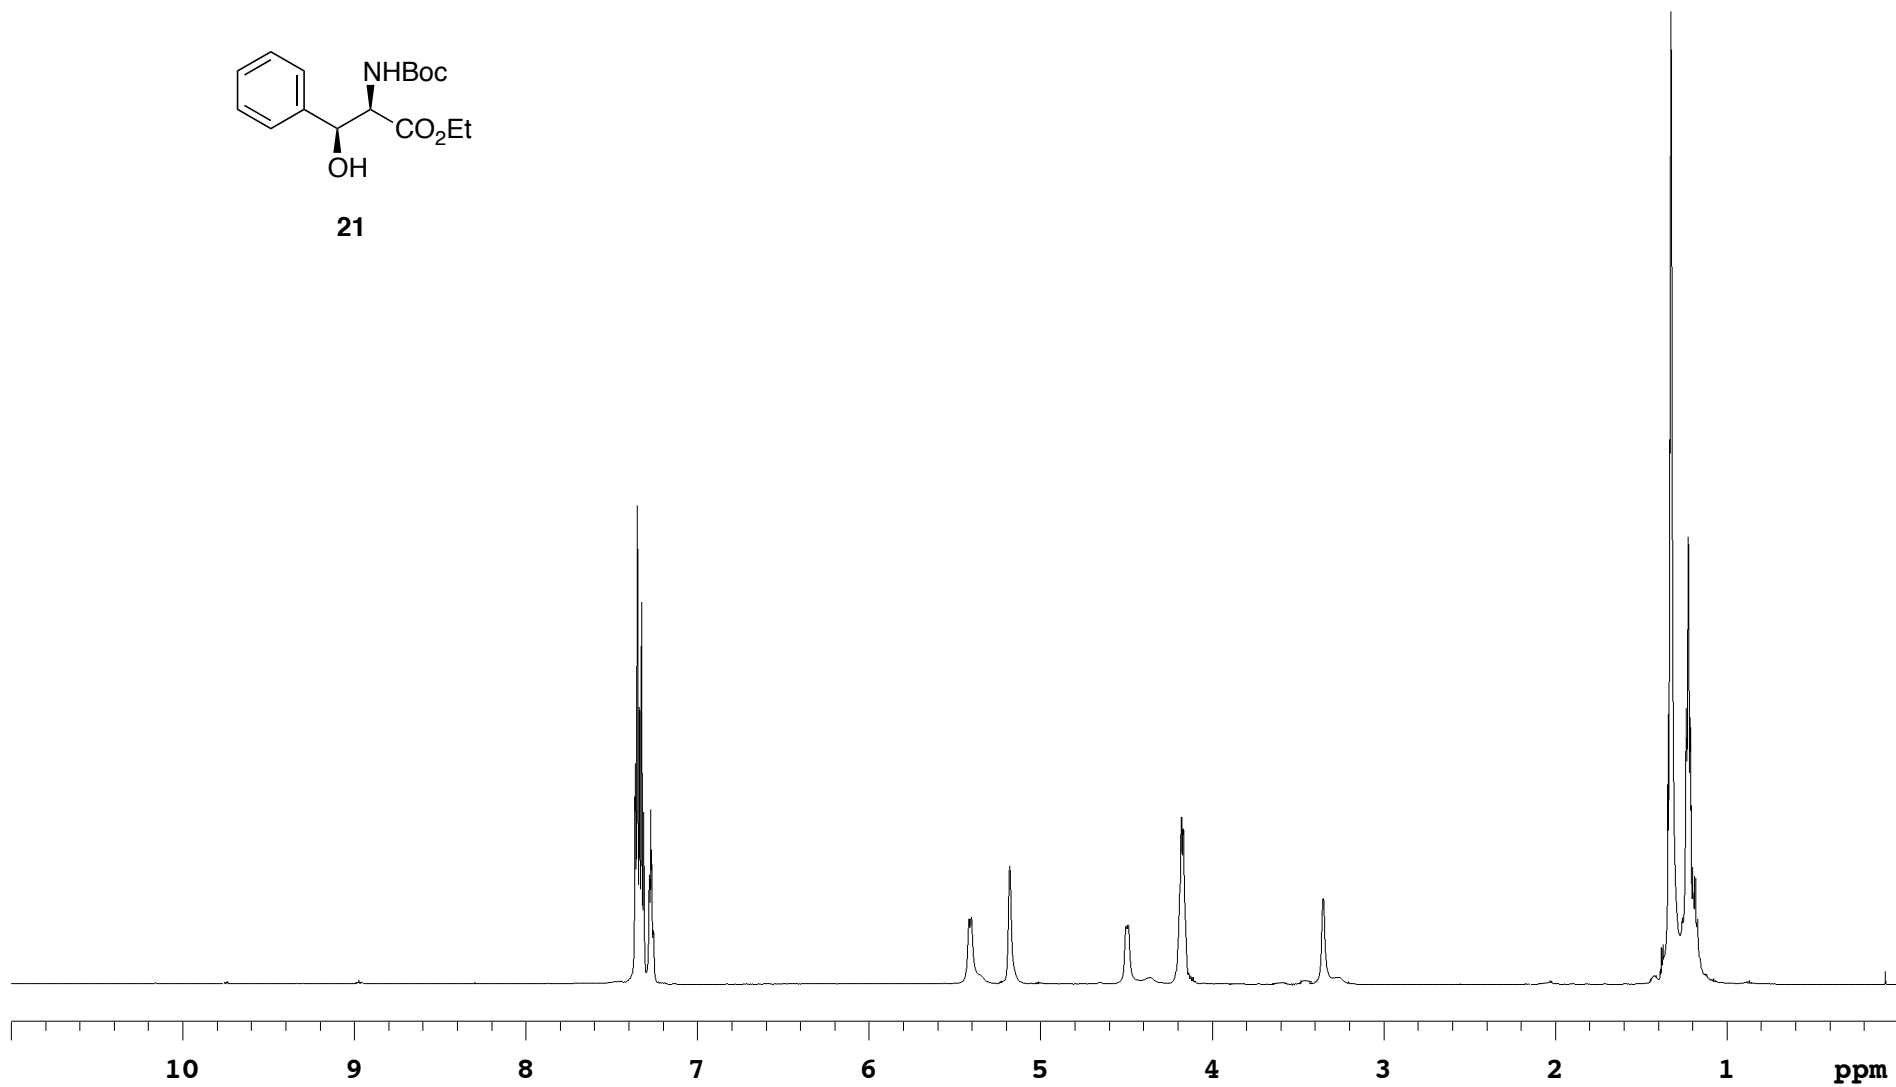

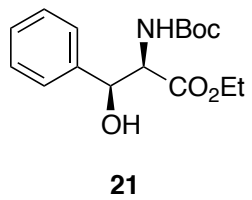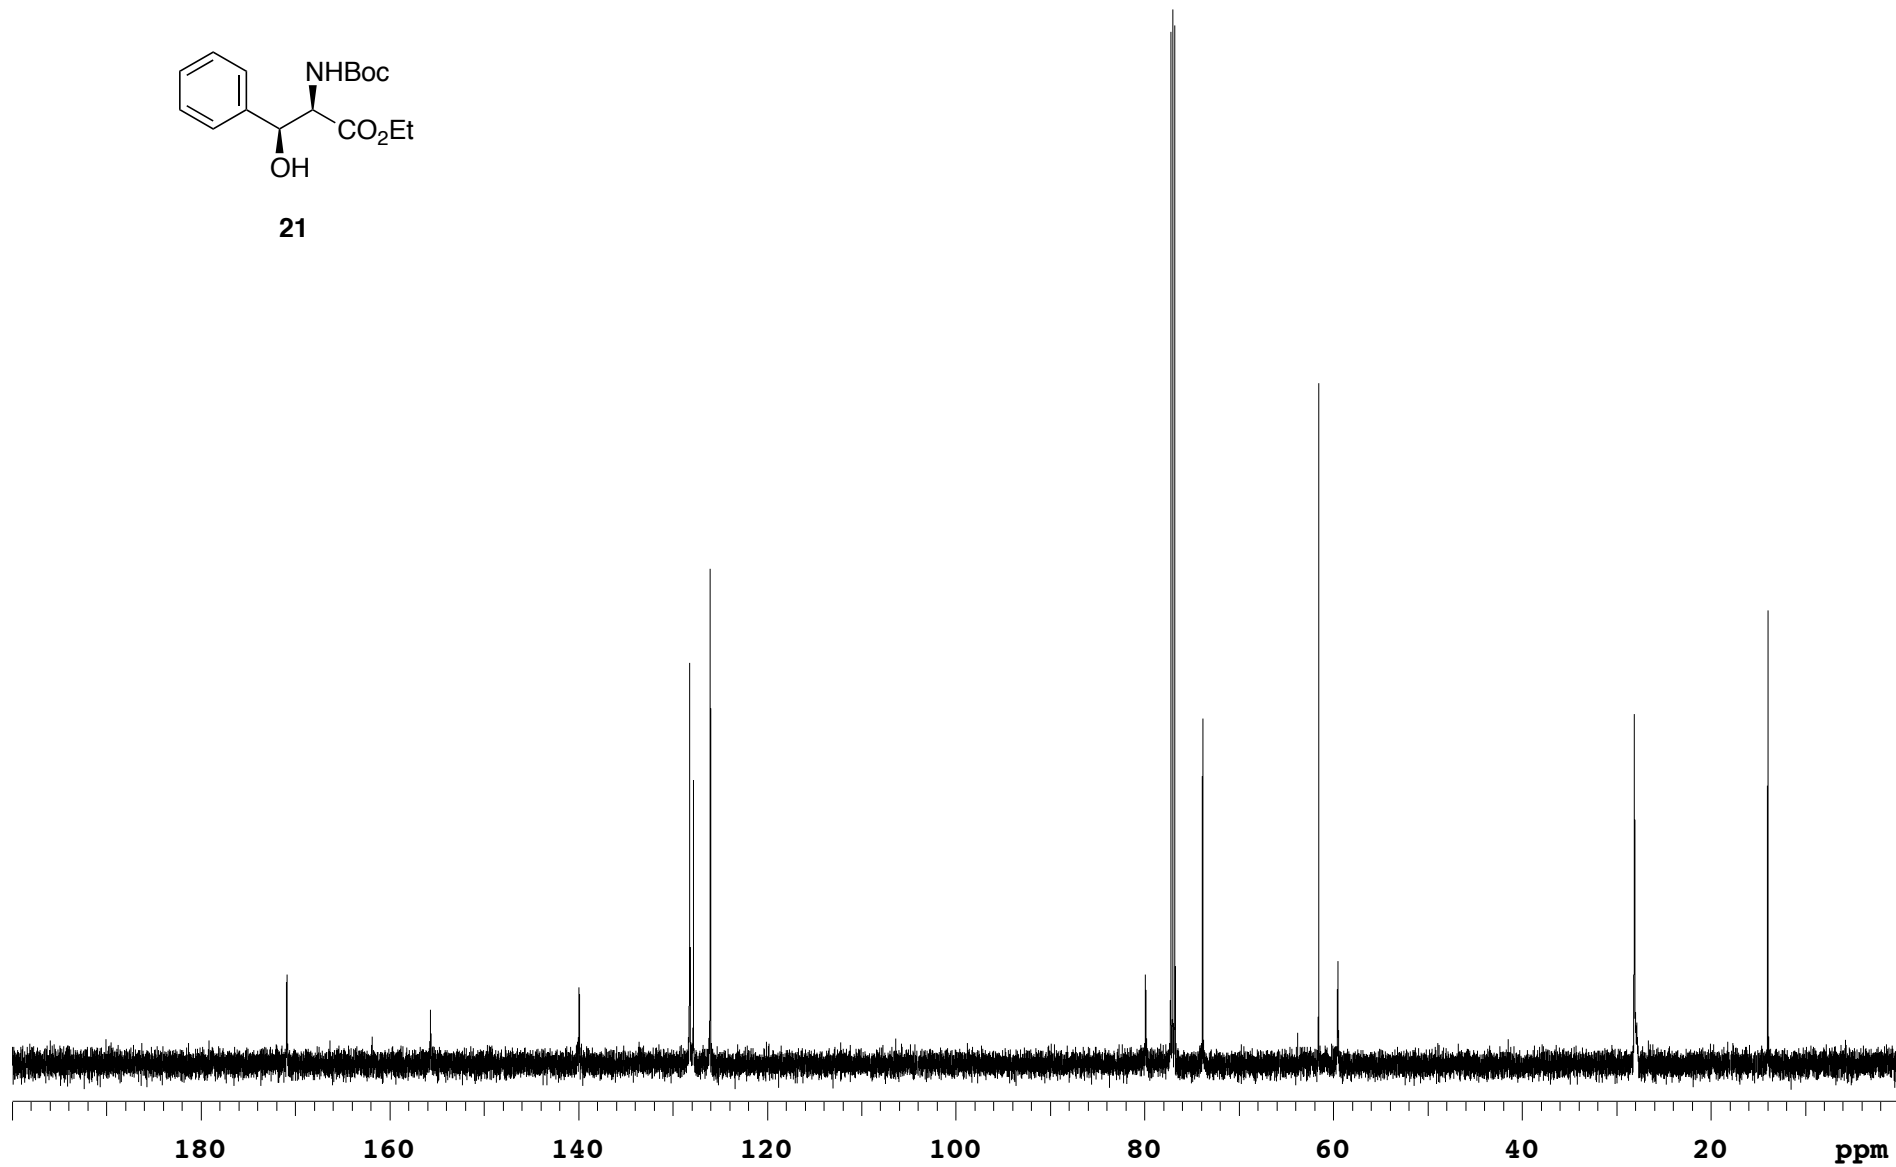

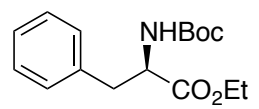

22

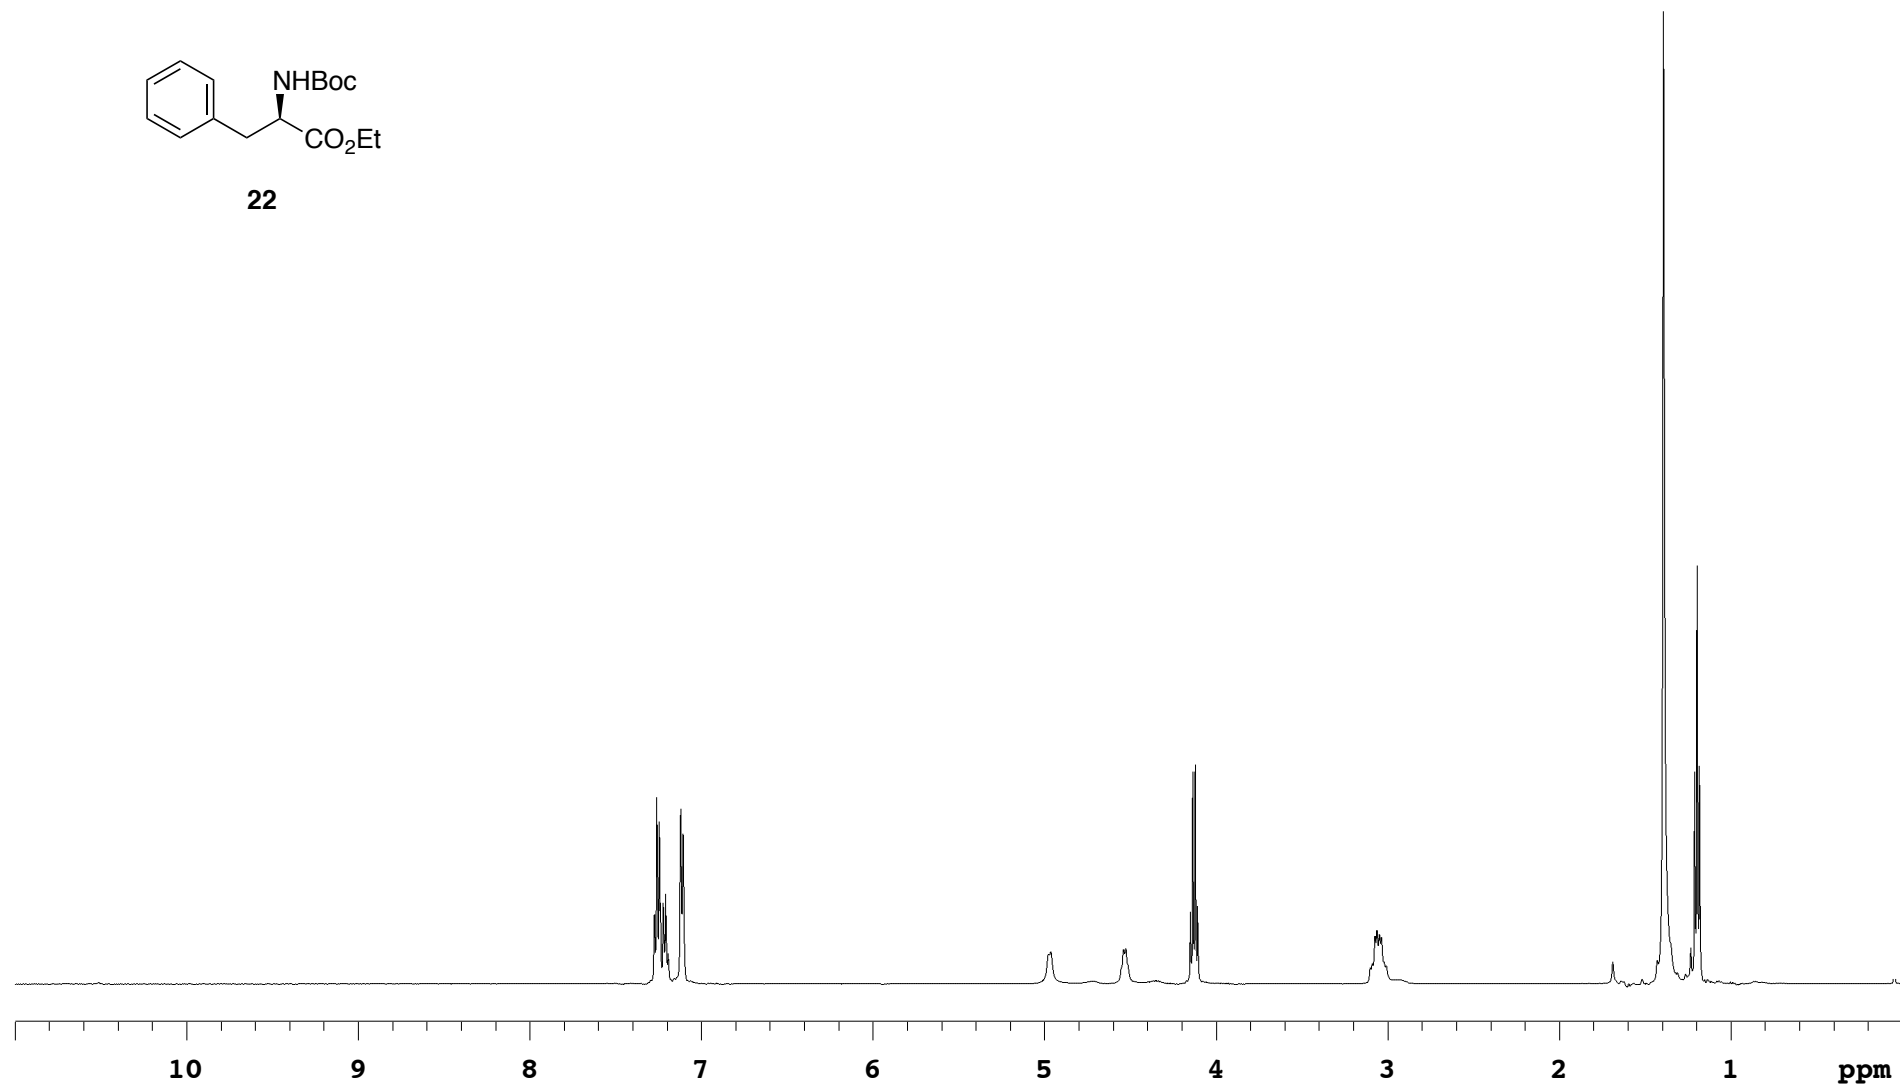

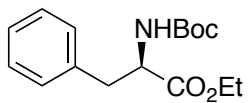

22

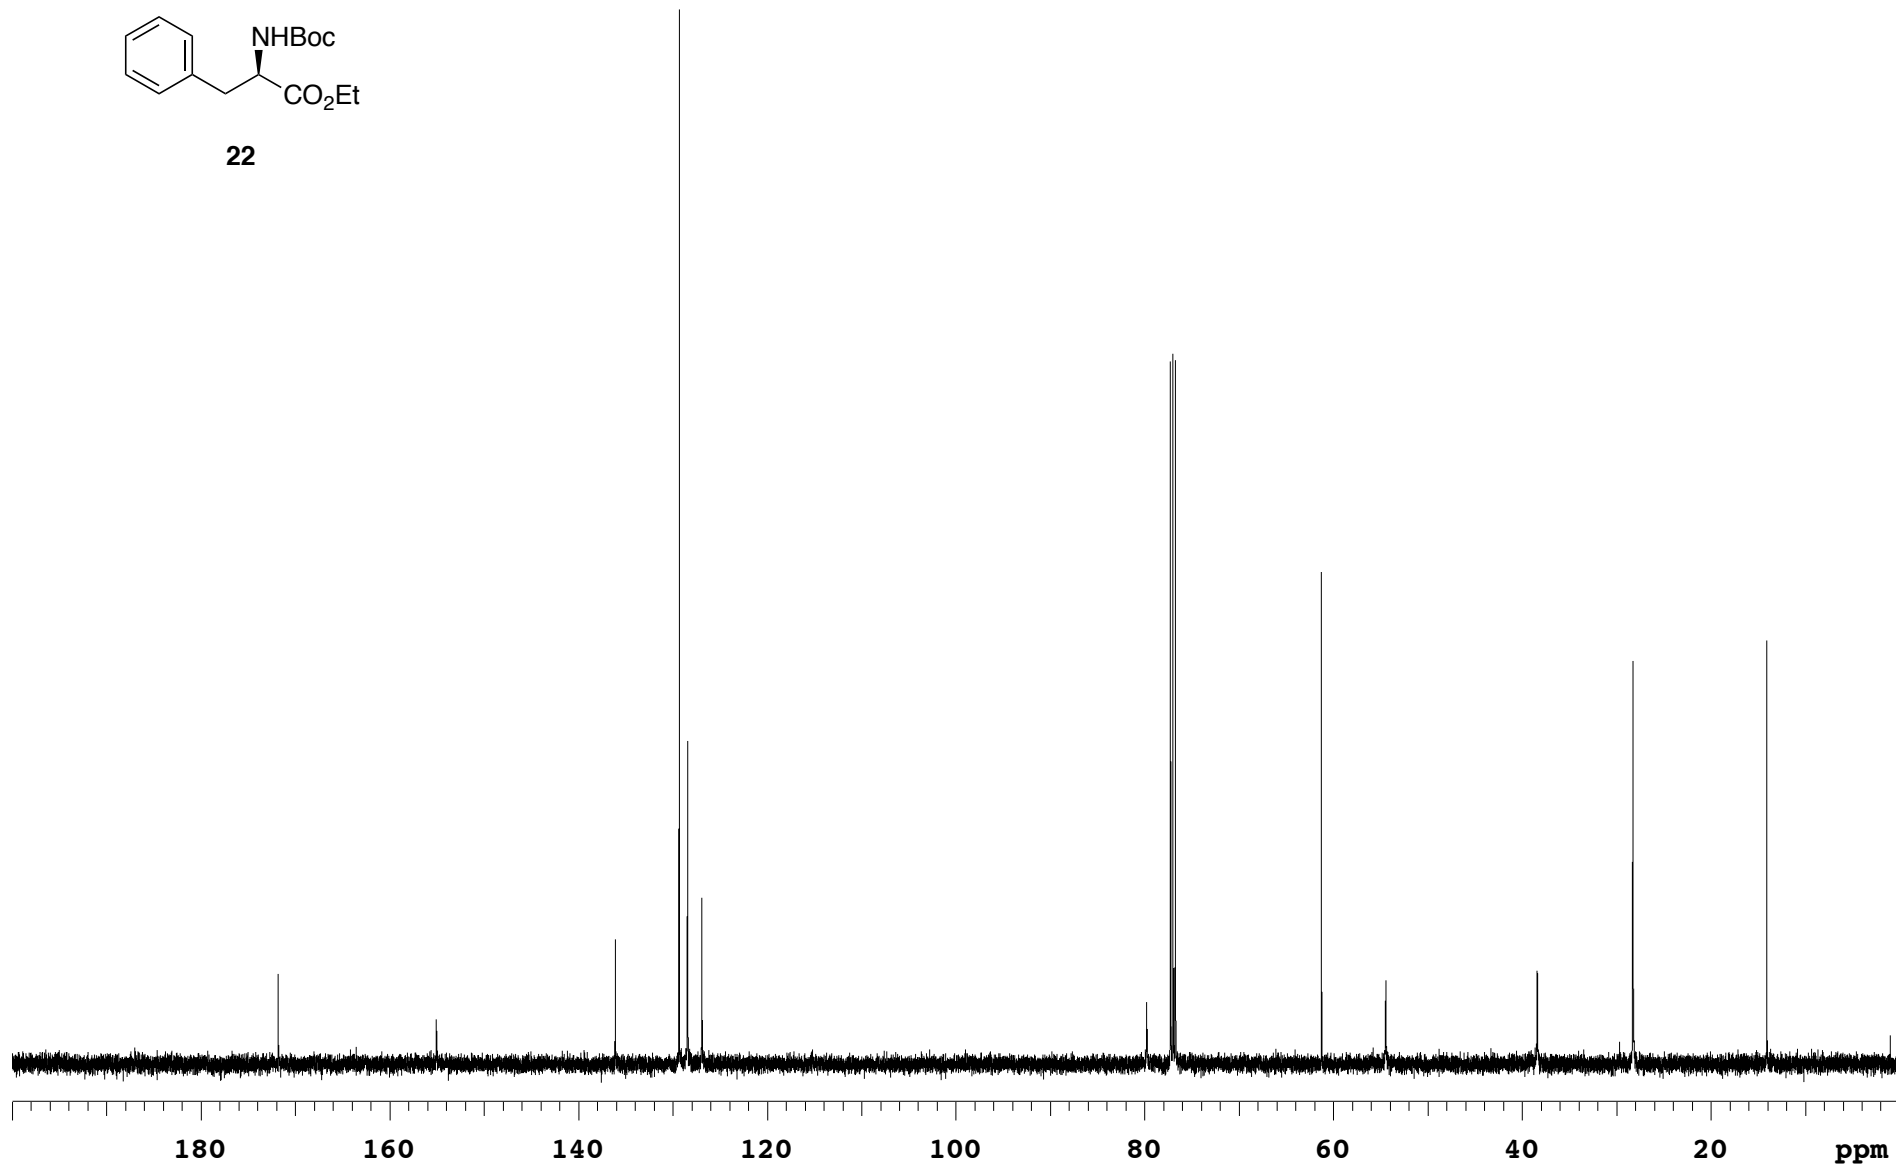

Supplement: NIHMS331047-supplement-2_si_002.pdf [file NIHMS331047-supplement-2_si_002.pdf]
